# Supplementary material
Source: publisher figshare collection journal article supplement (https://frontiersin.figshare.com/ndownloader/files/12973103)

*Supplementary Material*

**Exploitation of the Ugi 5-centre-4-component reaction (U-5C-4CR) for the generation of diverse libraries of polycyclic (spiro)compounds**

**Lisa Moni<sup>1</sup>, Fabio De Moliner<sup>1</sup>, Silvia Garbarino<sup>1</sup>, Jörn Saupe<sup>2</sup>, Christian Mang<sup>2\*</sup> and Andrea Basso<sup>1\*</sup>**

**\* Correspondence:**

Christian Mang: [c.mang@ac-discovery.com](mailto:c.mang@ac-discovery.com)

Andrea Basso: [andrea.basso@unige.it](mailto:andrea.basso@unige.it)

**<sup>1</sup>H-NMR and <sup>13</sup>C-MR spectra**

## Compound 2

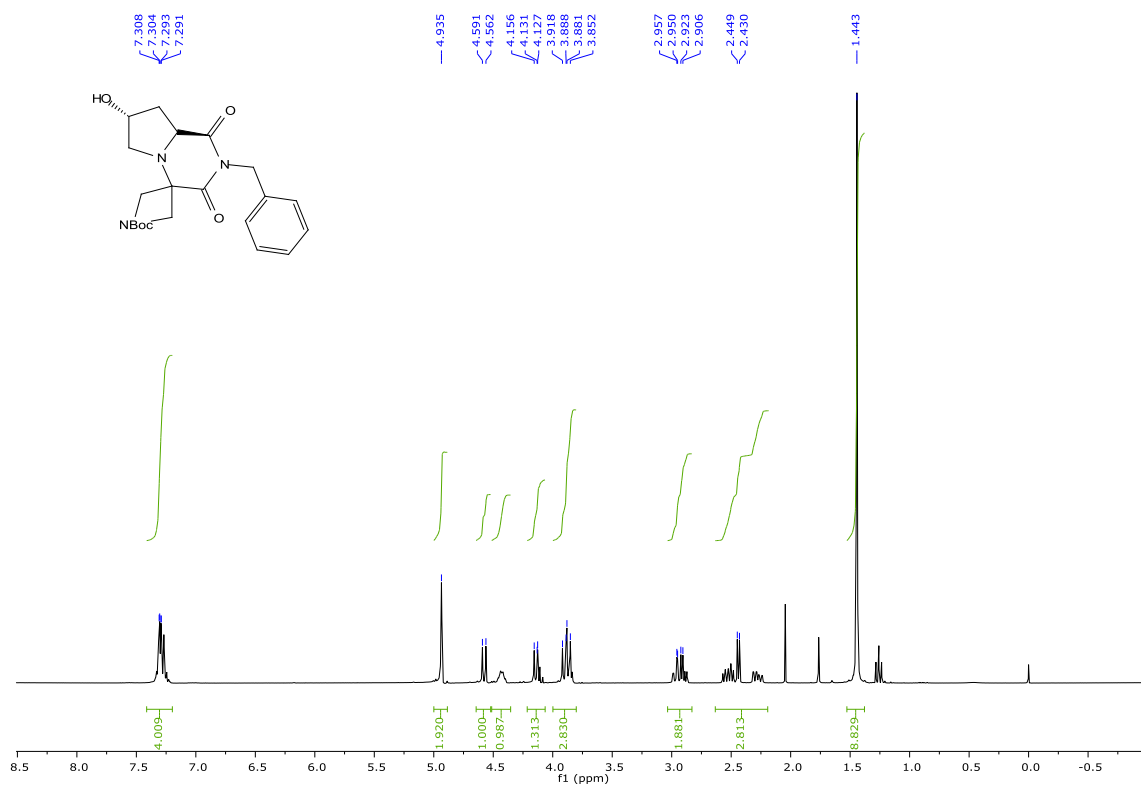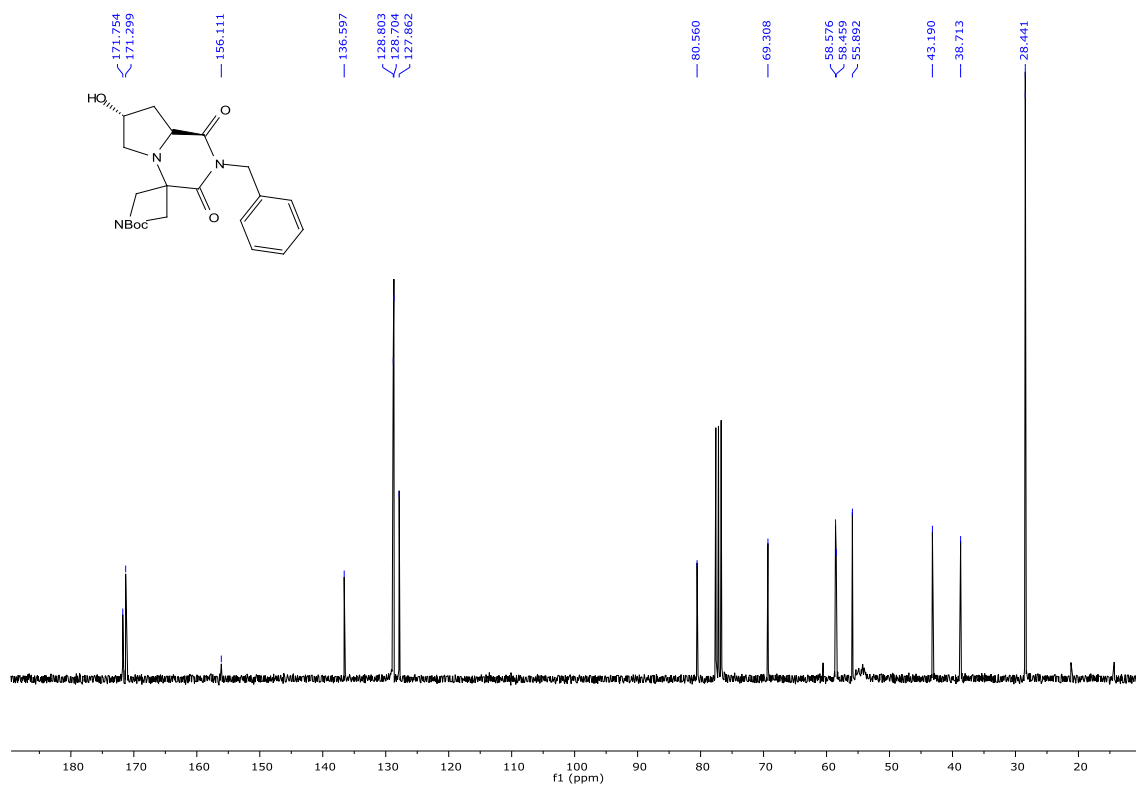

# Compound 3

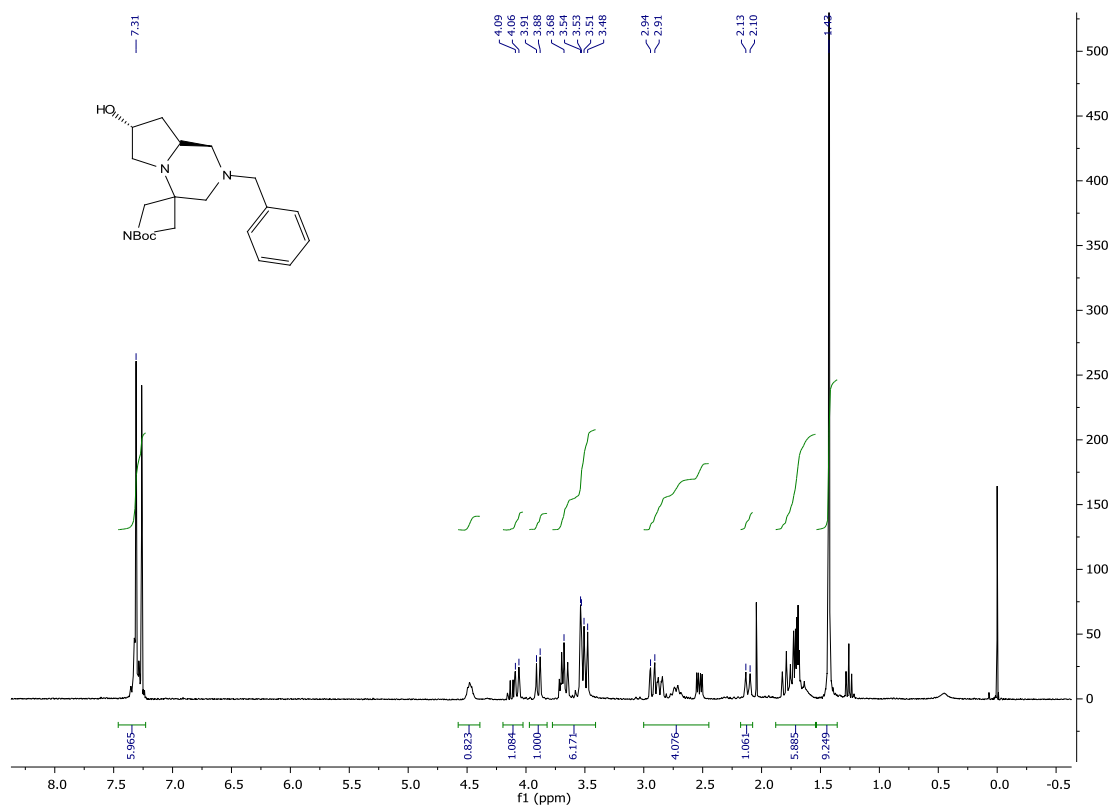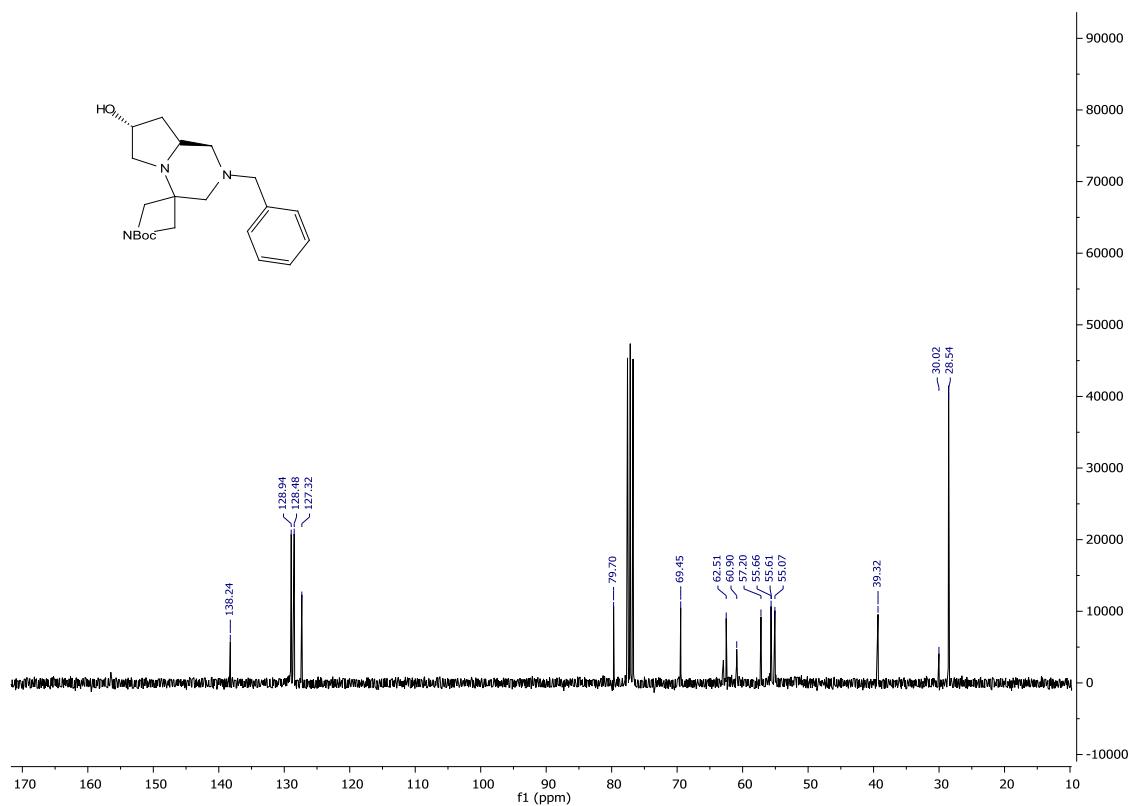

## Compound 4

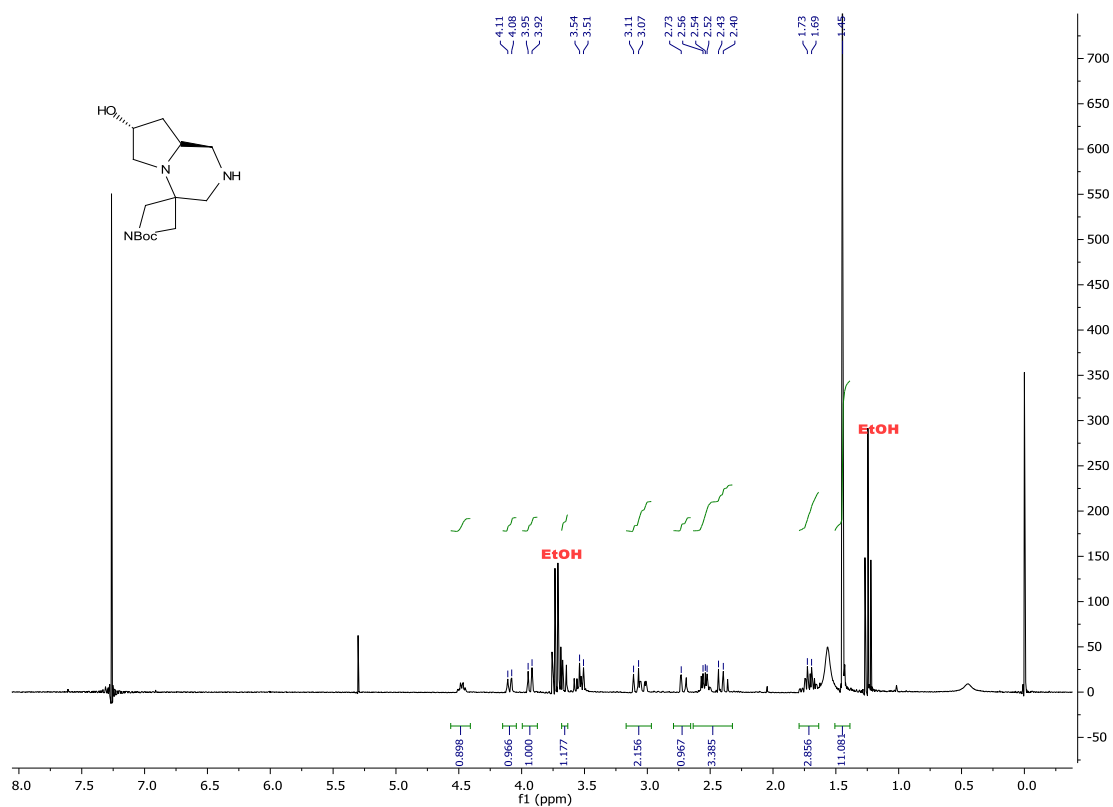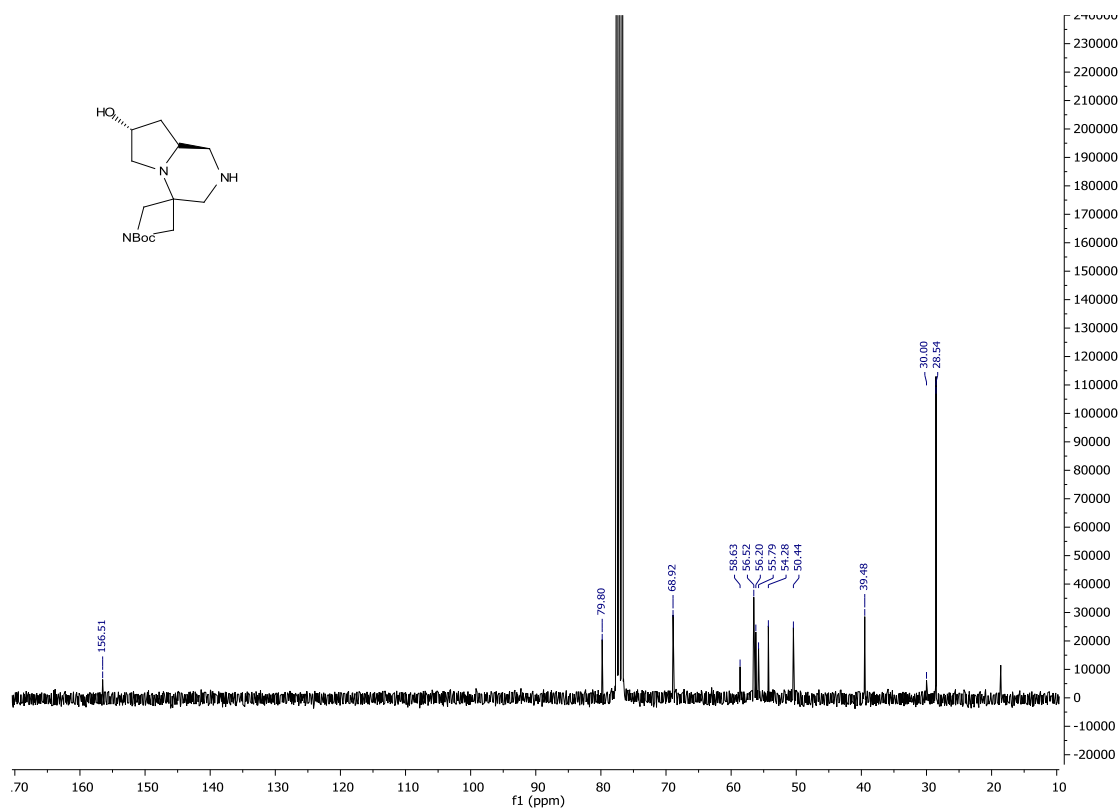

## Intermediate in the synthesis of compound 9

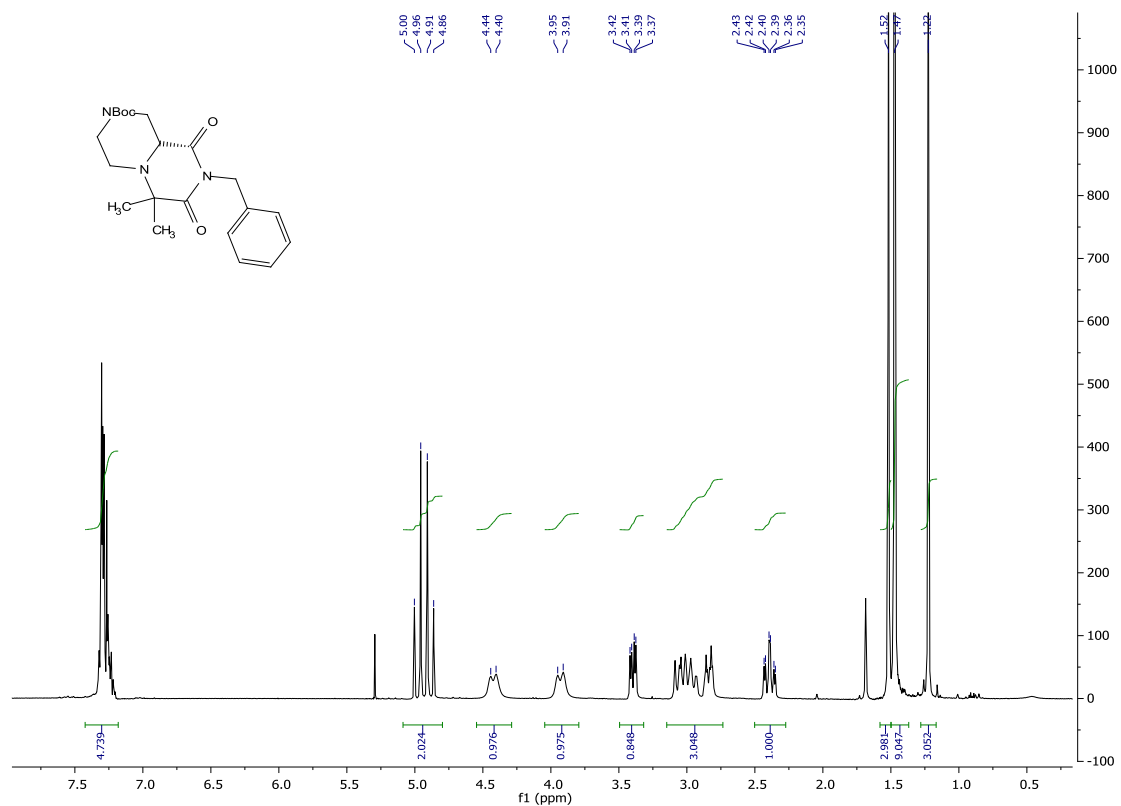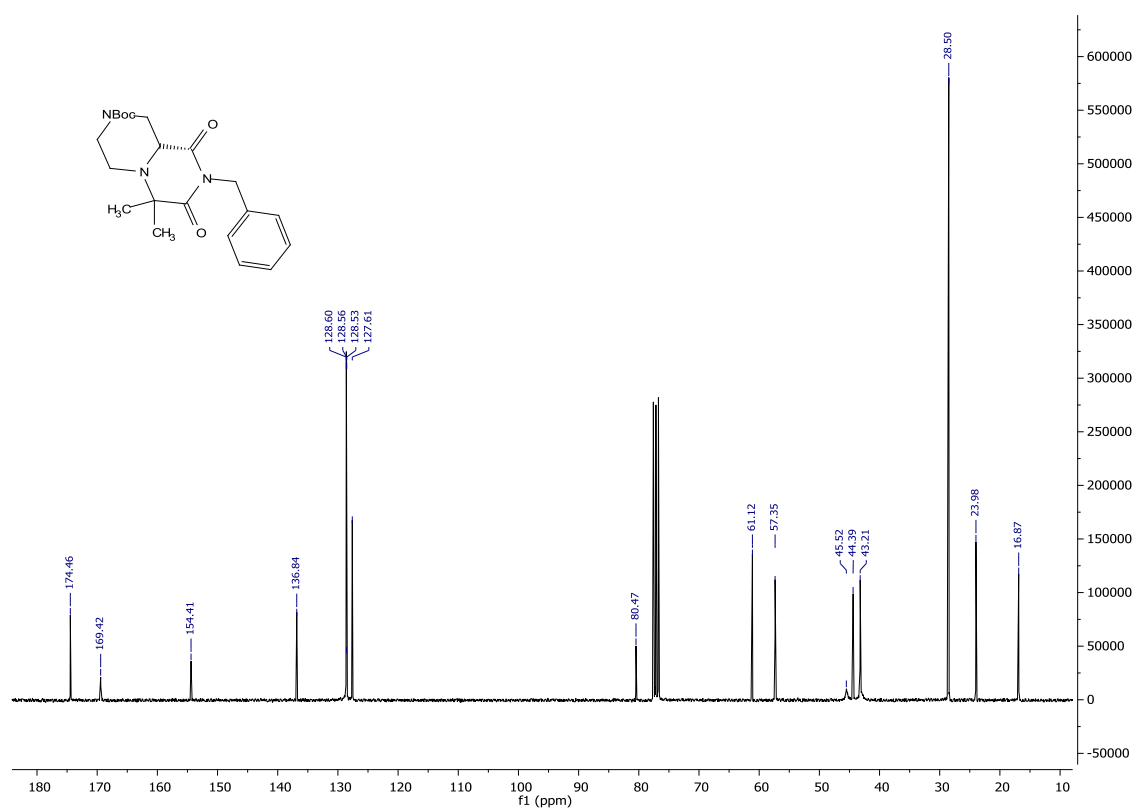

## Intermediate in the synthesis of compound 9

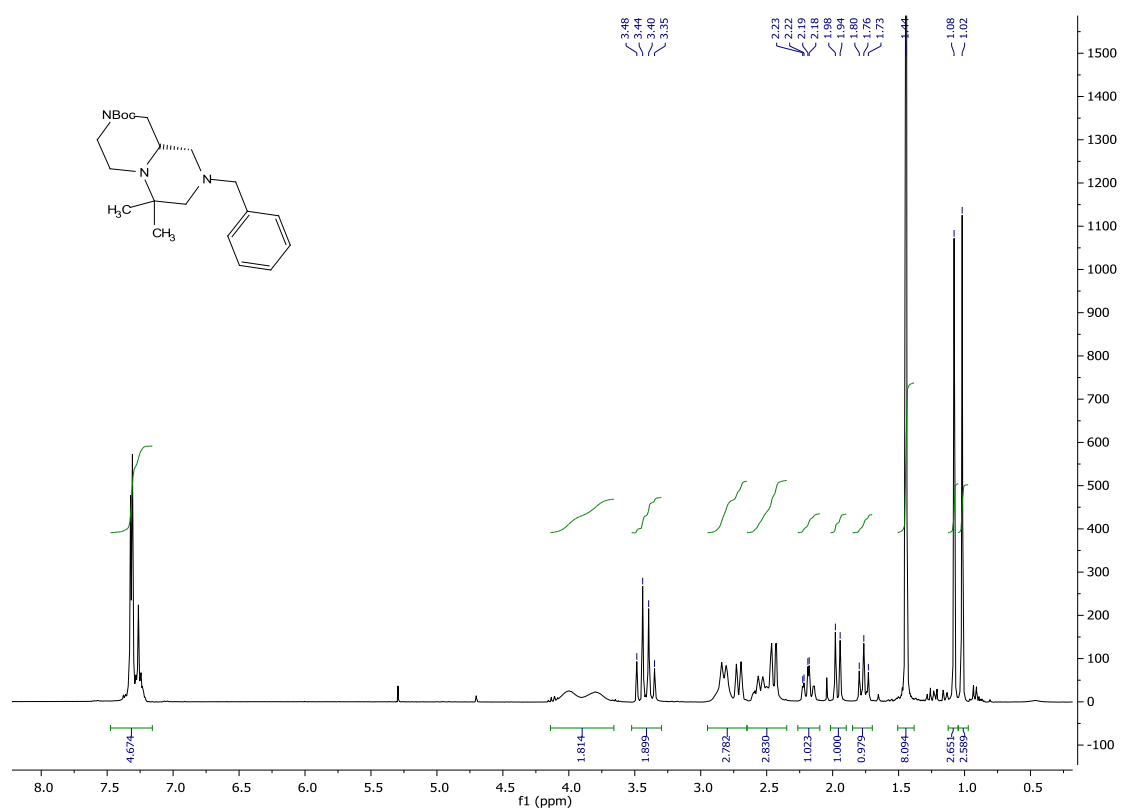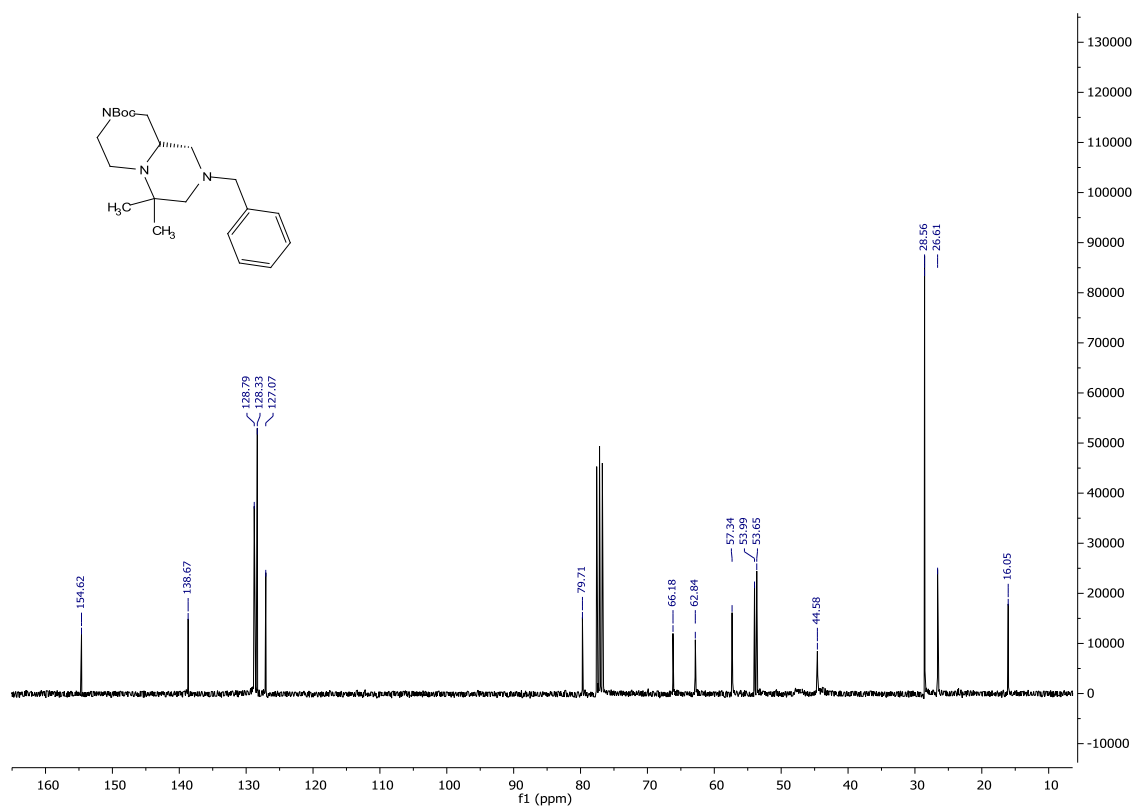

# Compound 9

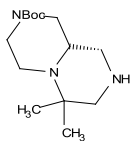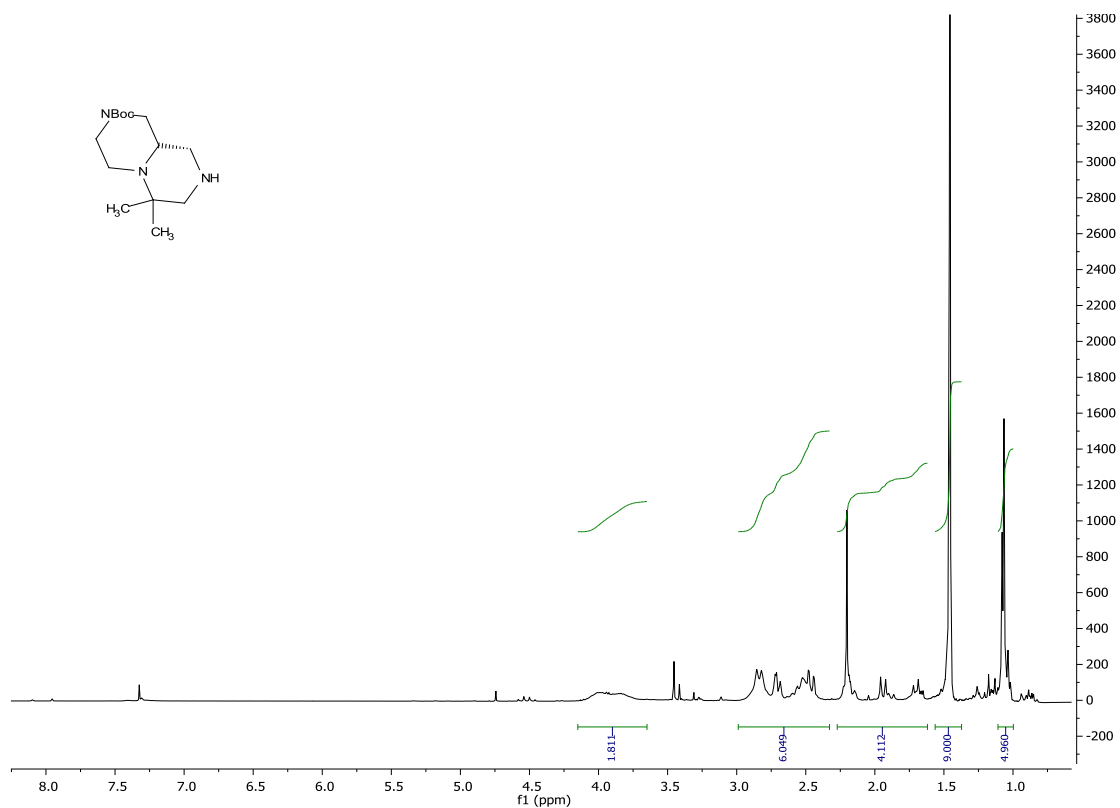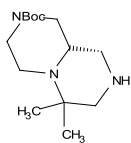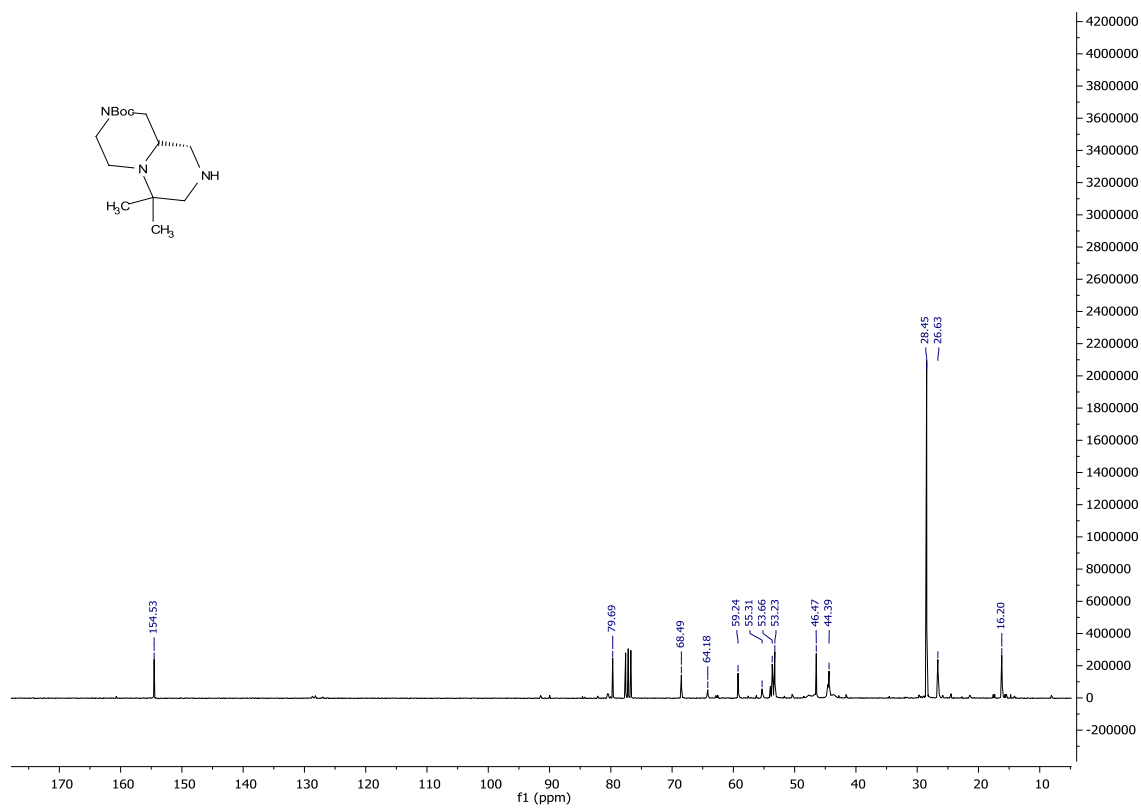

## Intermediate in the synthesis of compound 10

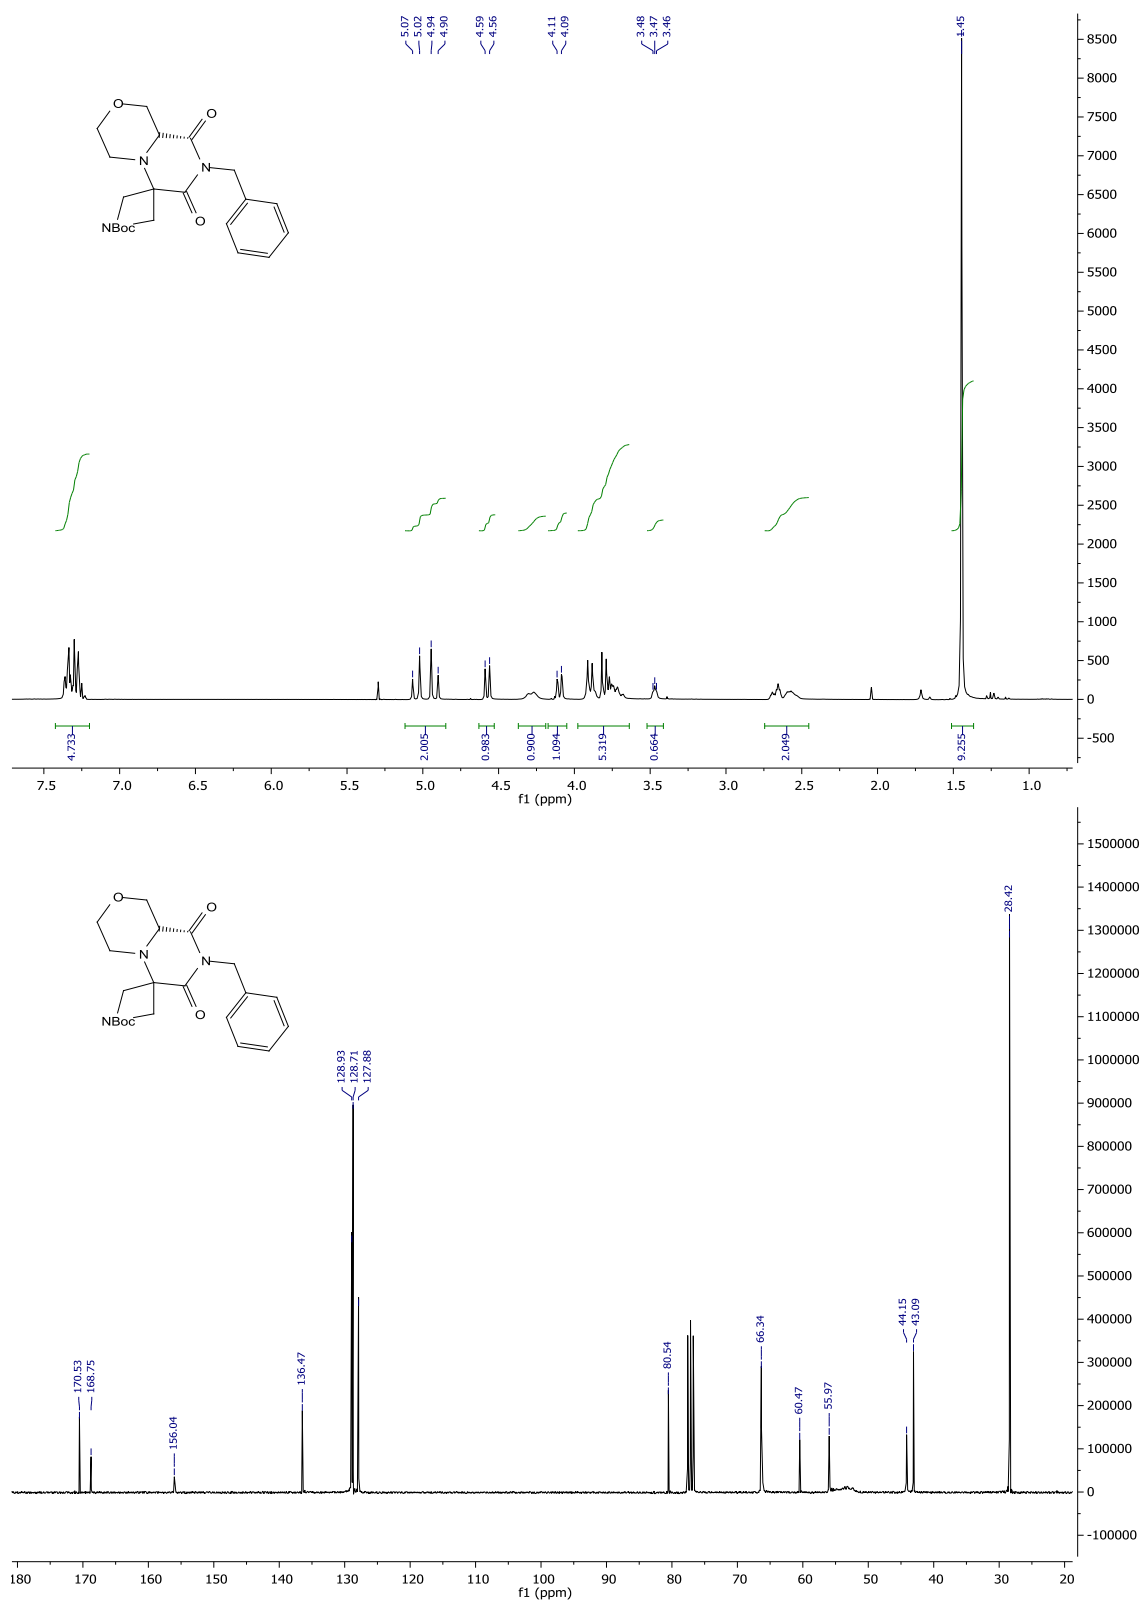



# Intermediate in the synthesis of compound 10

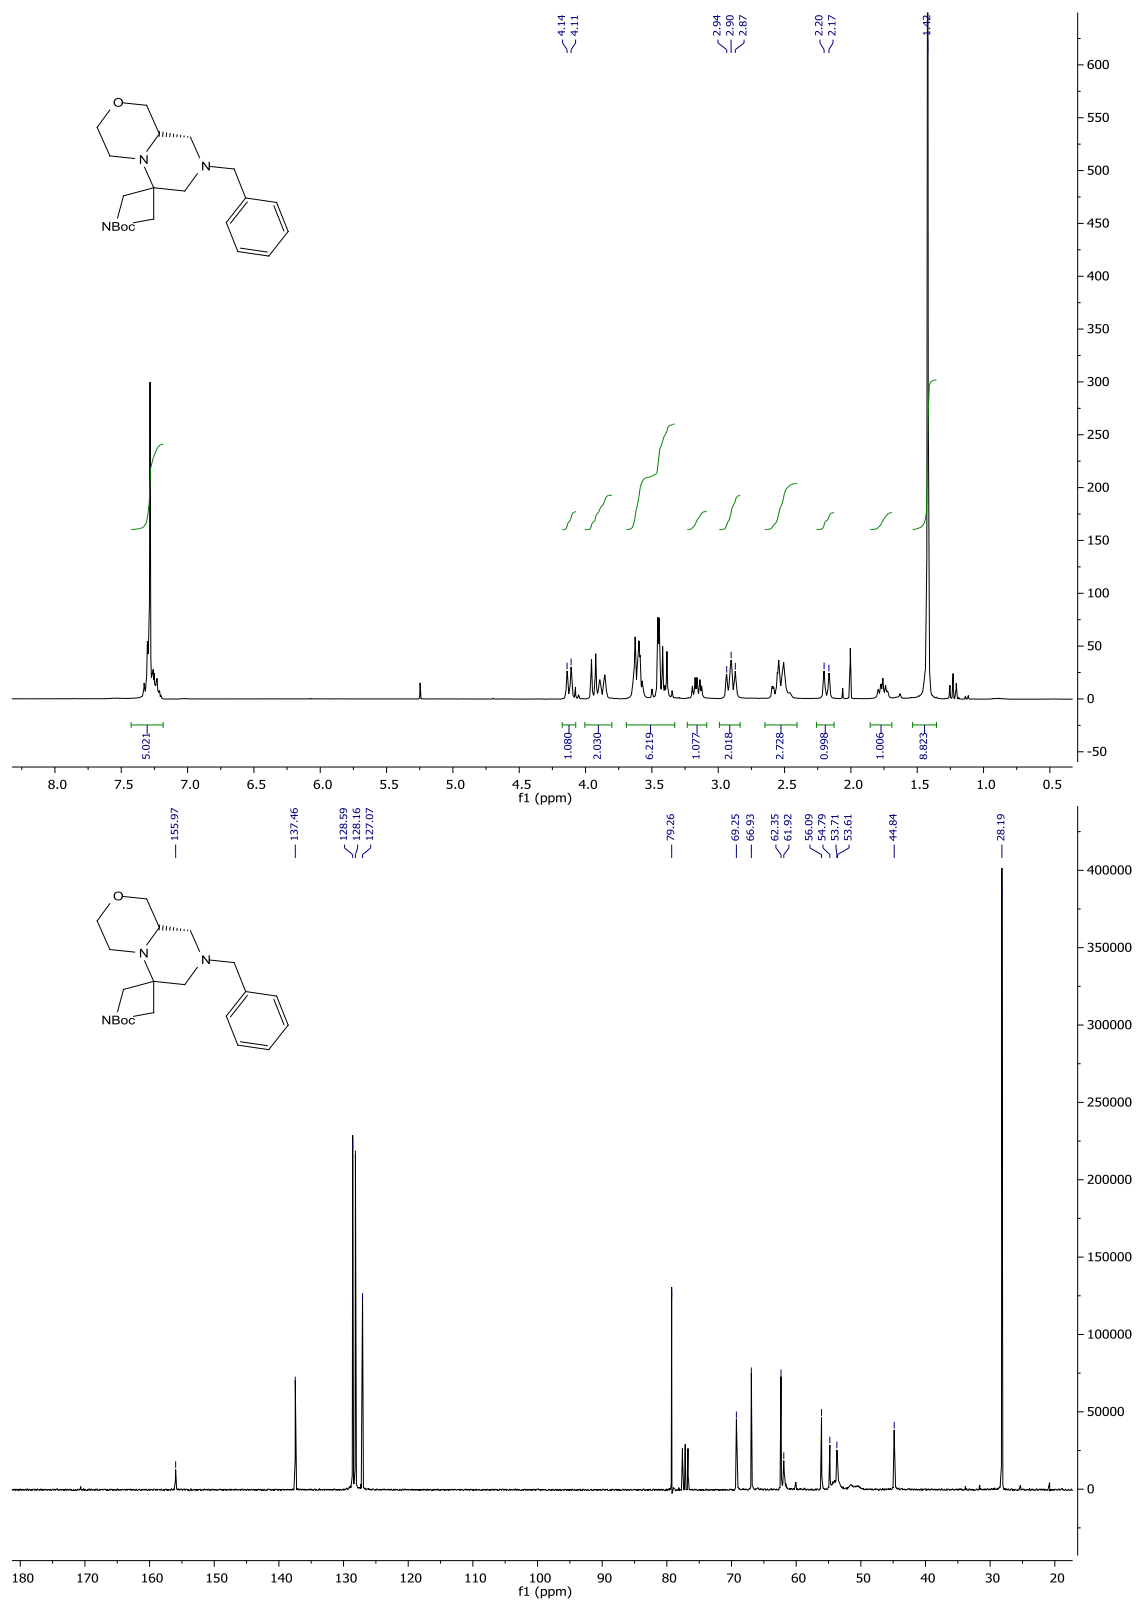

## Compound 10

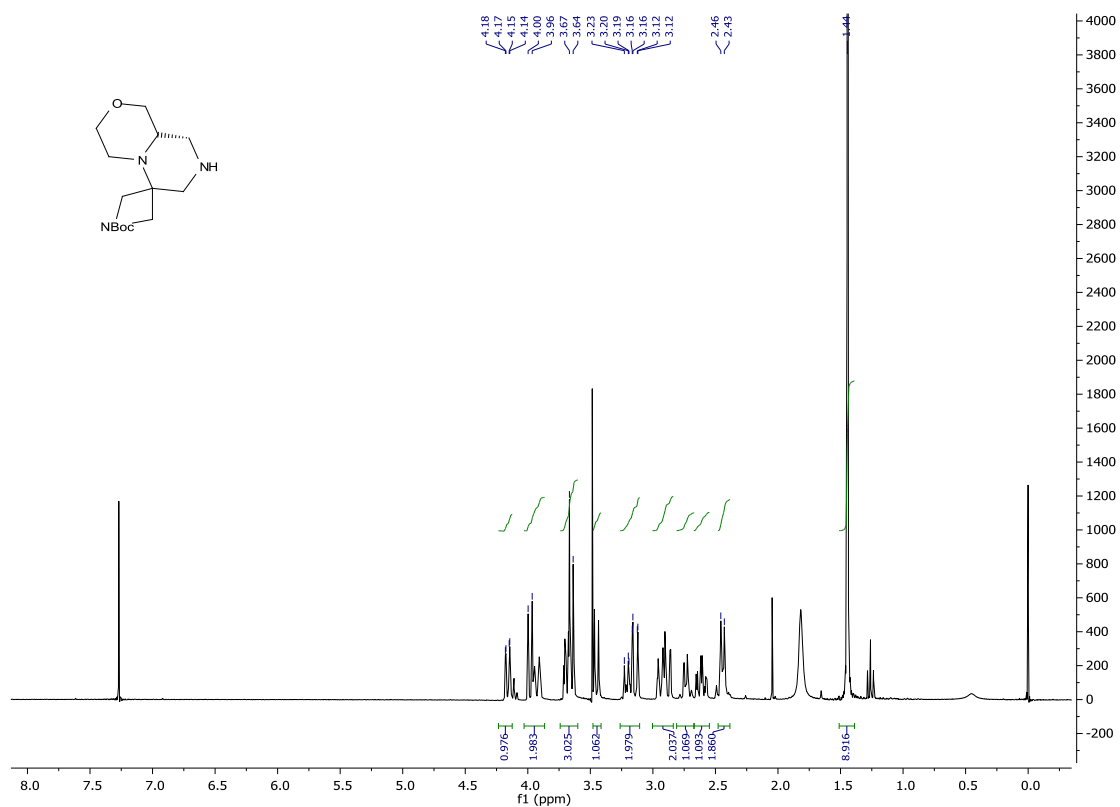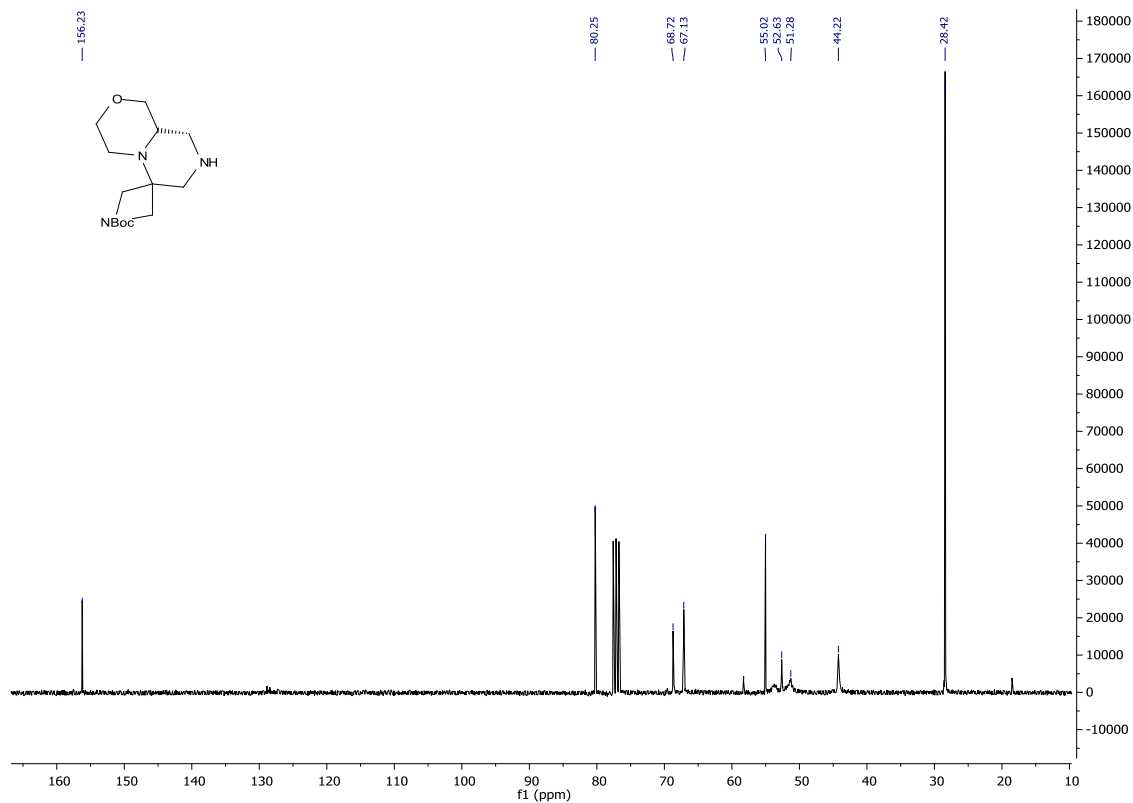

# Compound 11

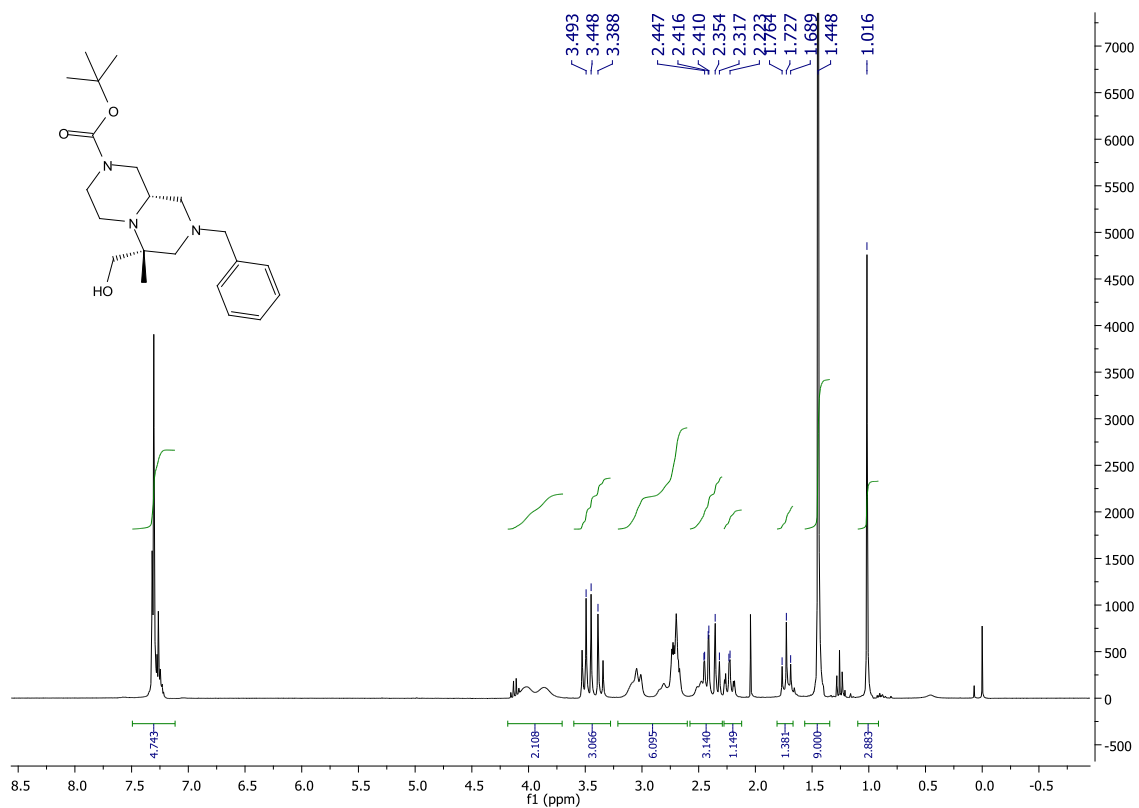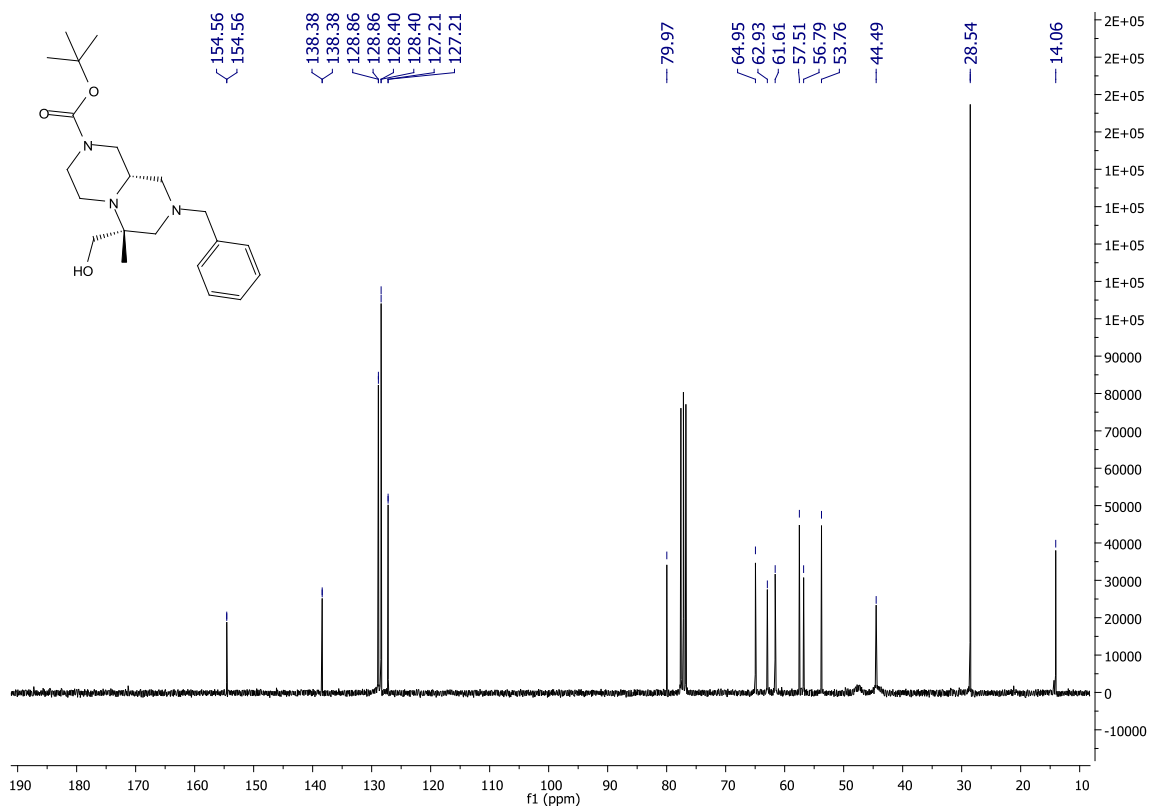

## Compound 6{3,4}

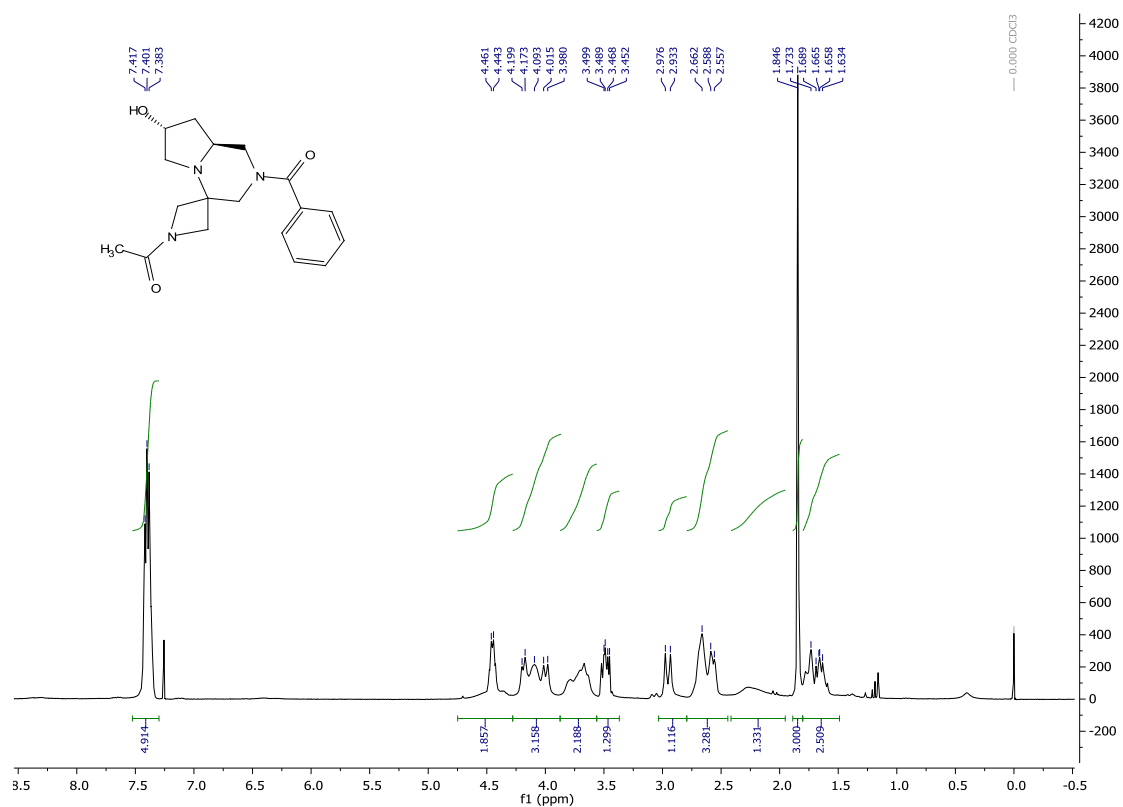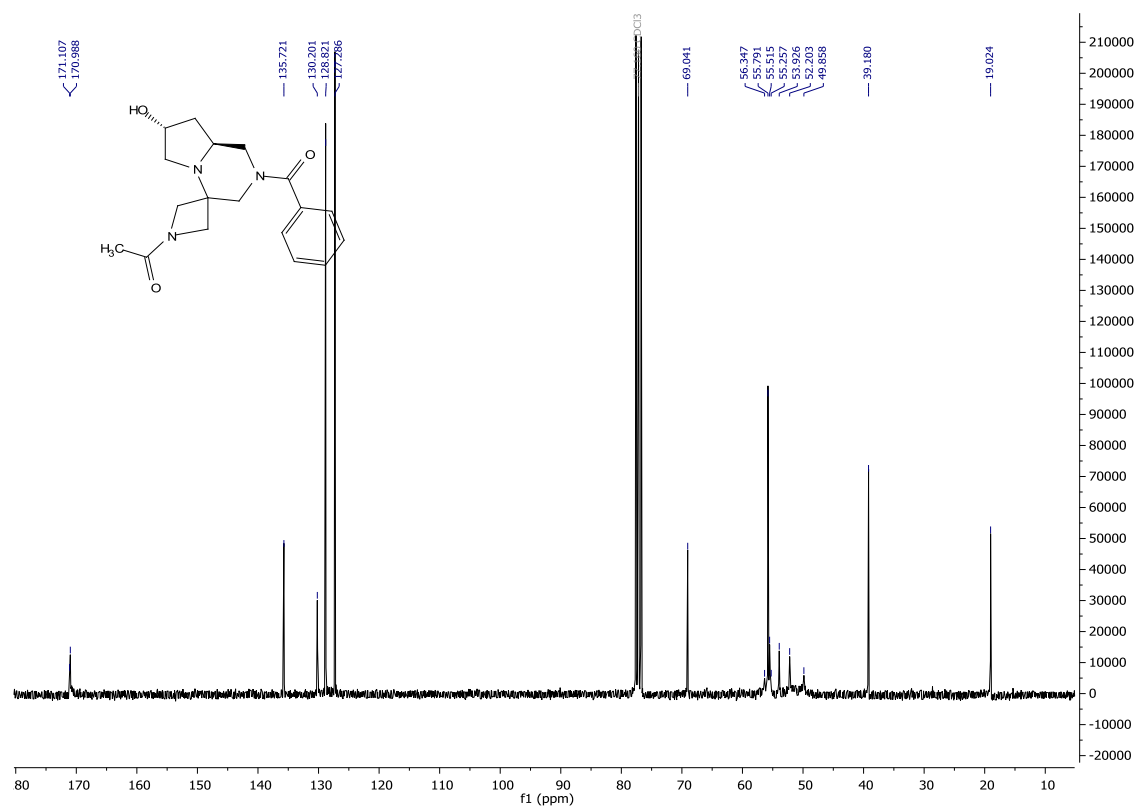

# Compound 6{4,5}

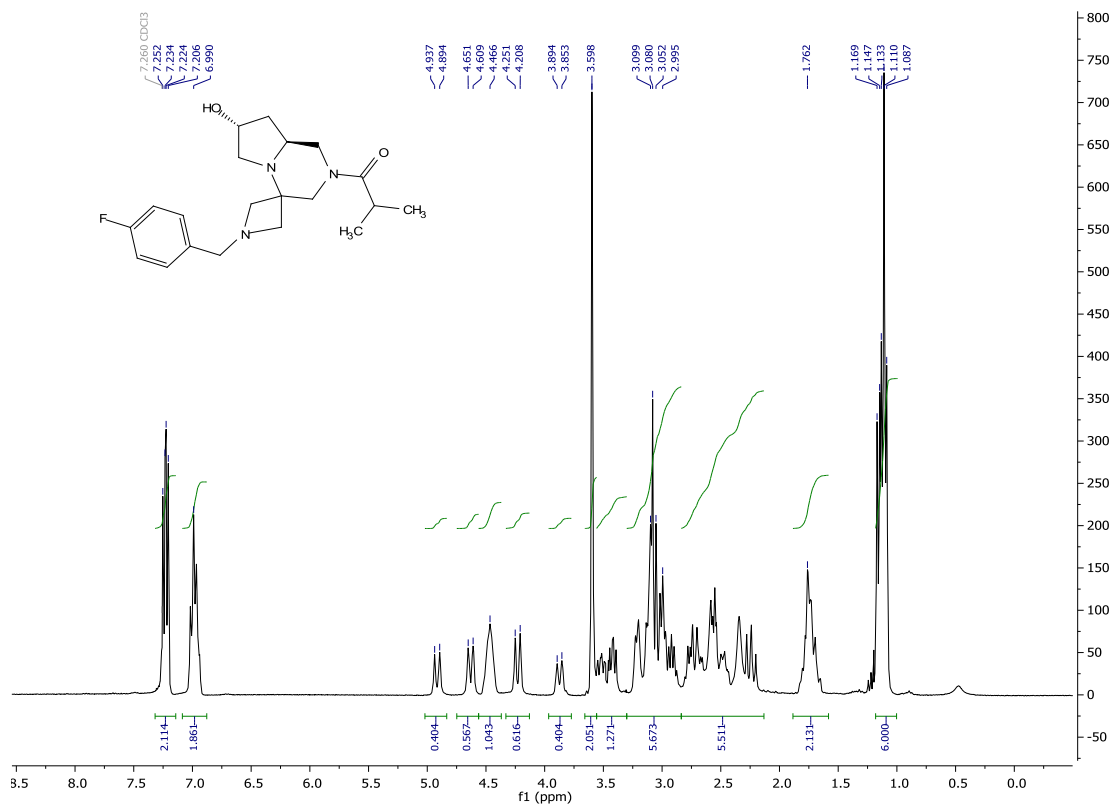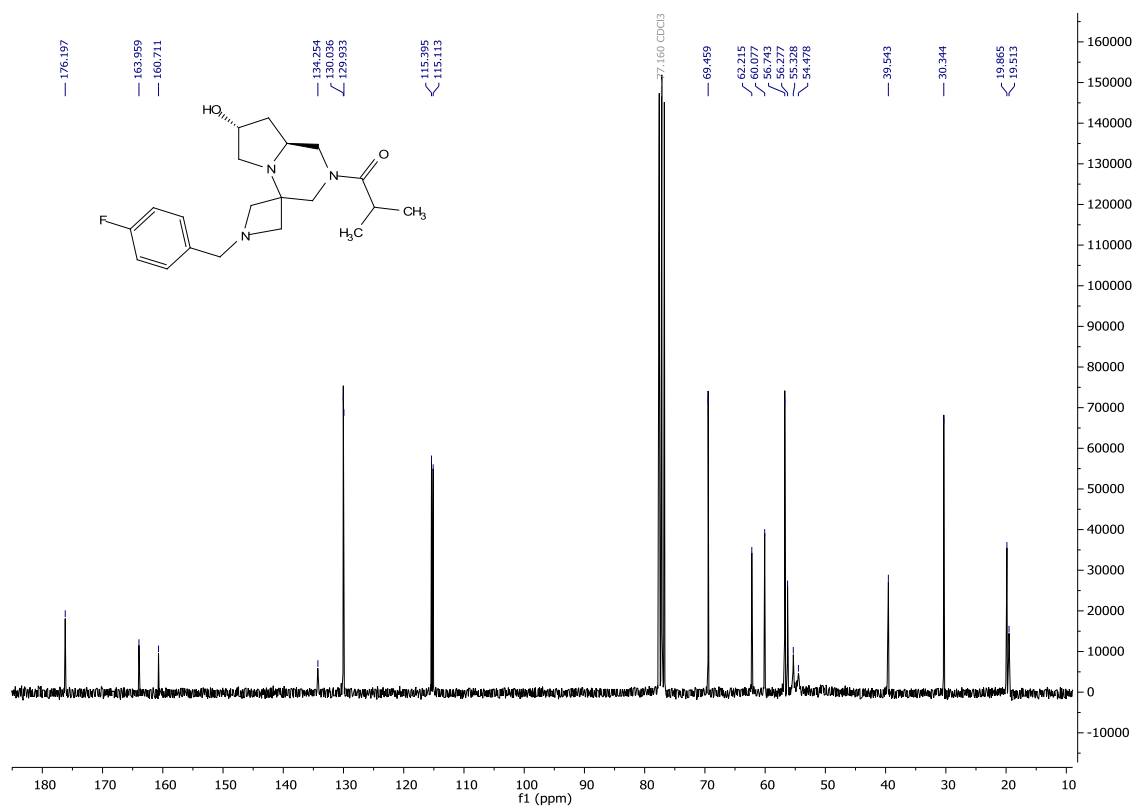

## Compound 13{8,1}

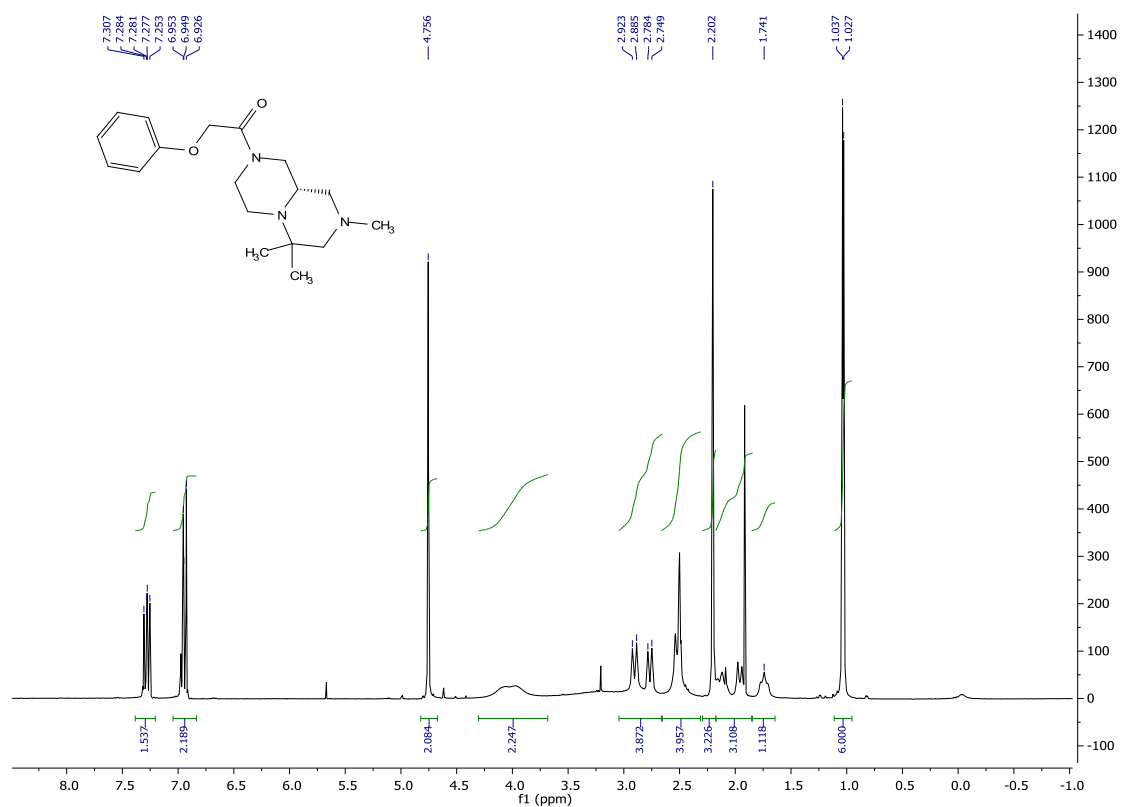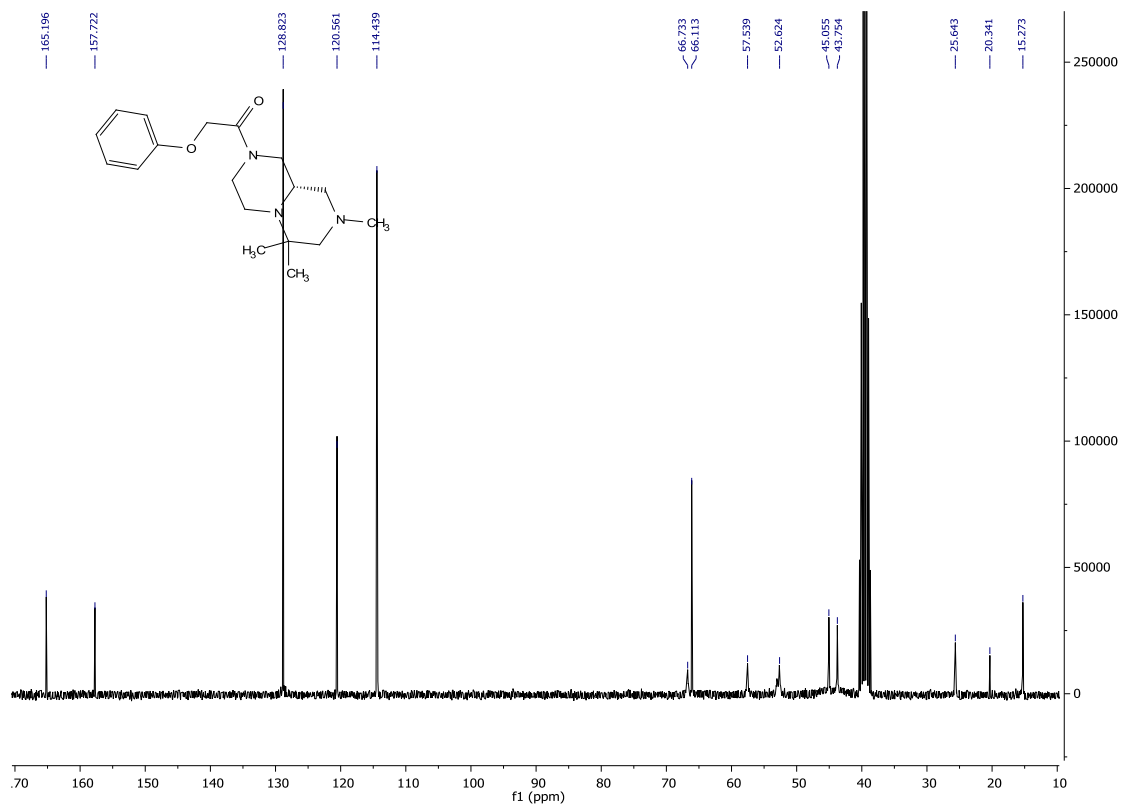

# Compound 13{6,2}

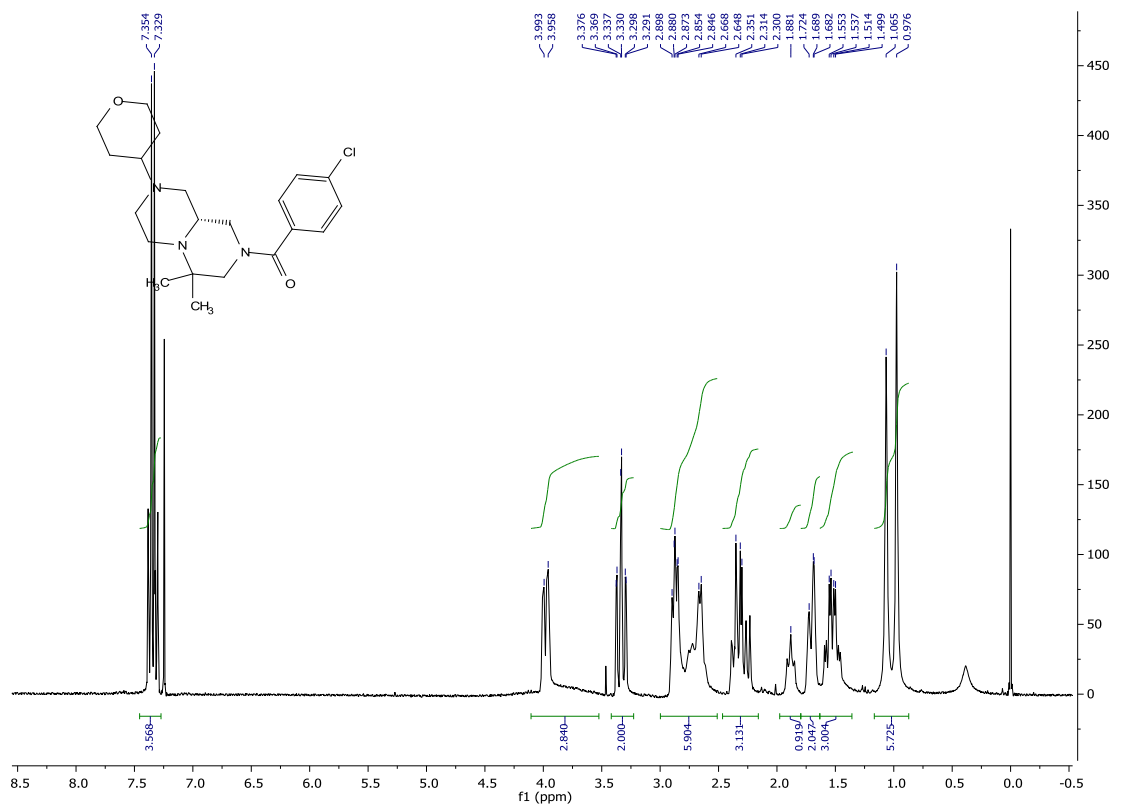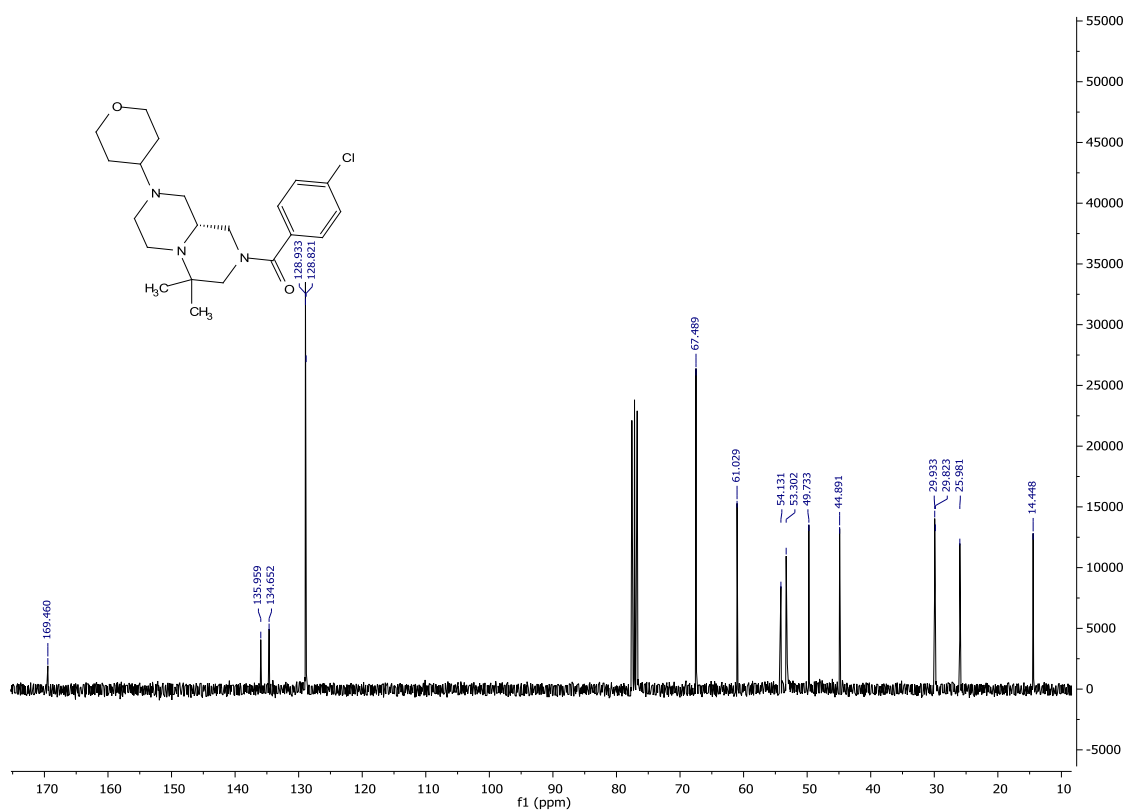

## Compound 15{8,4}

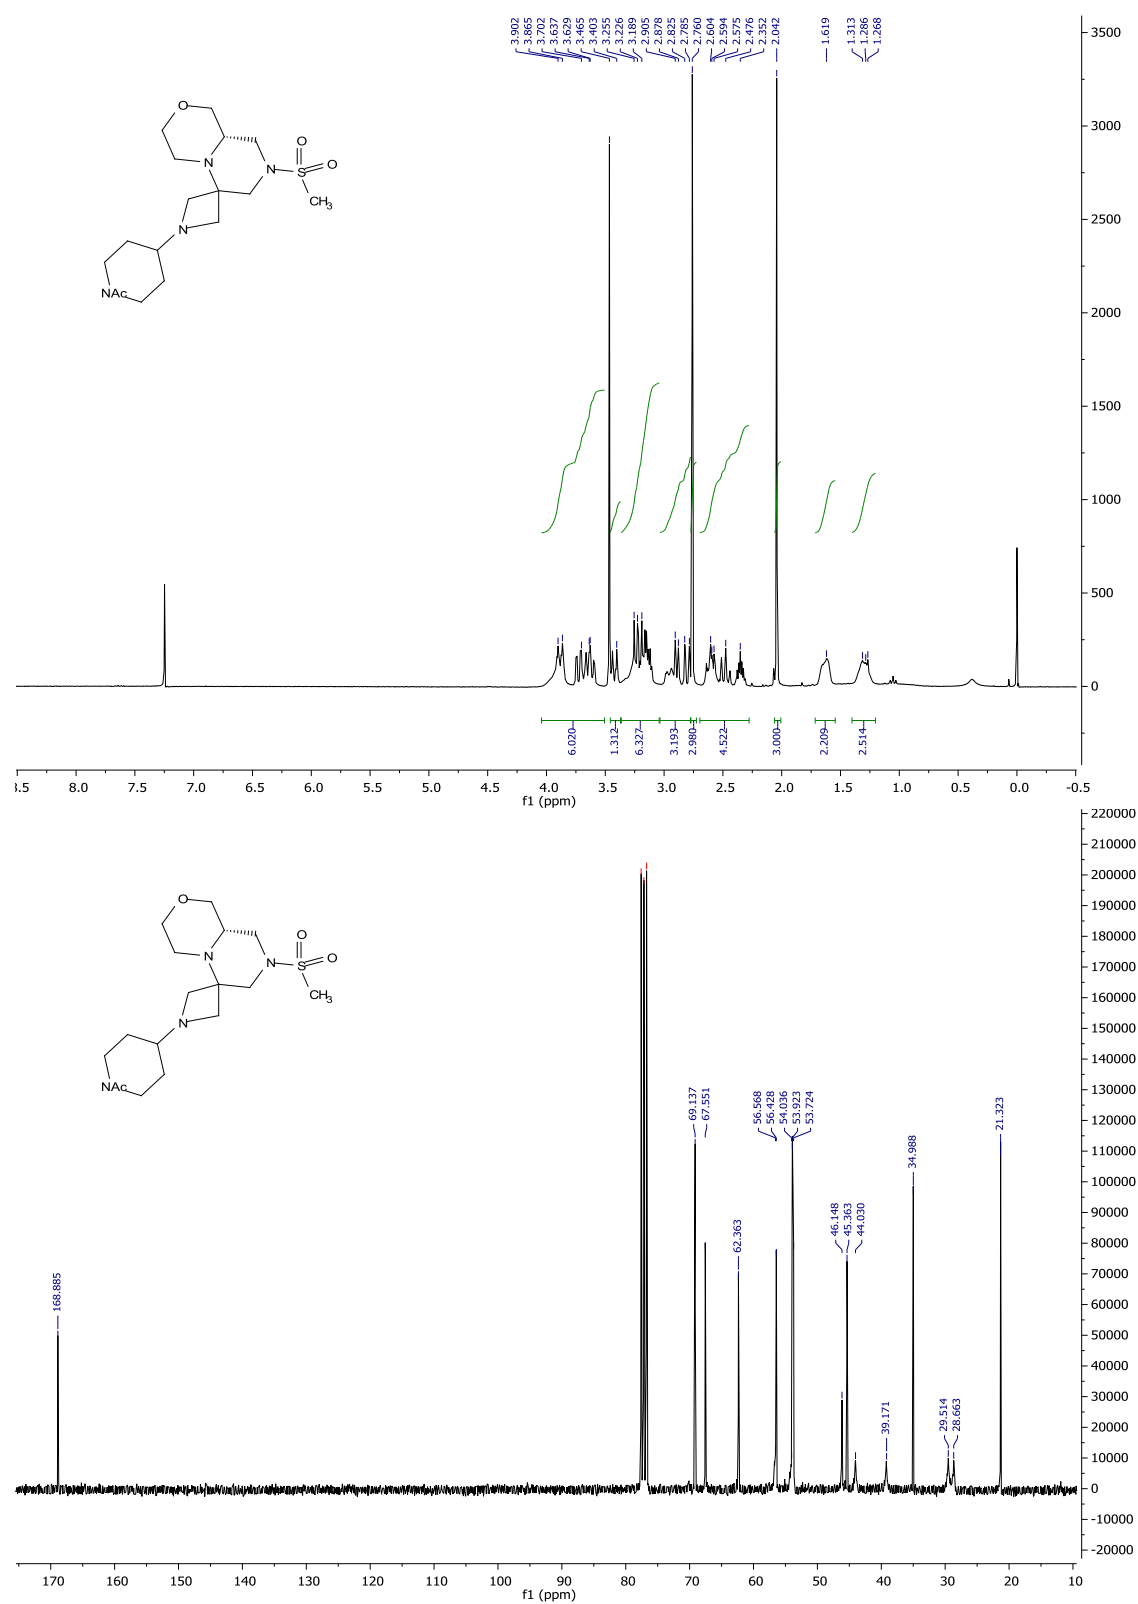



# Compound 15{6,3}

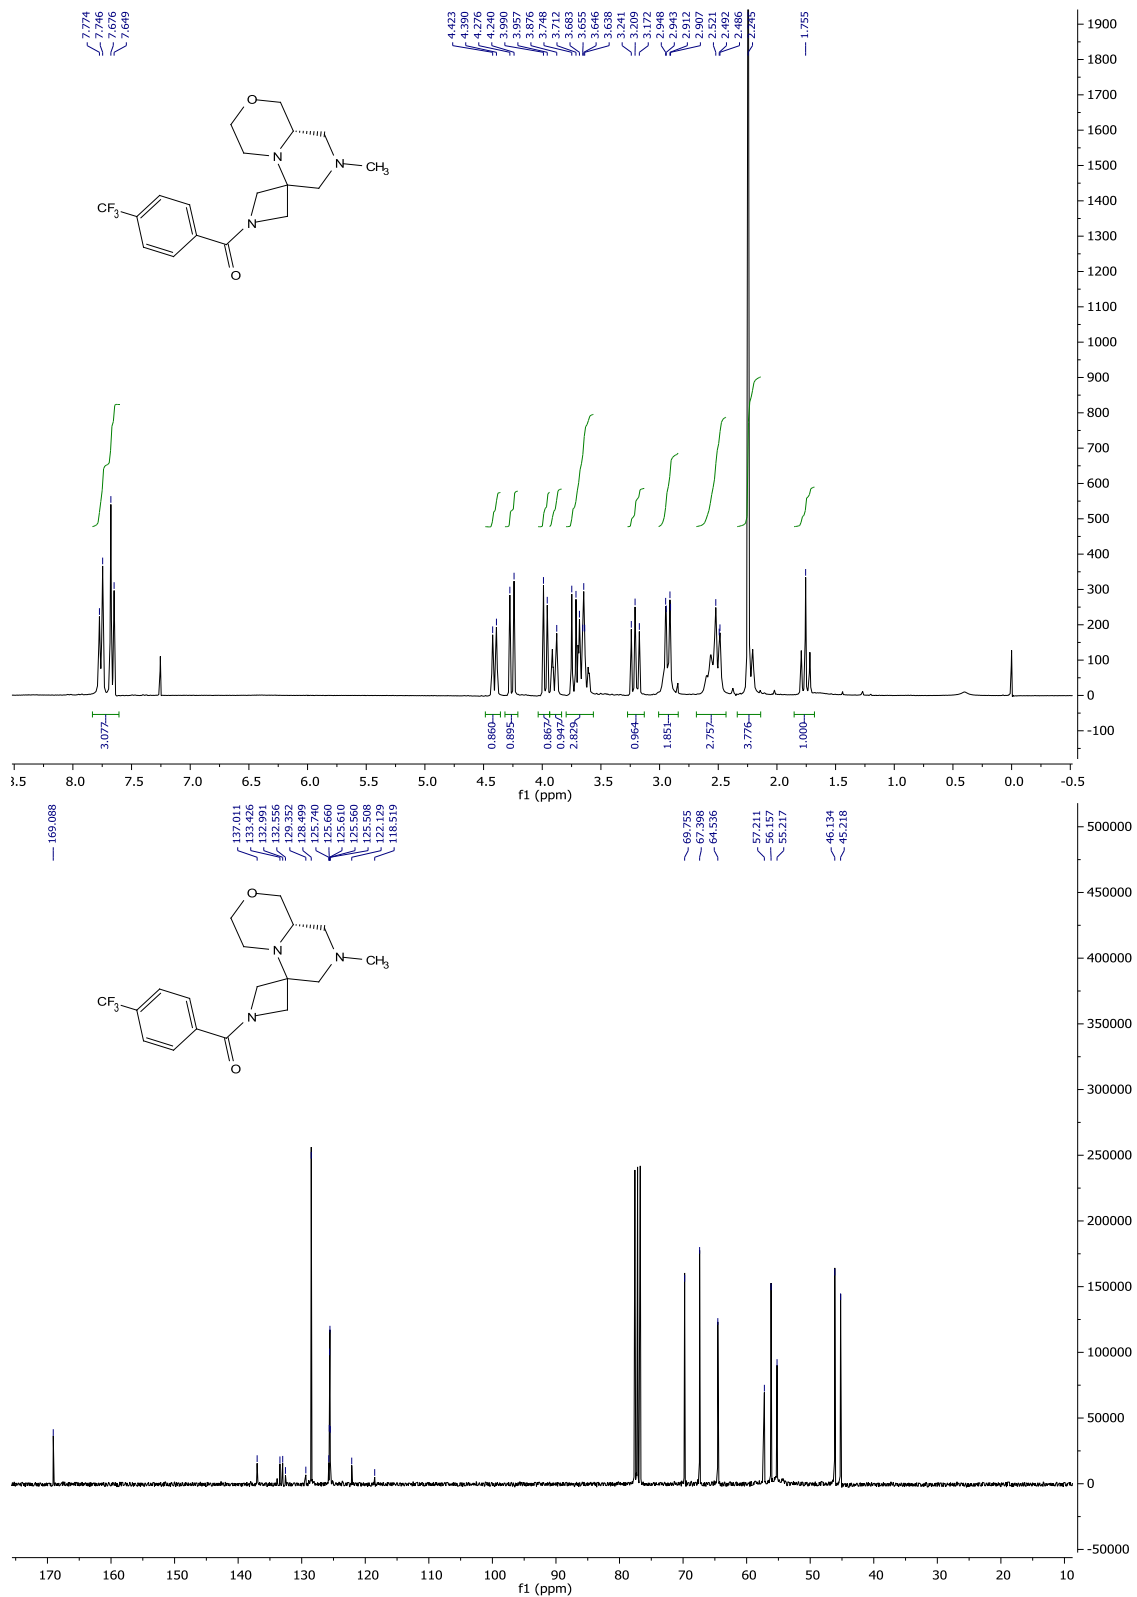

## Compound 5{3}

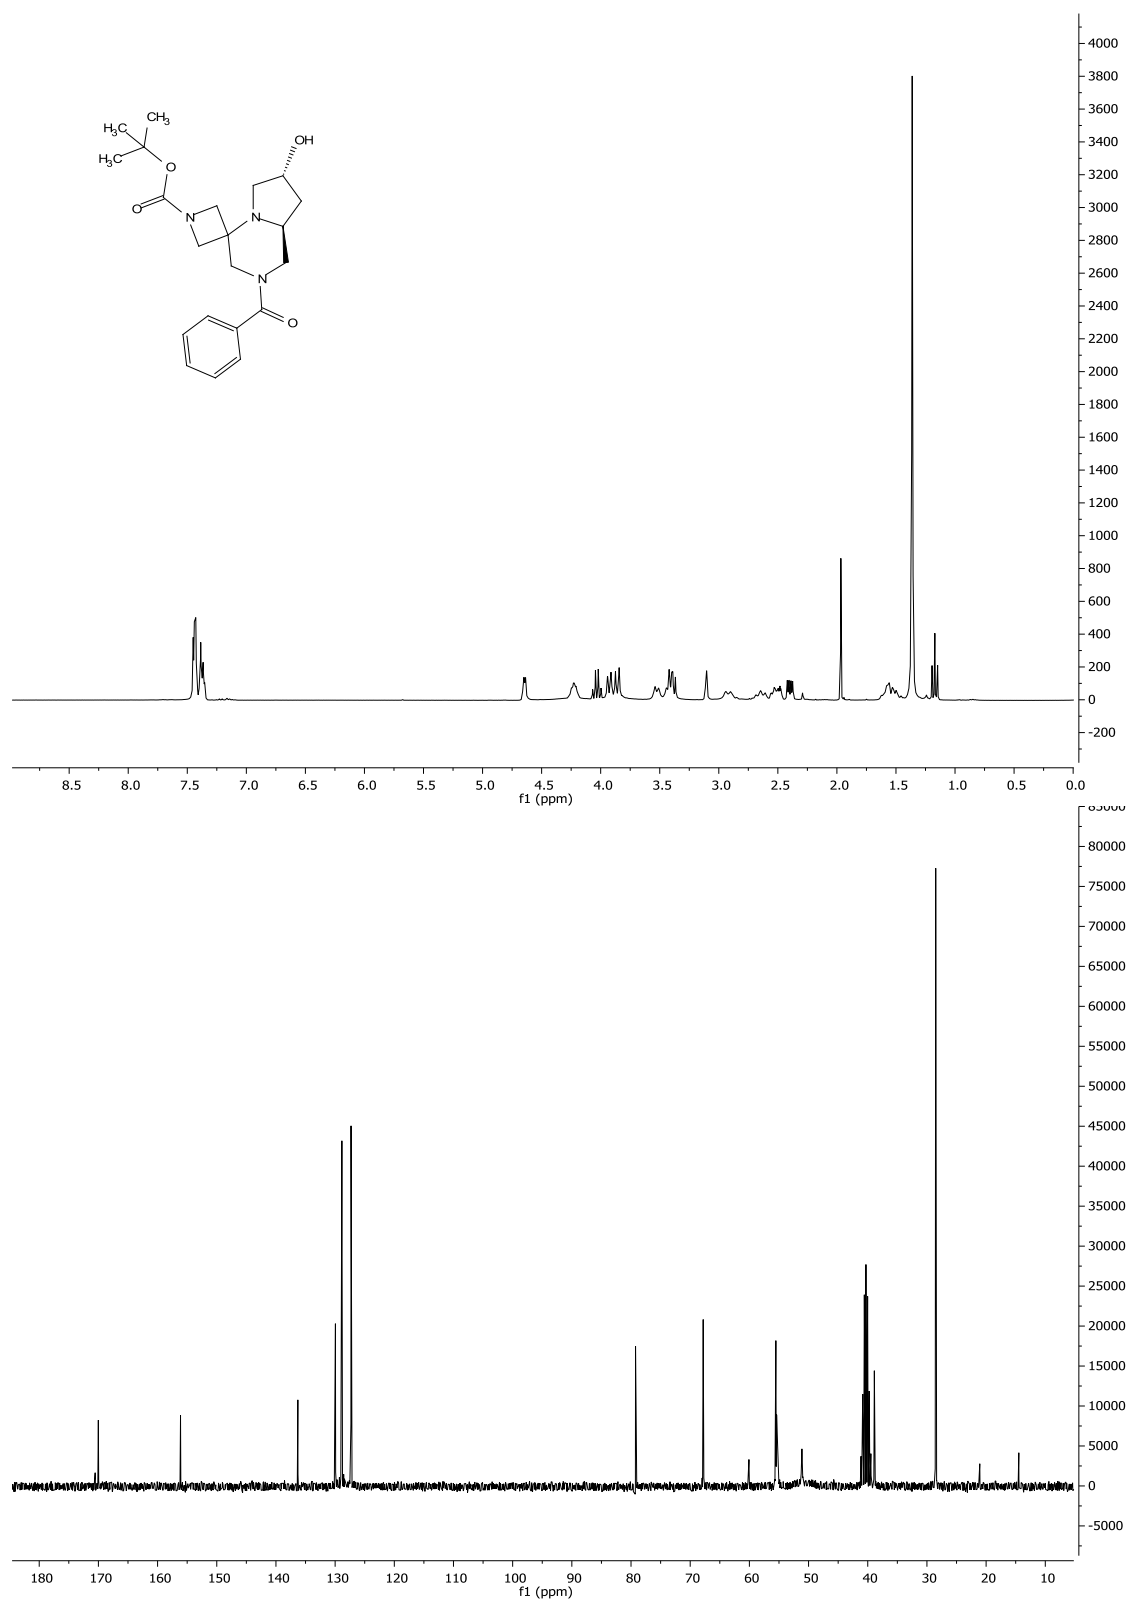

# Compound 5{4}

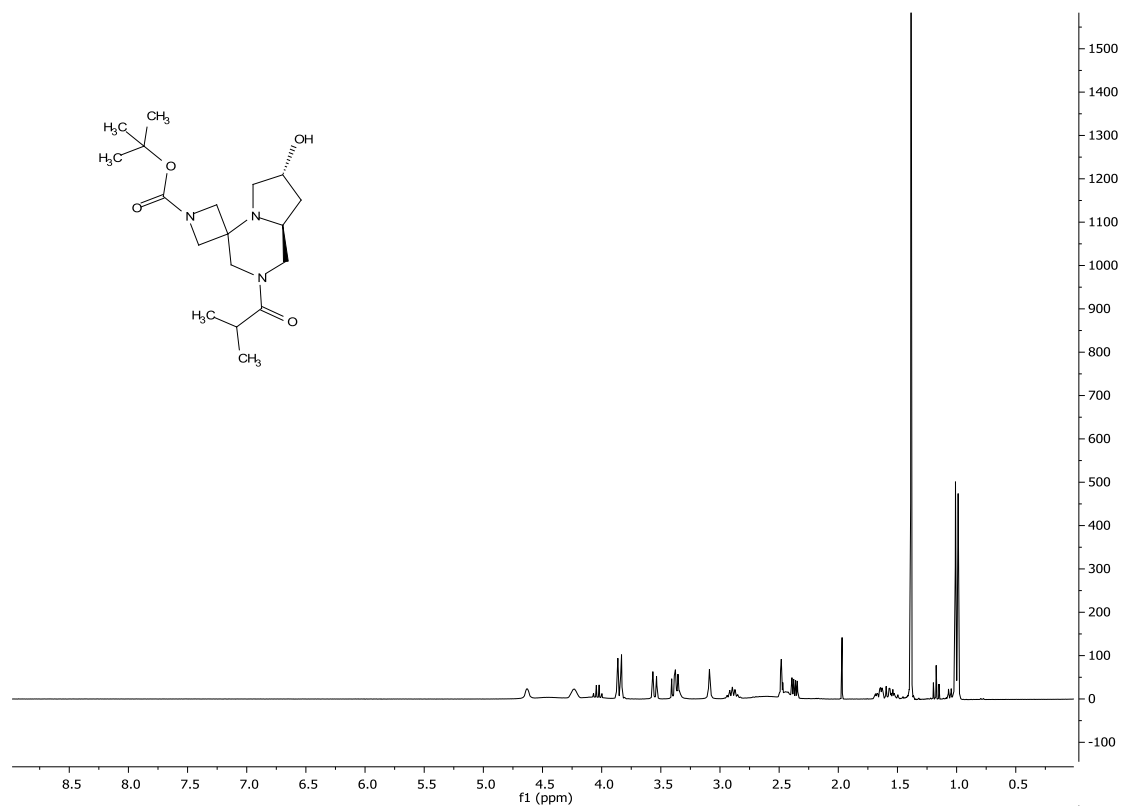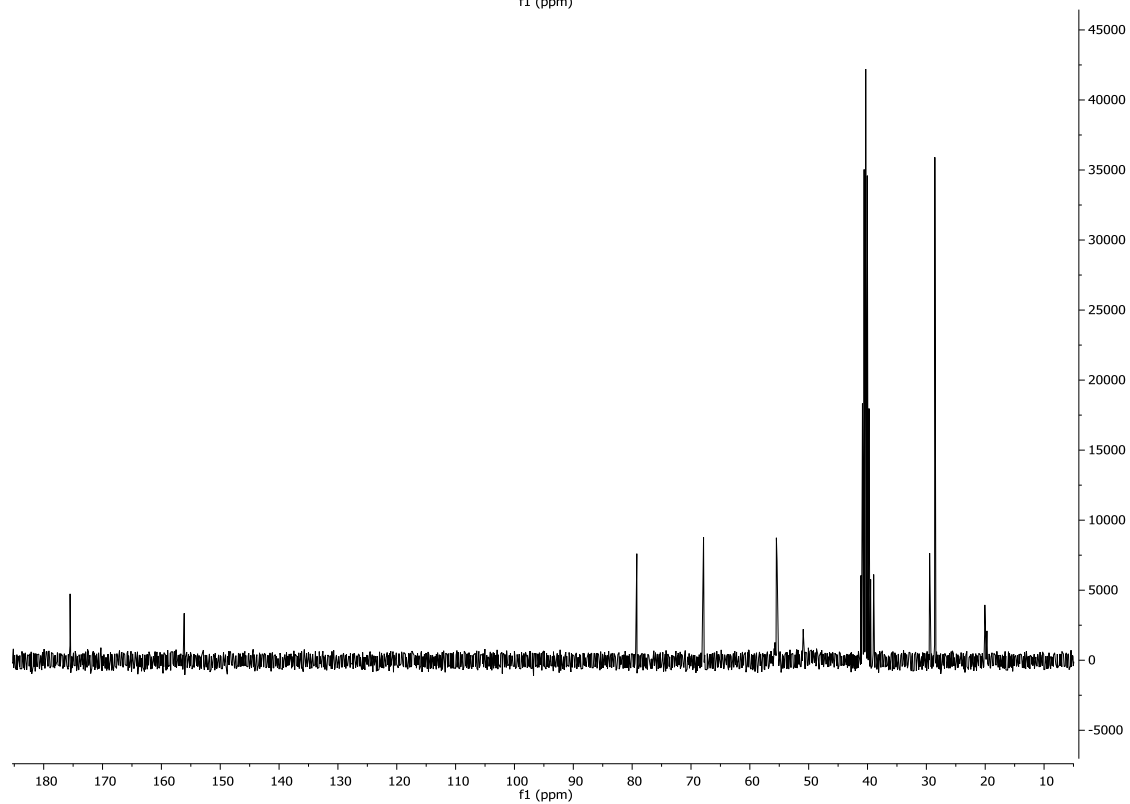

## Compound 5{8}

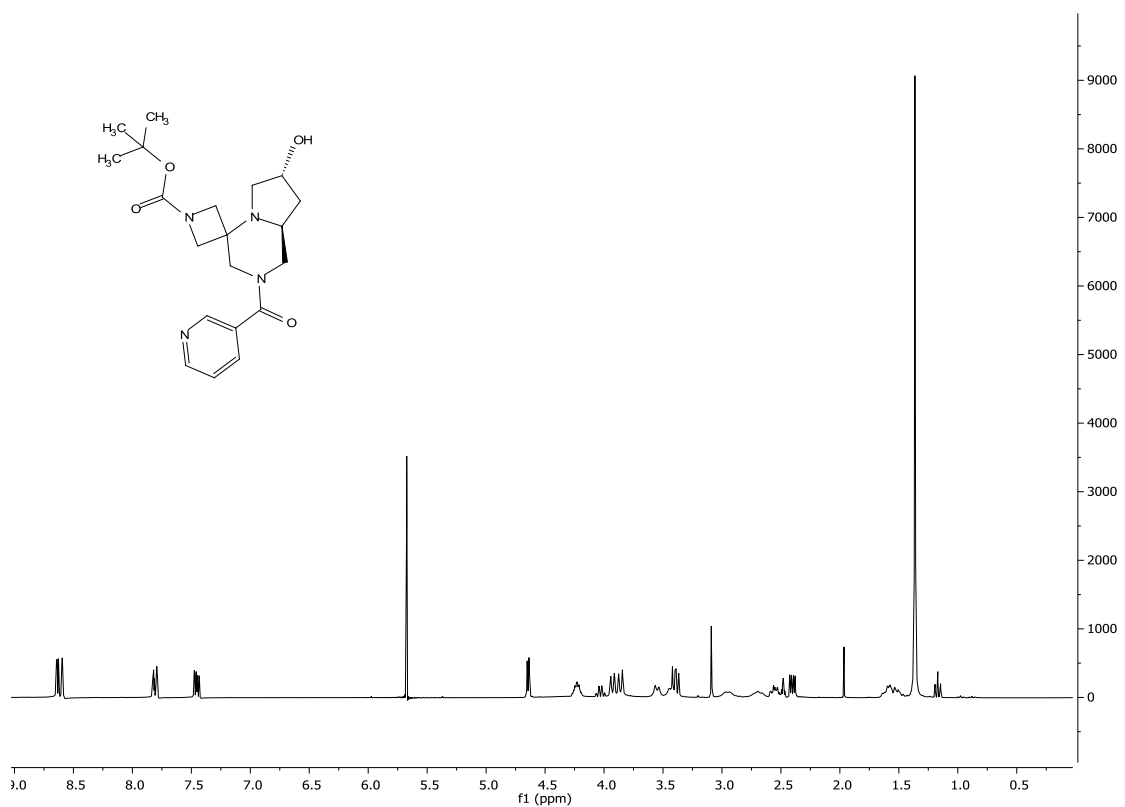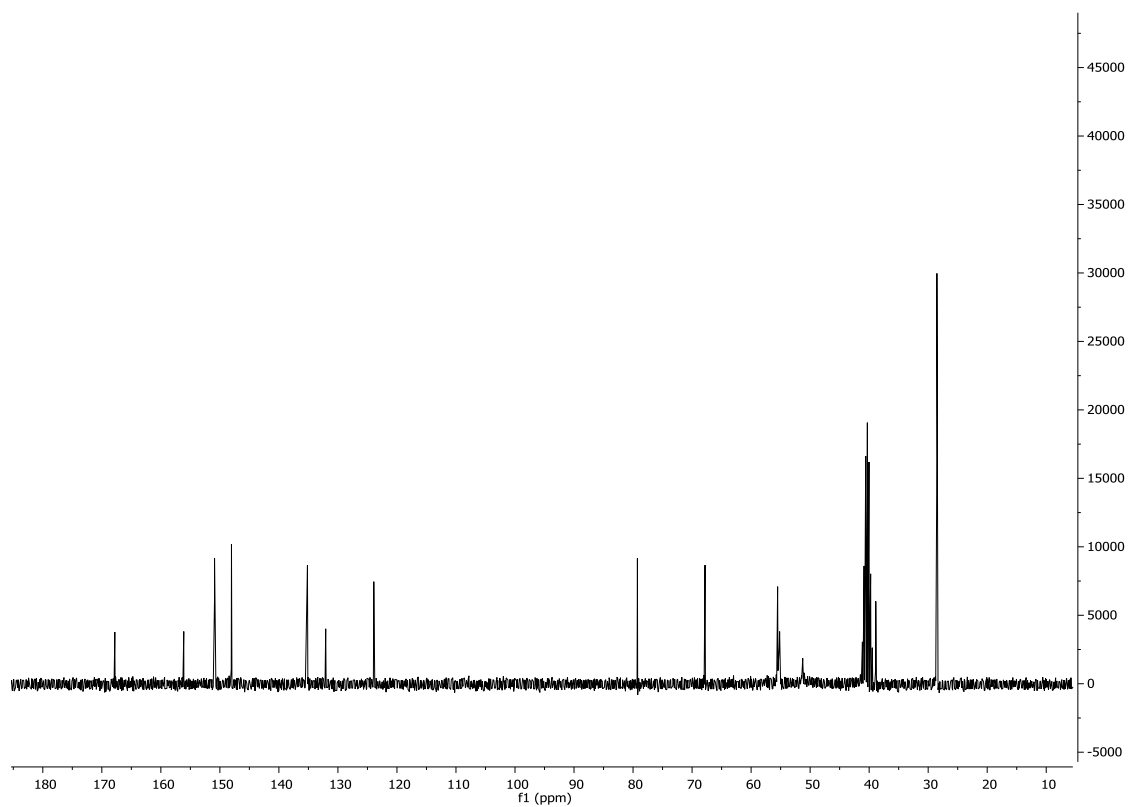

# Compound 5{9}

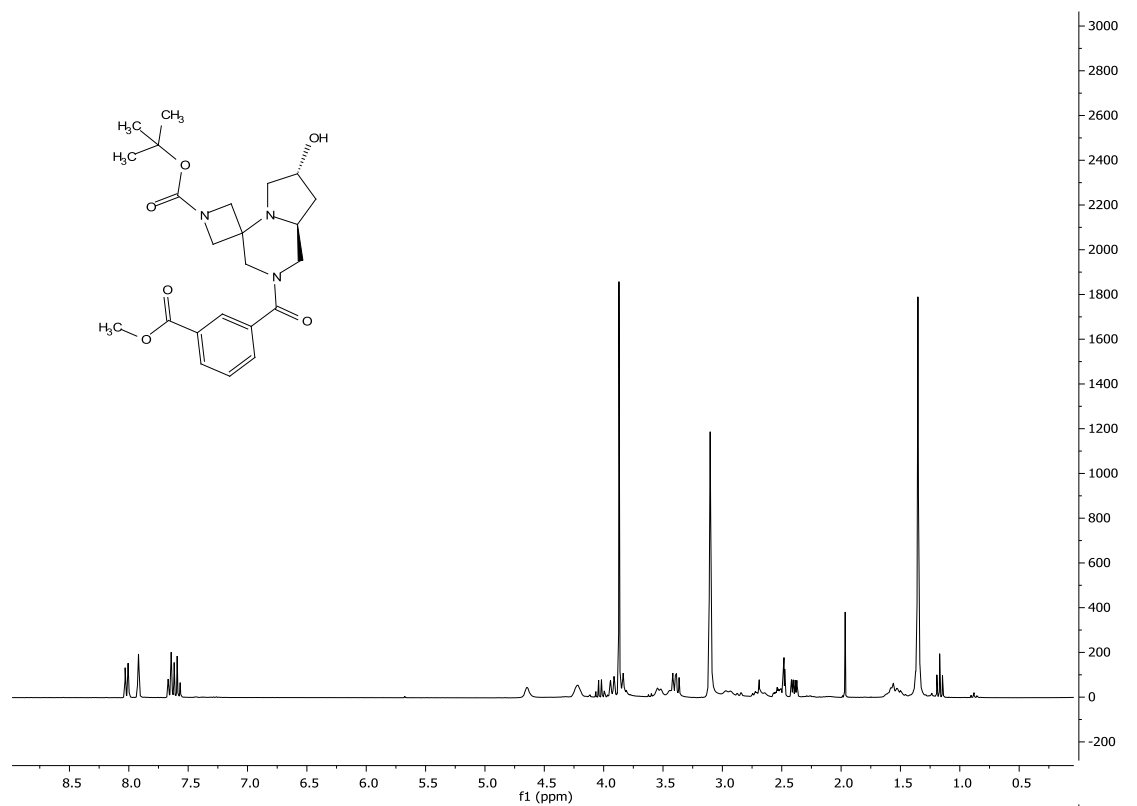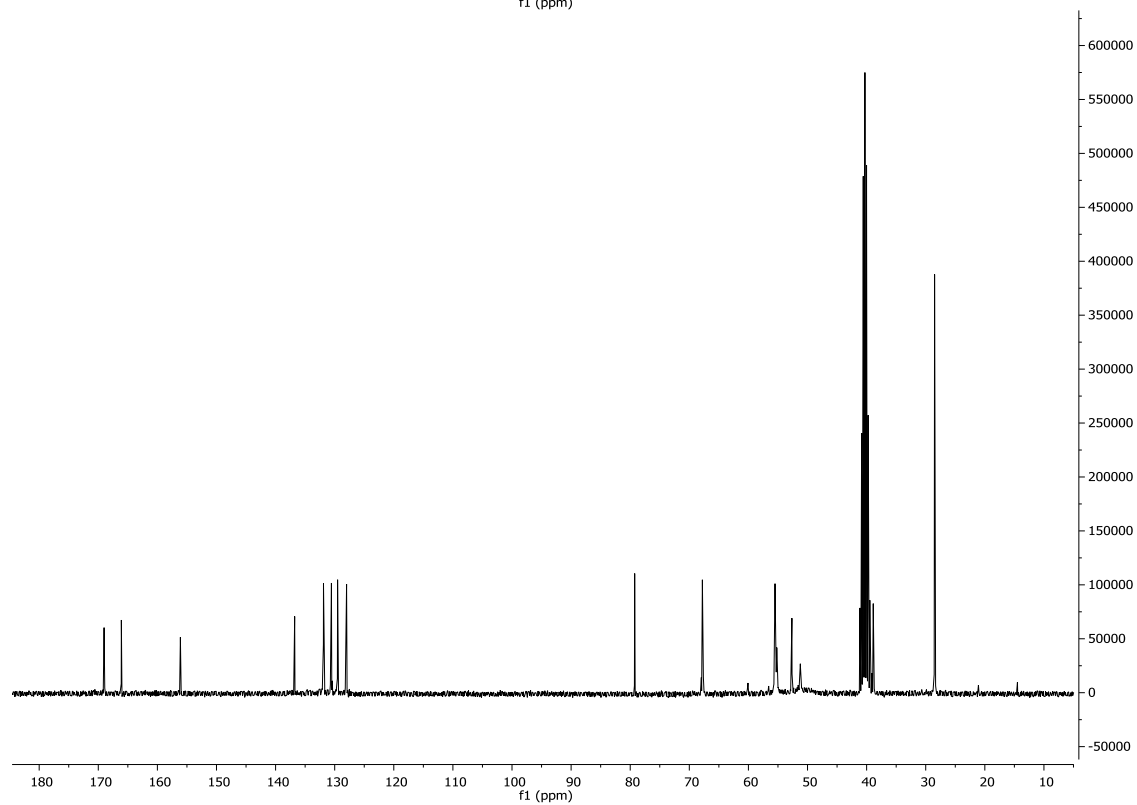

## Compound 5{7}

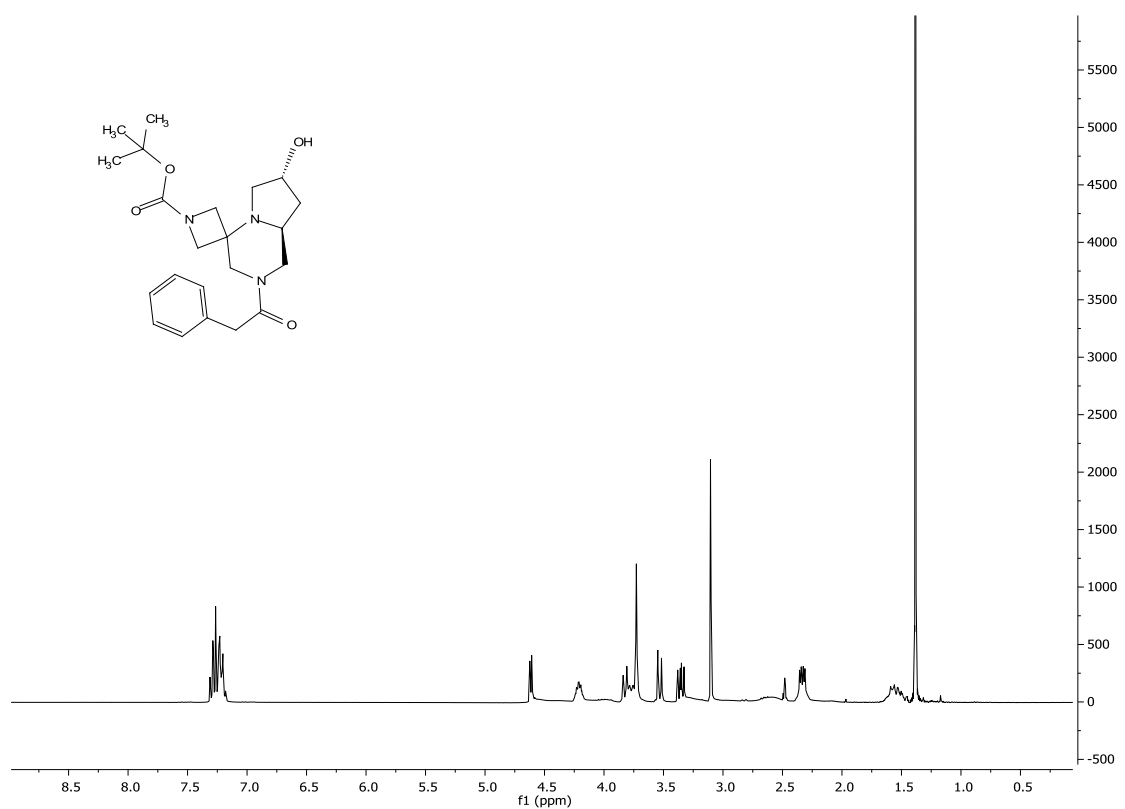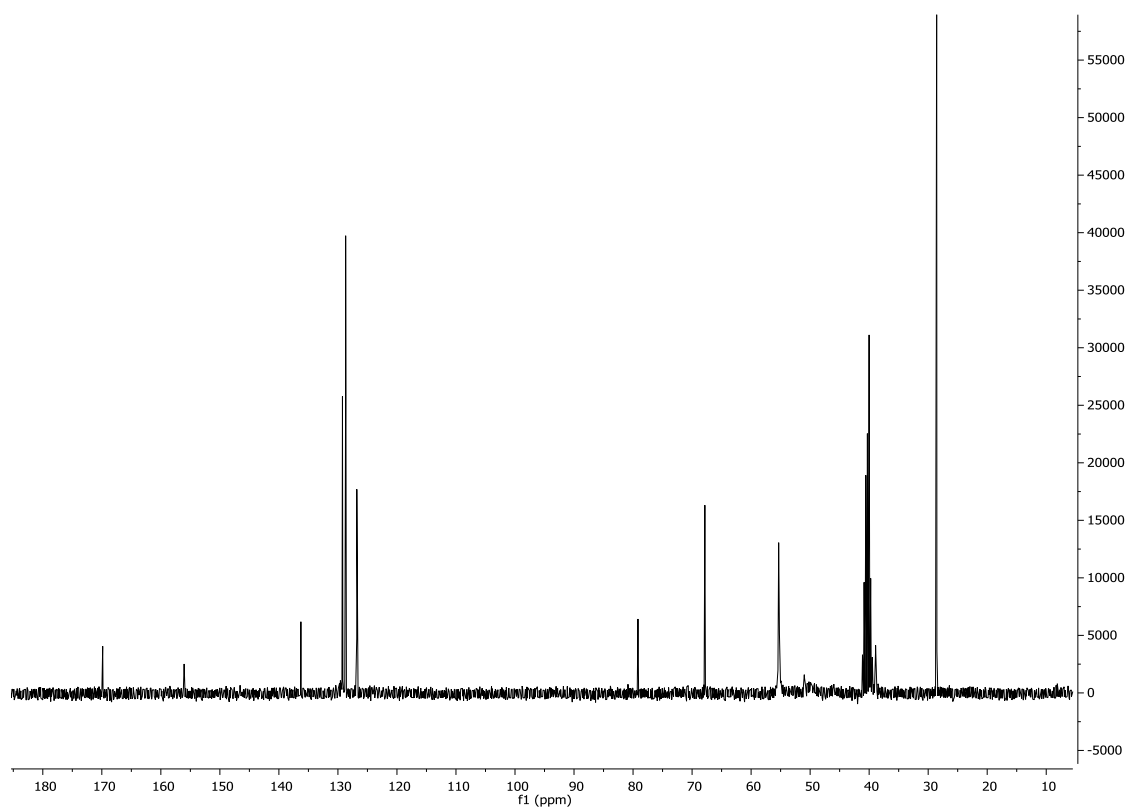

# Compound 5{10}

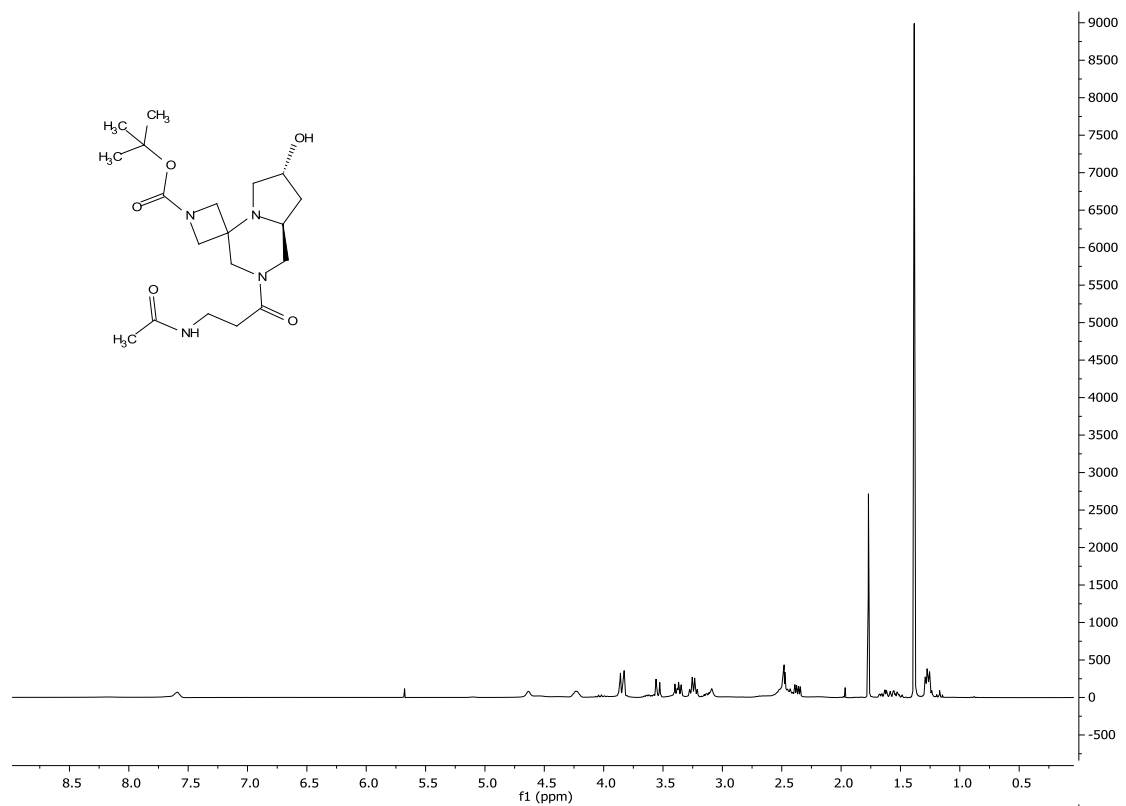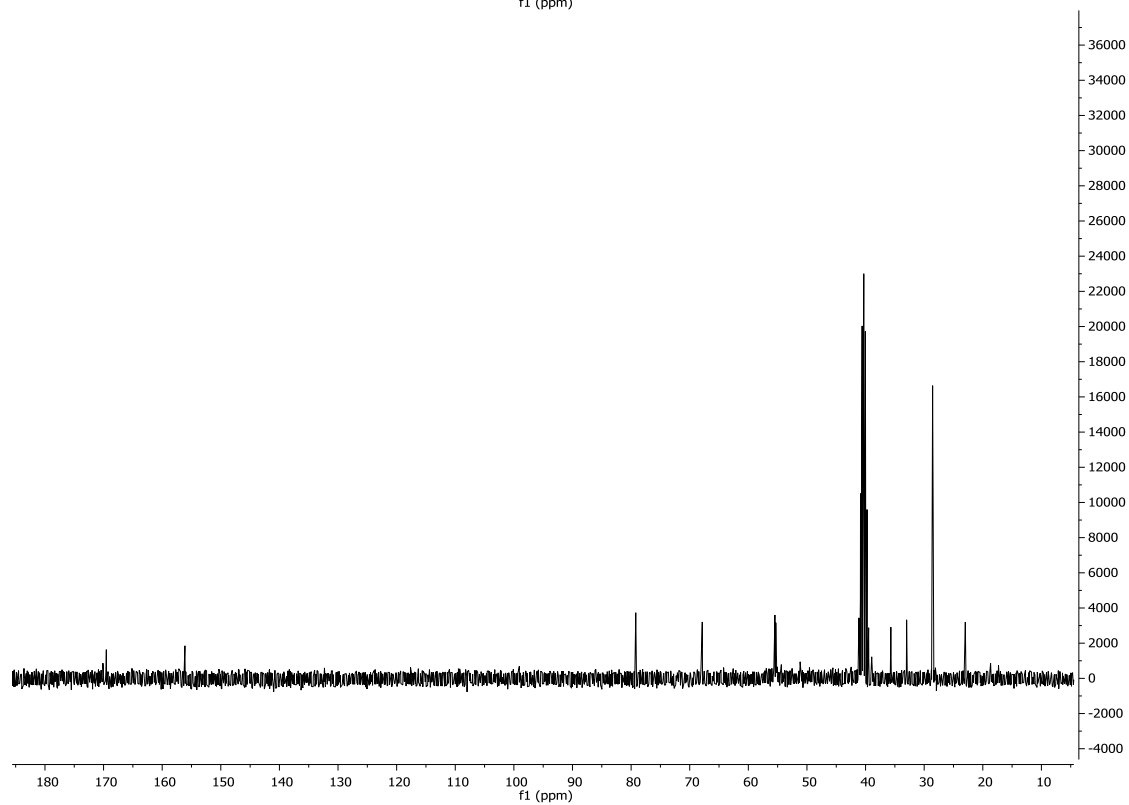

## Compound 5{6}

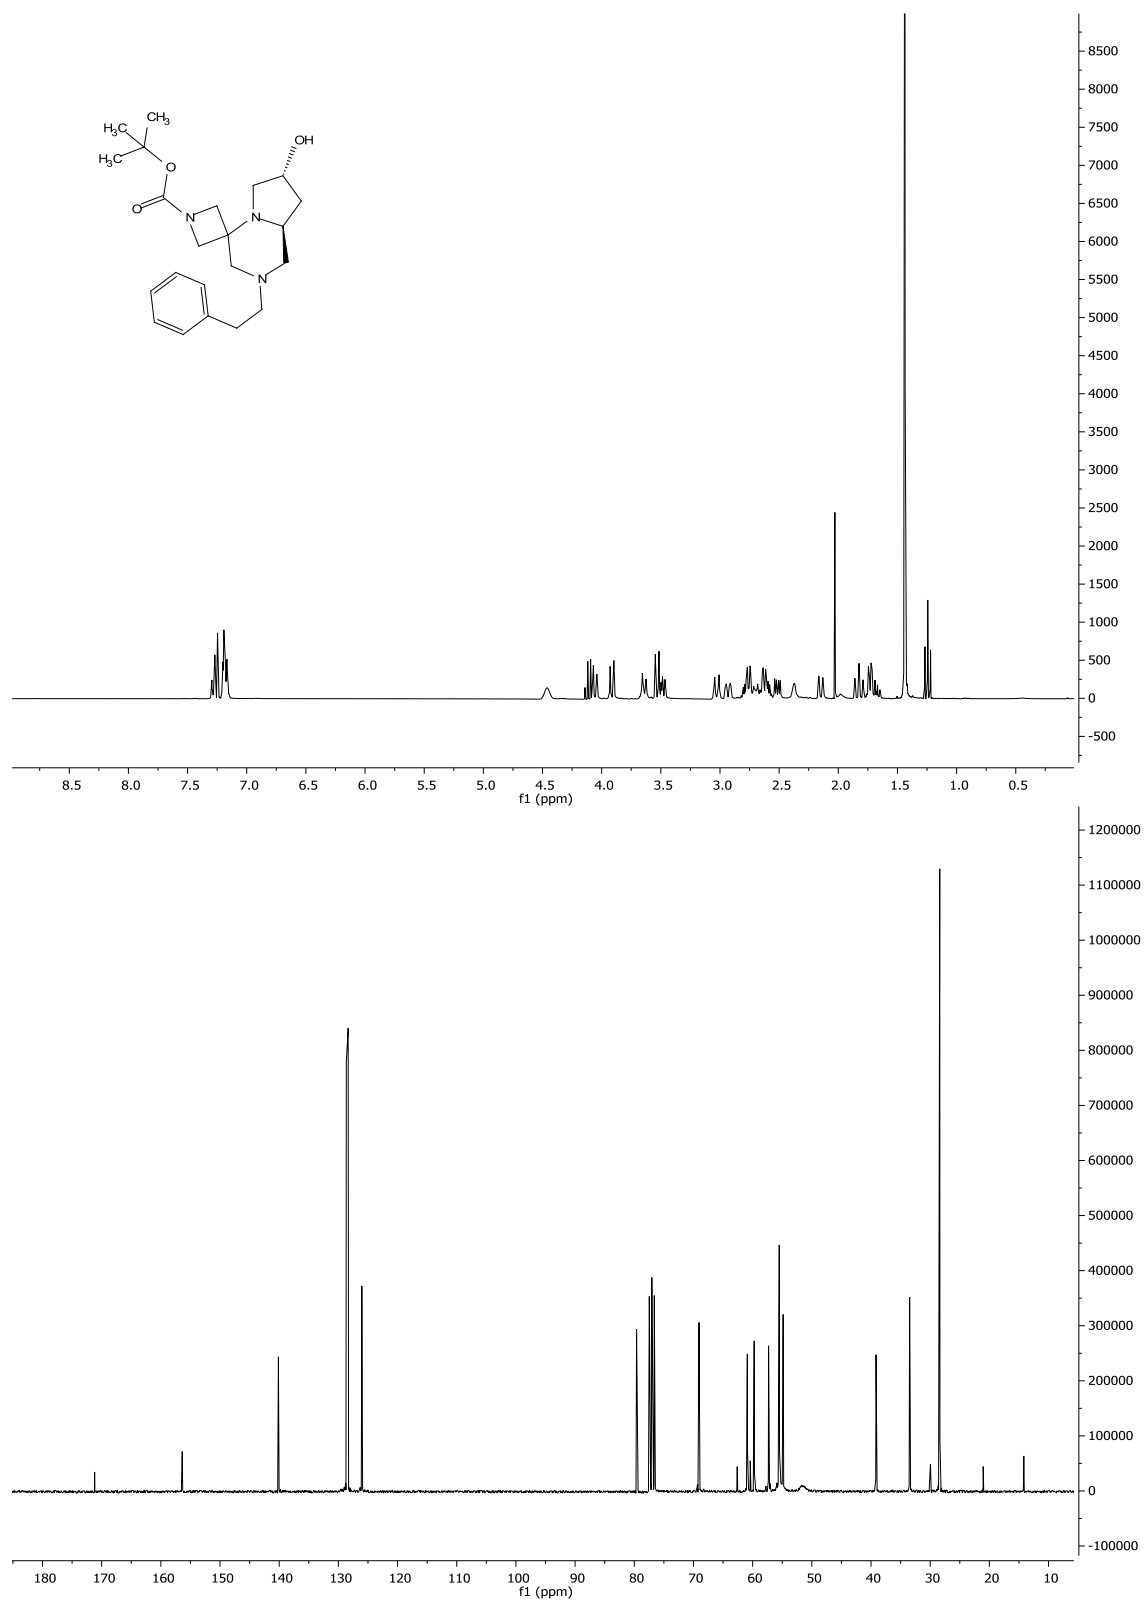



## Compound 5{5}

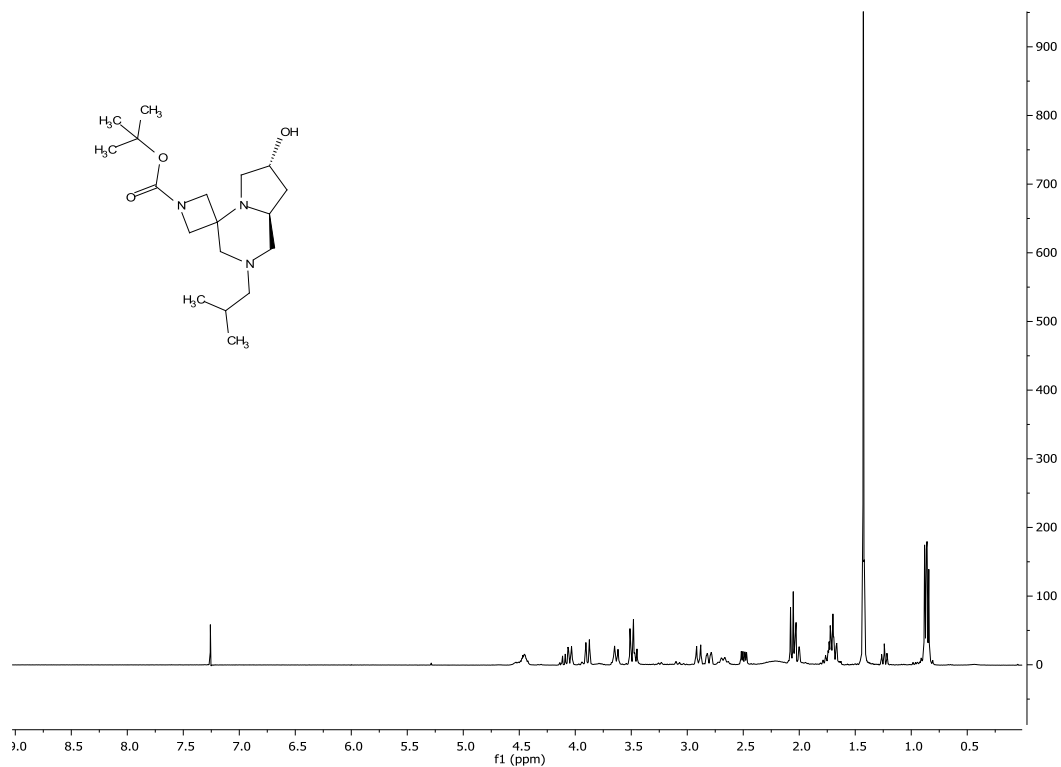

## Compound 5{1}

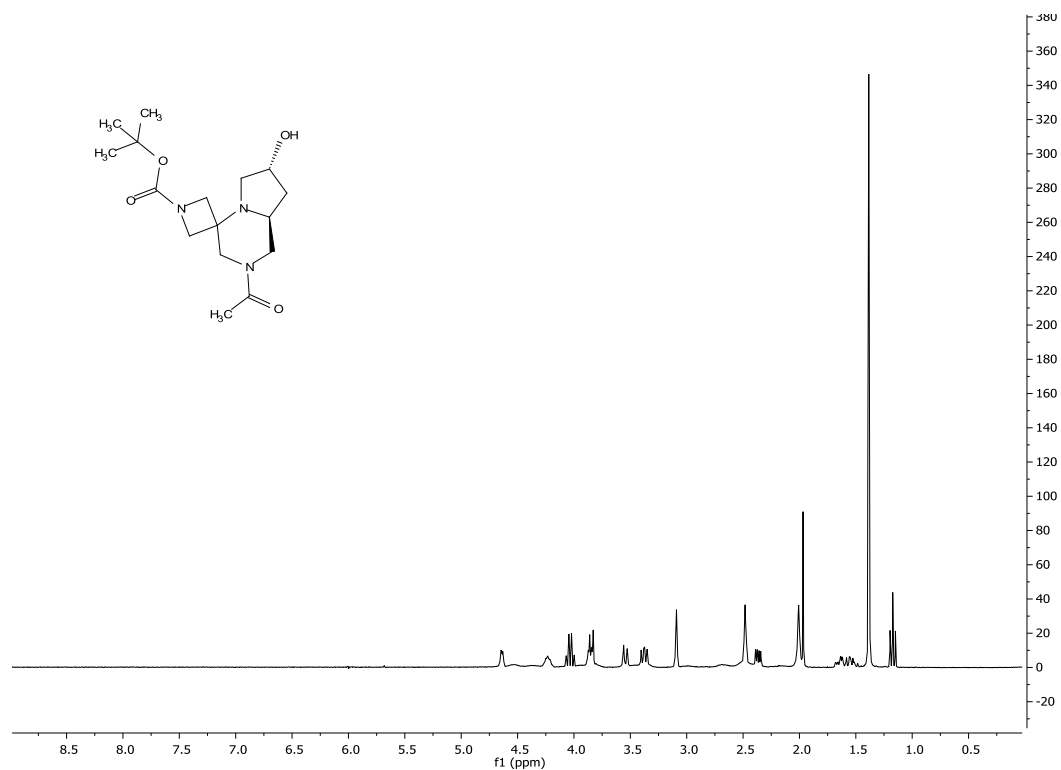

## Compound 5{2}

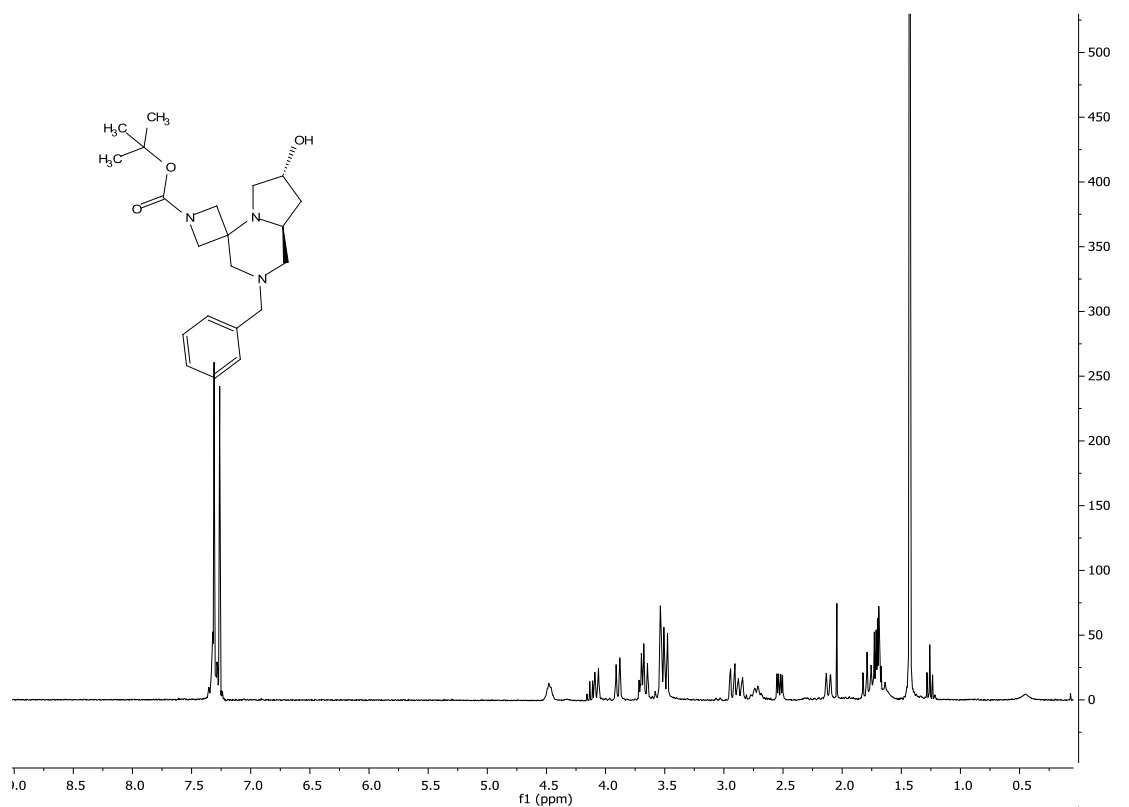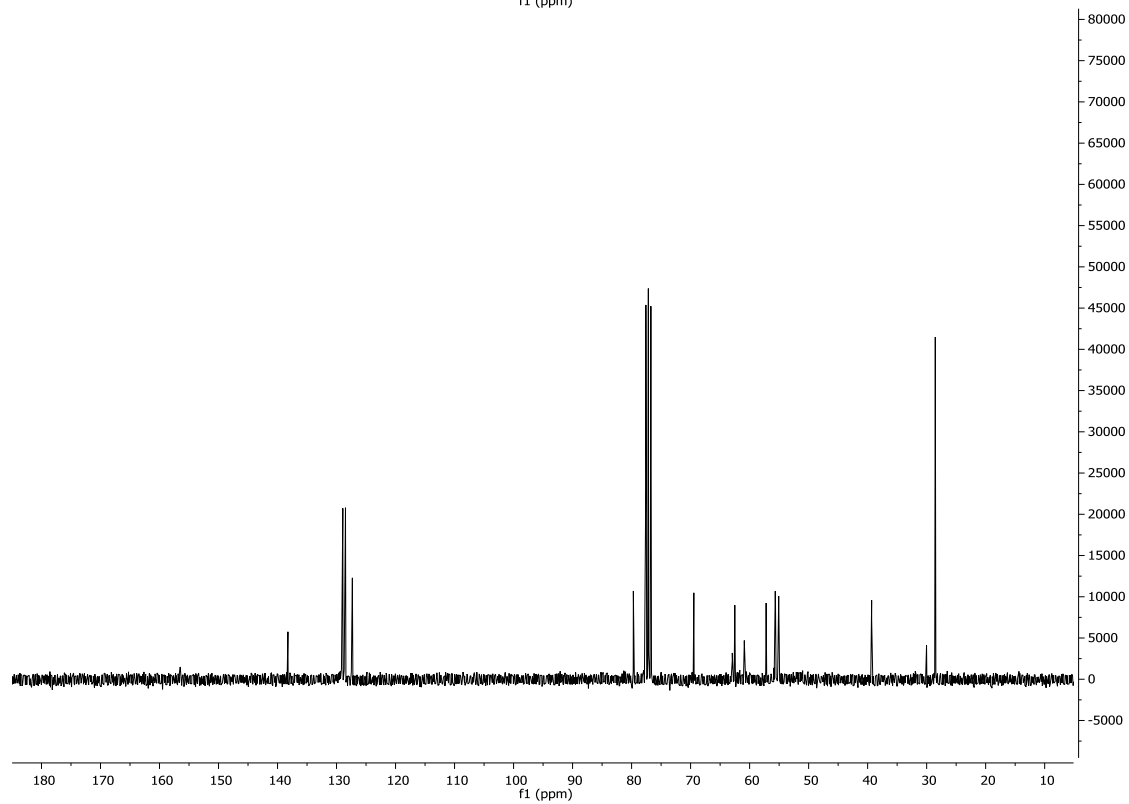

# Compound 12{6}

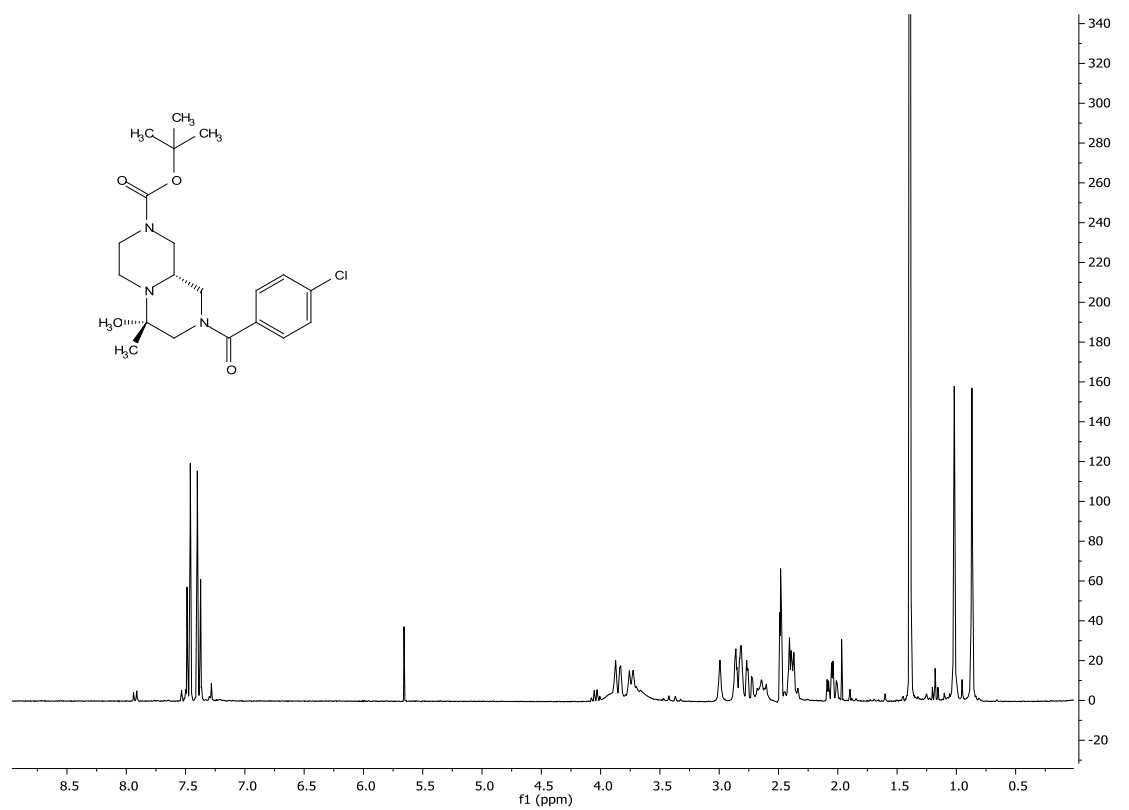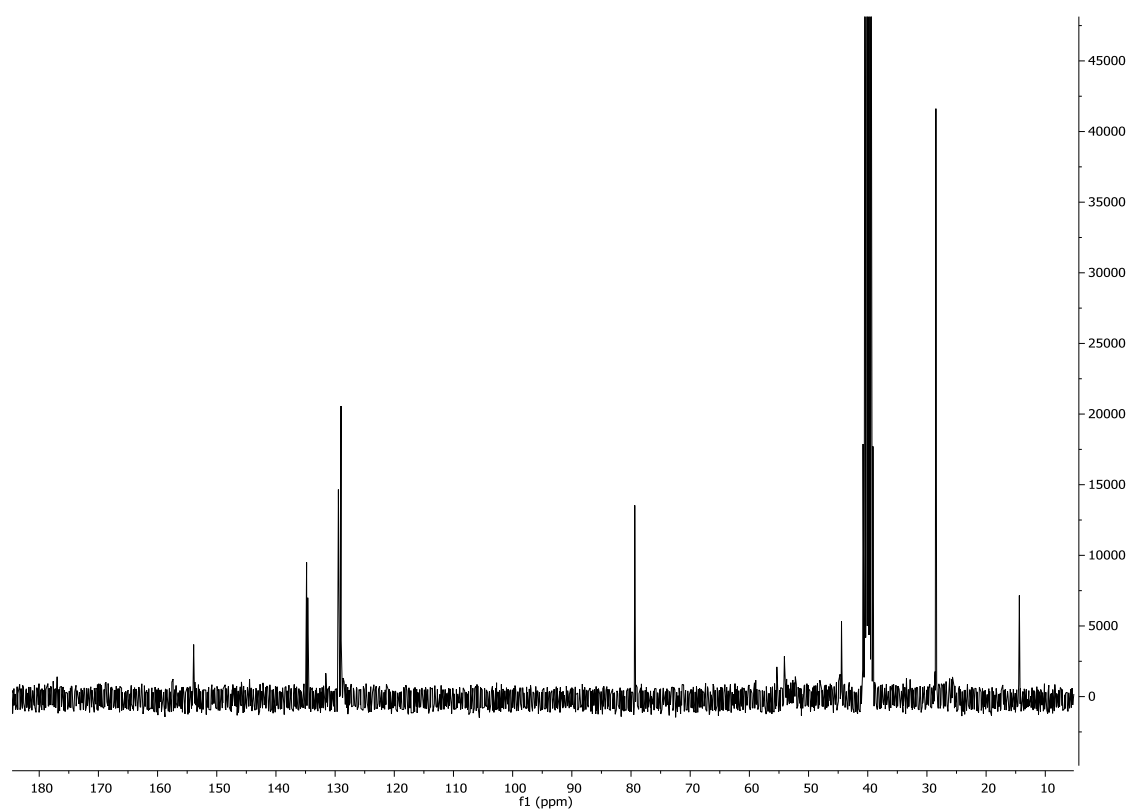

## Compound 12{7}

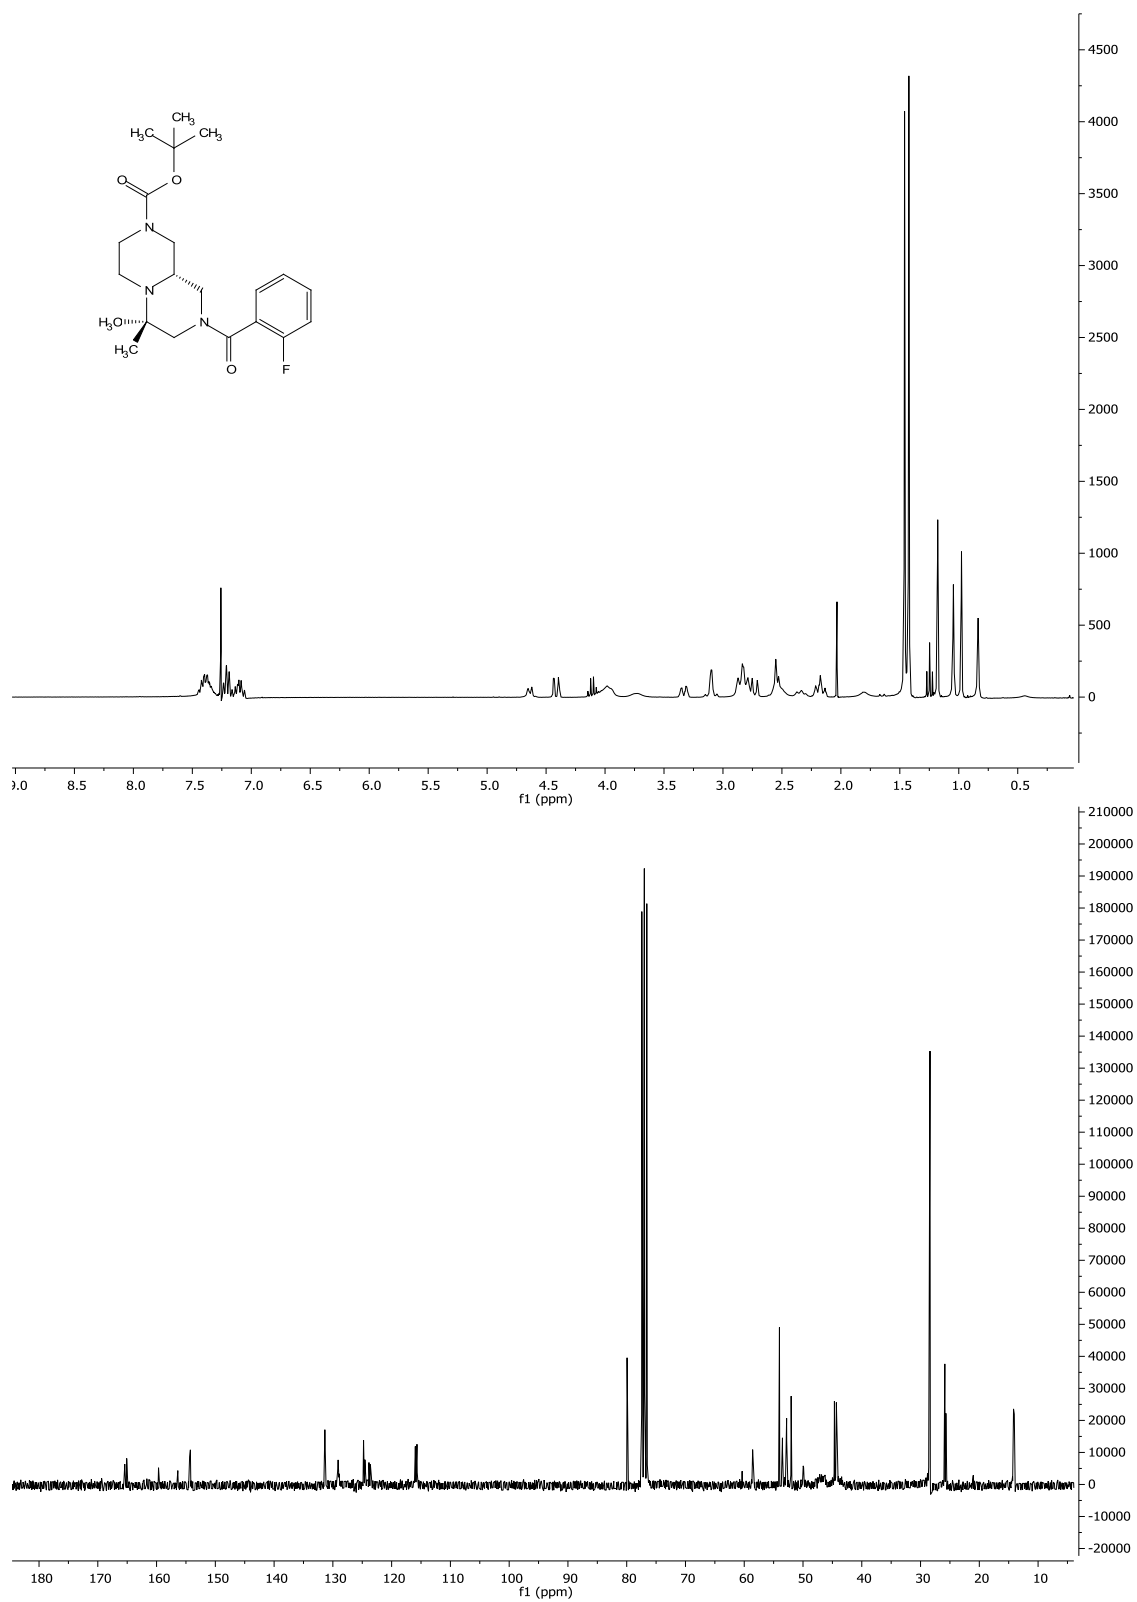

# Compound 12{3}

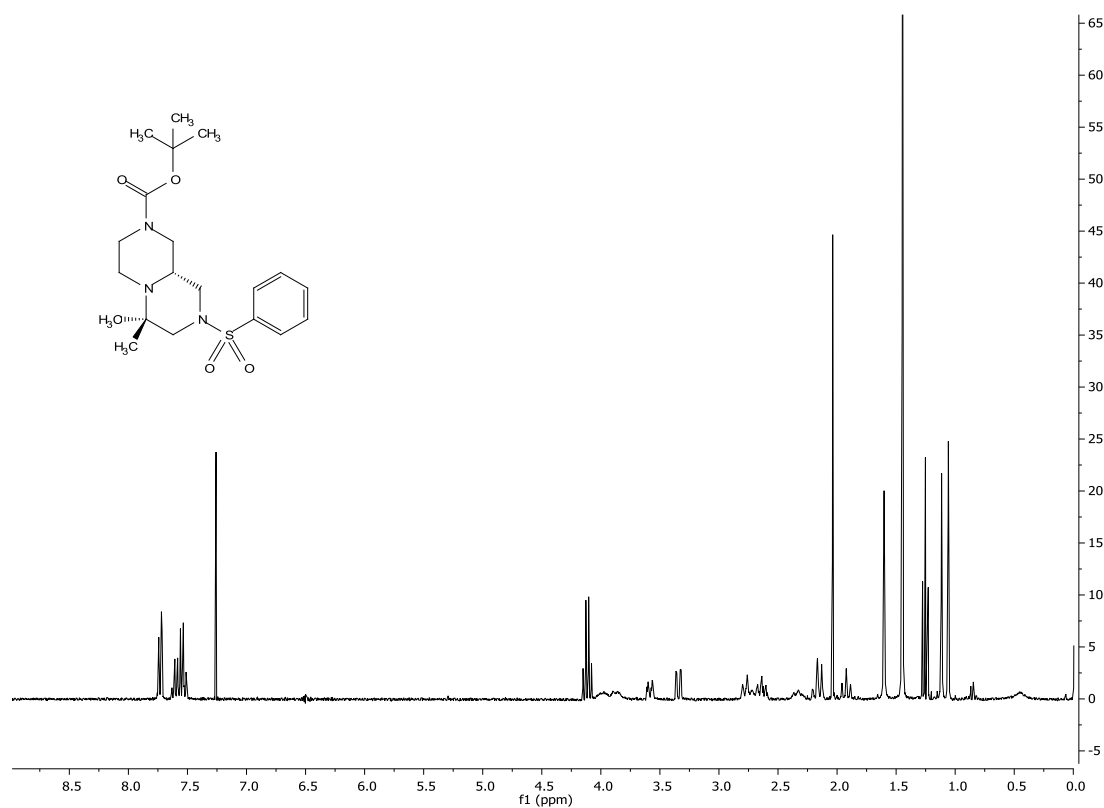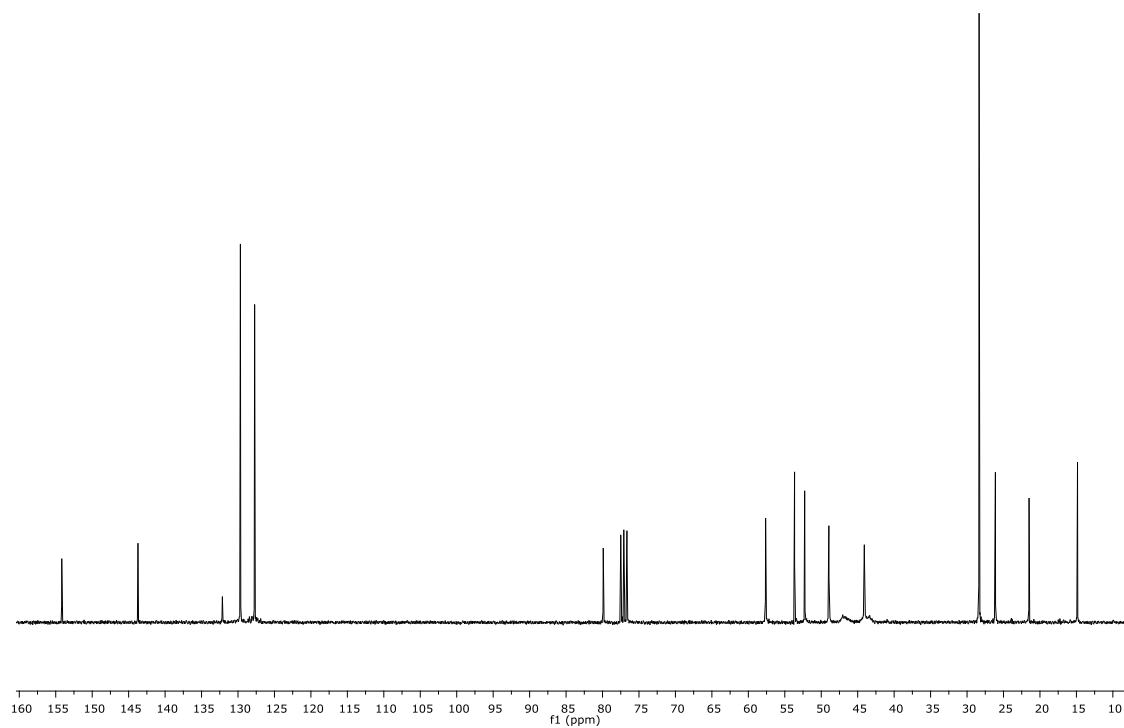

## Compound 12{4}

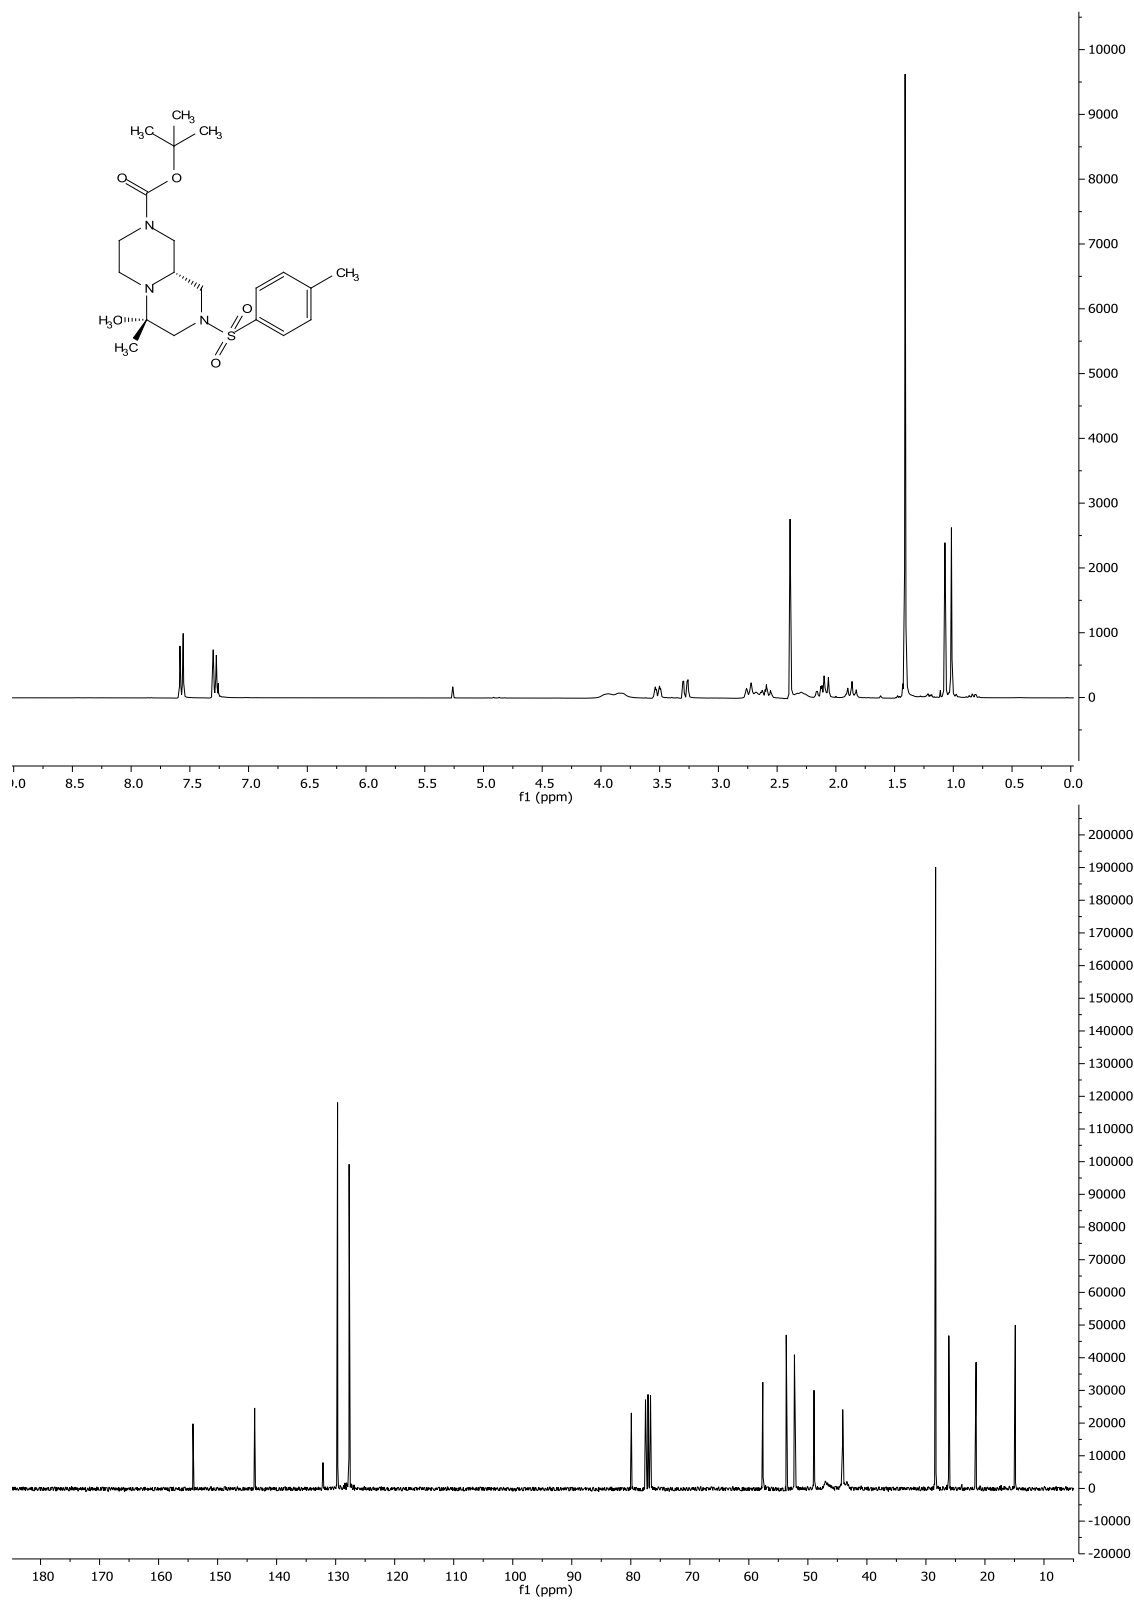

# Compound 12{1}

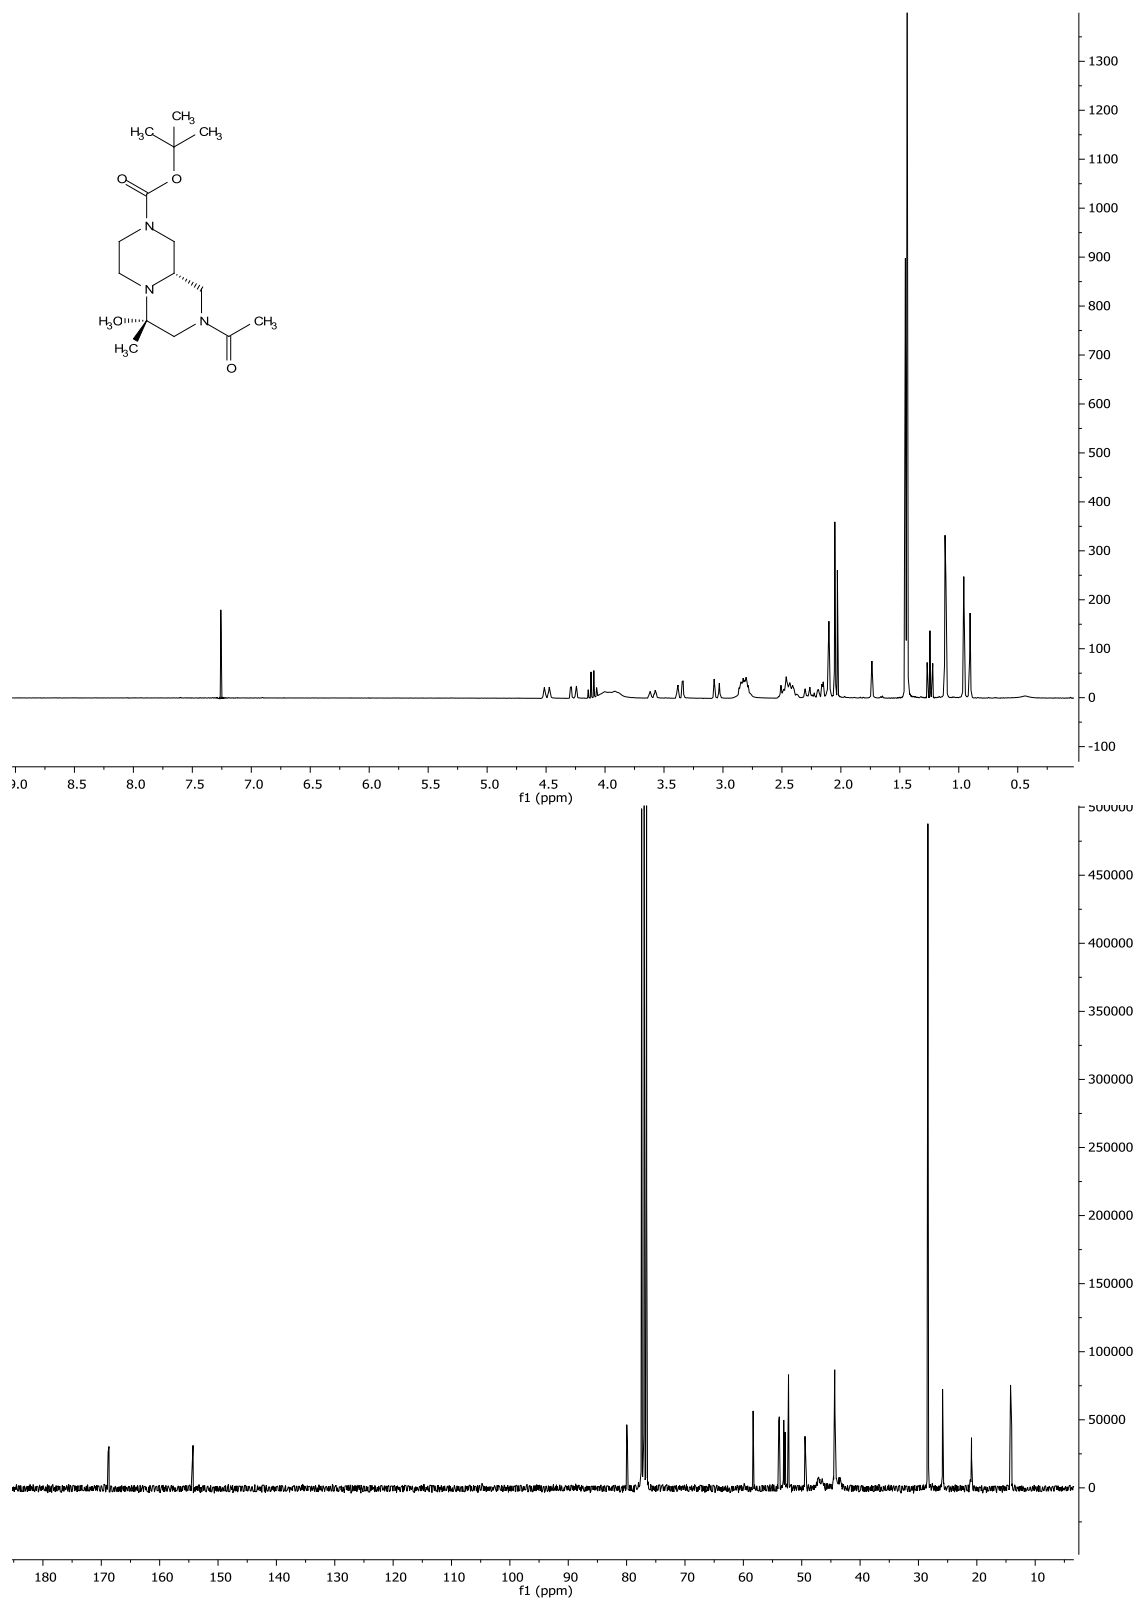

## Compound 12{9}

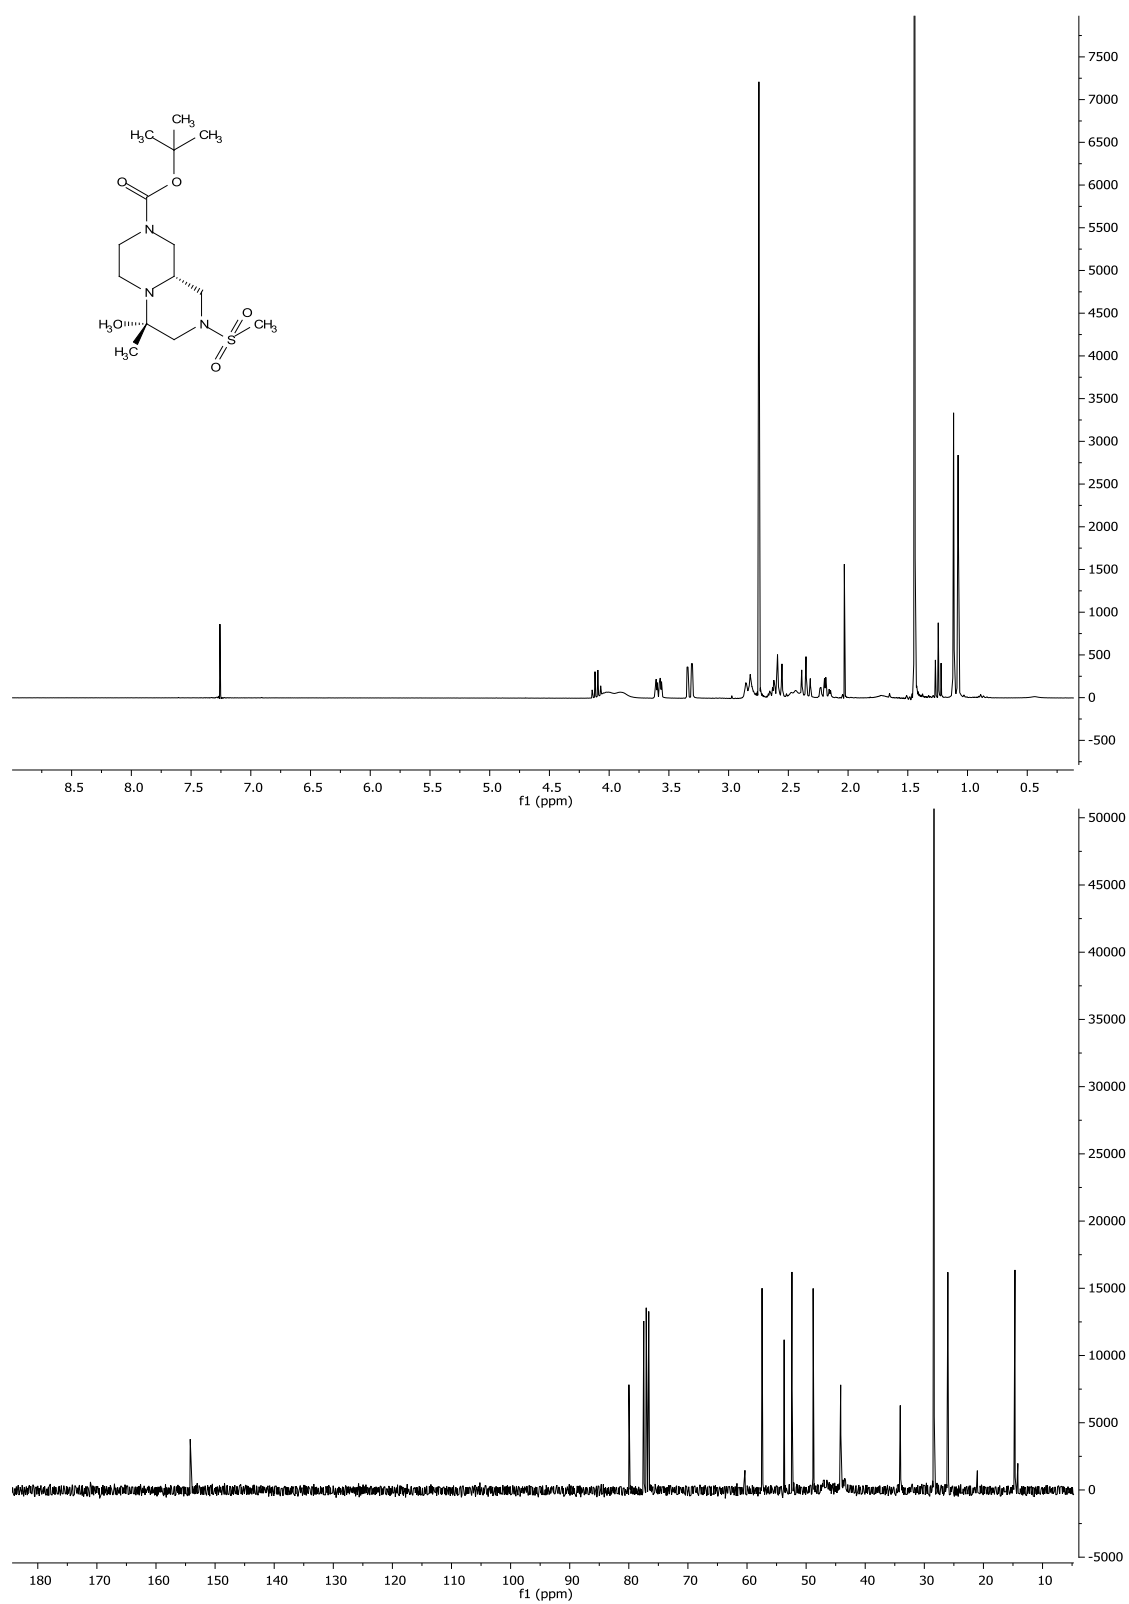



# Compound 12{5}

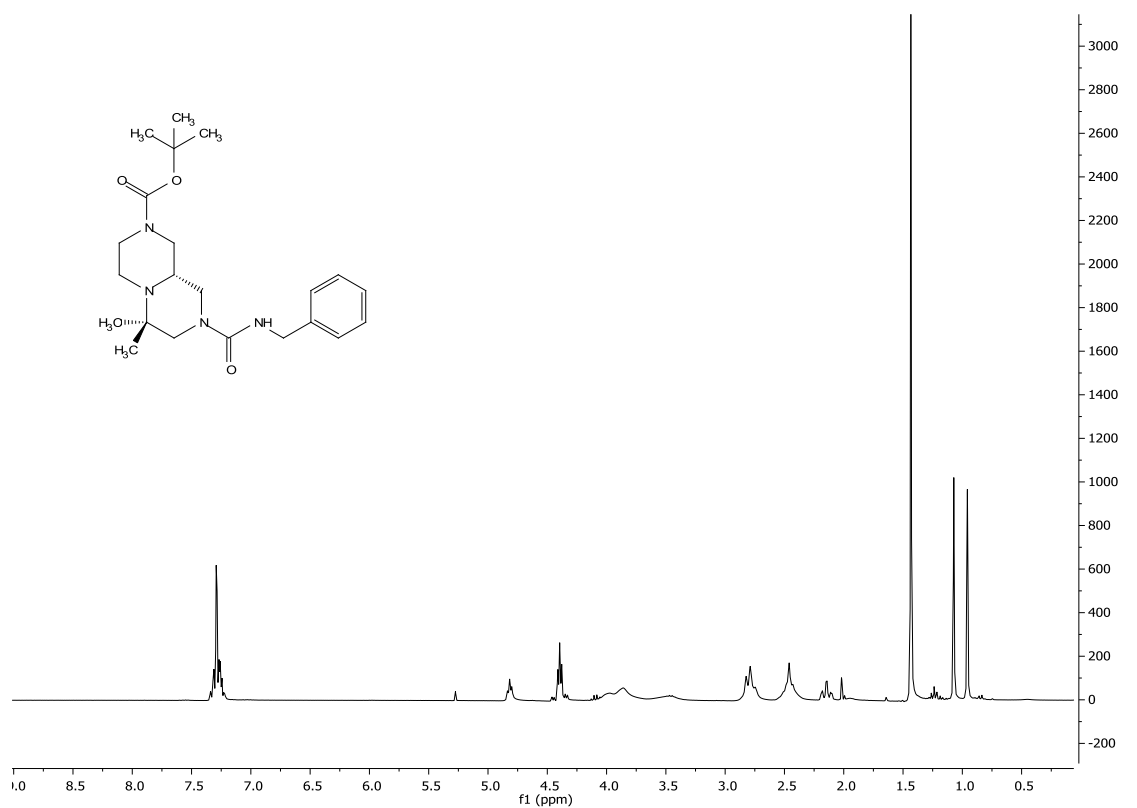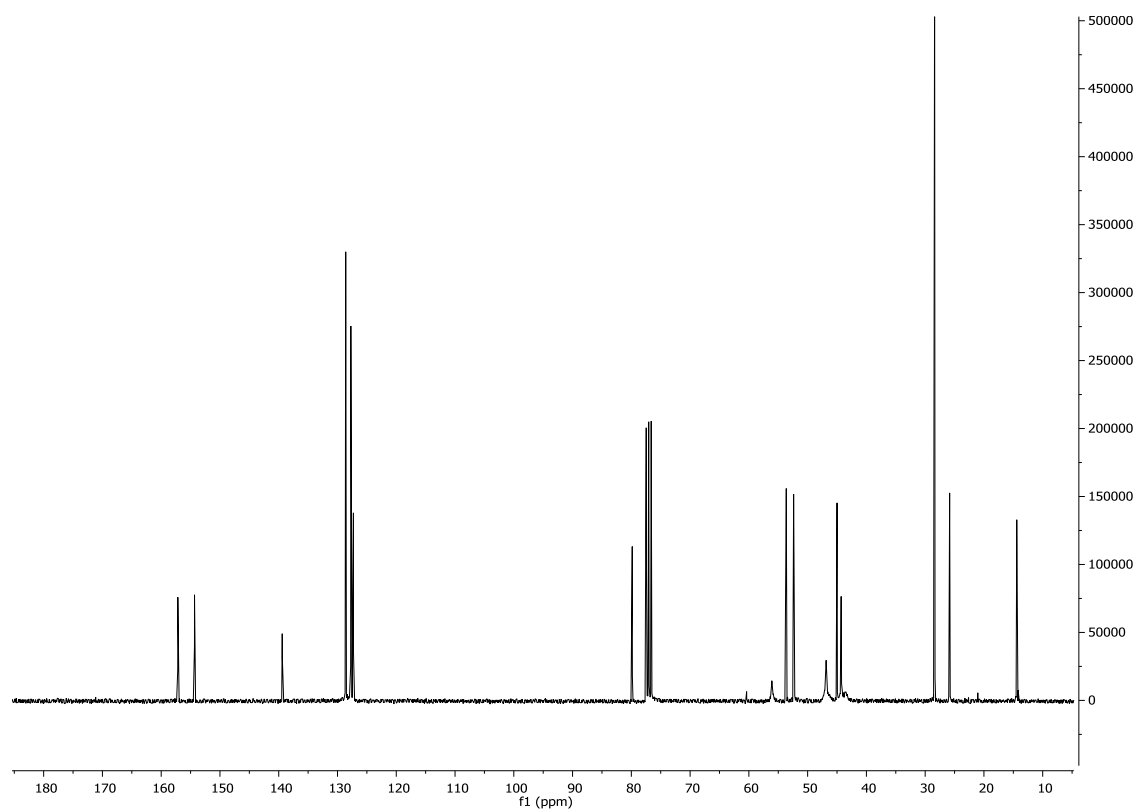

## Compound 12{2}

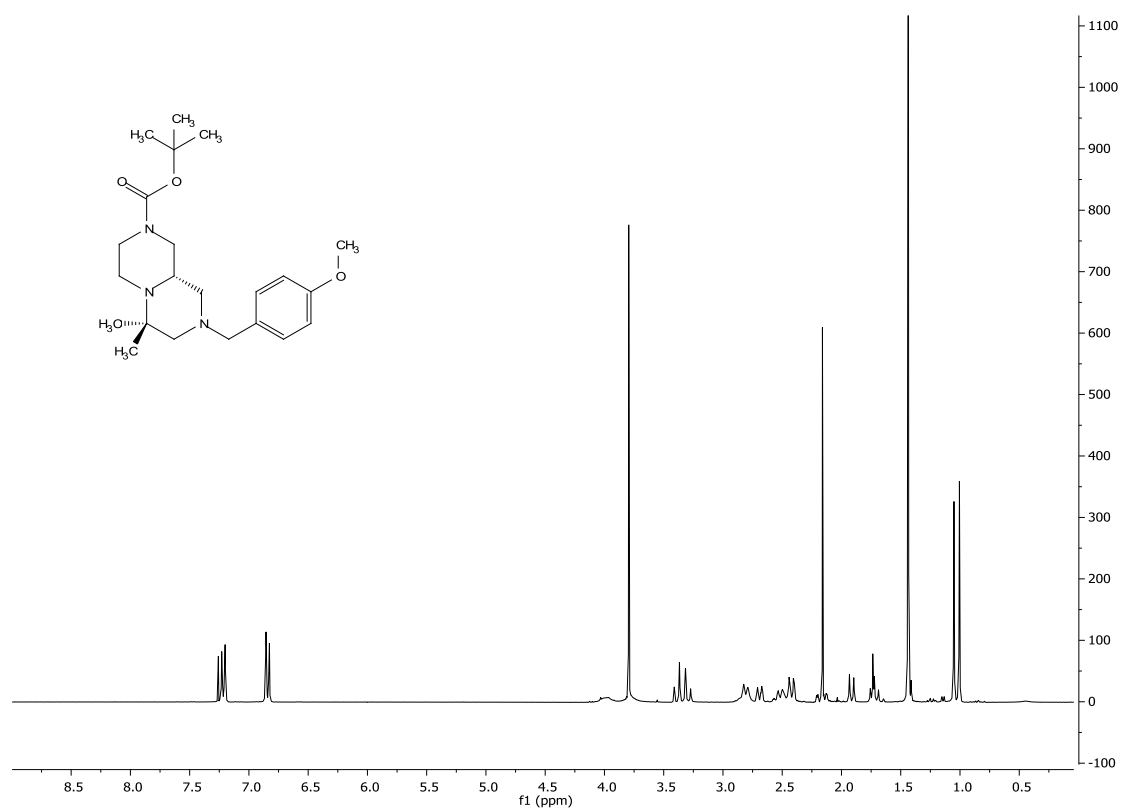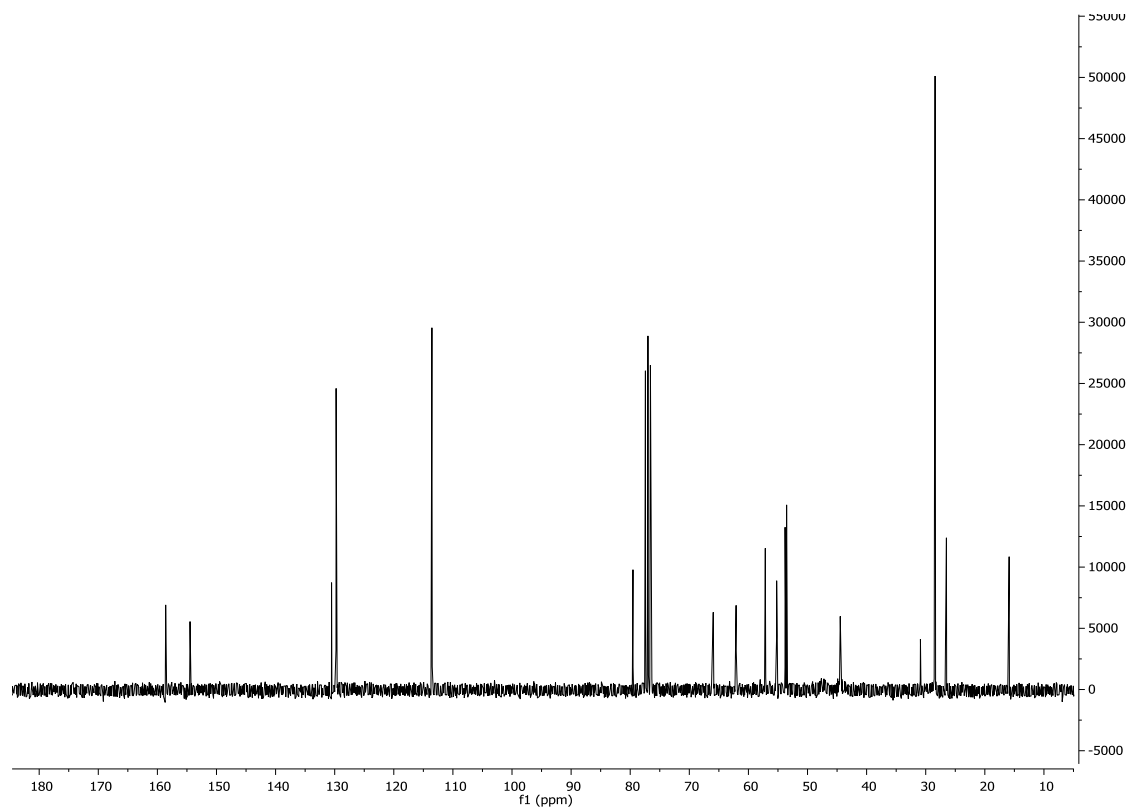

# Compound 12{8}

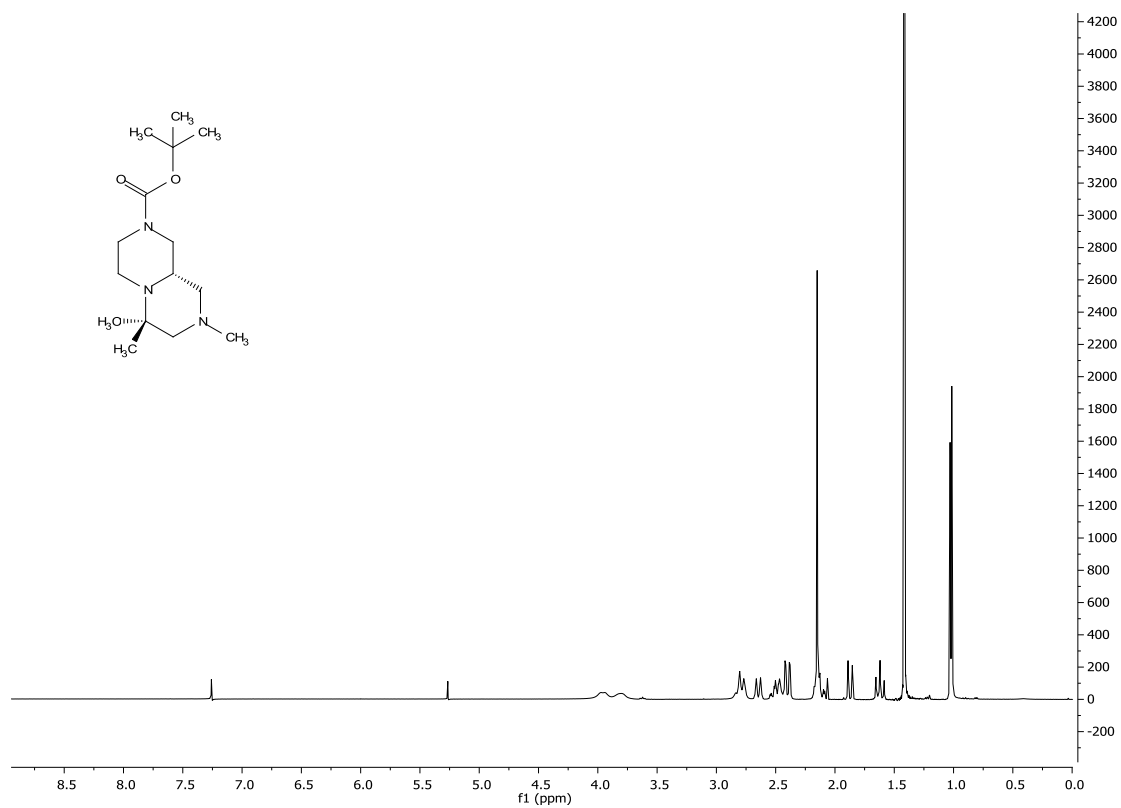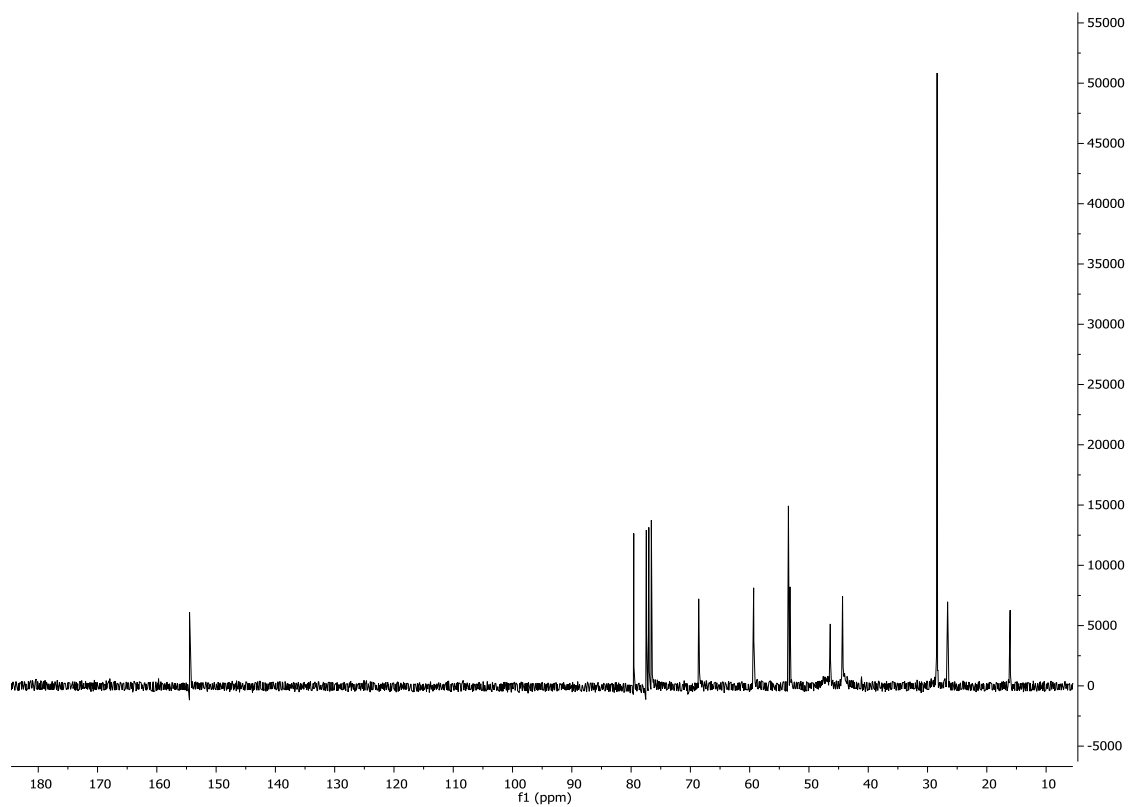

**Compound 14{3}**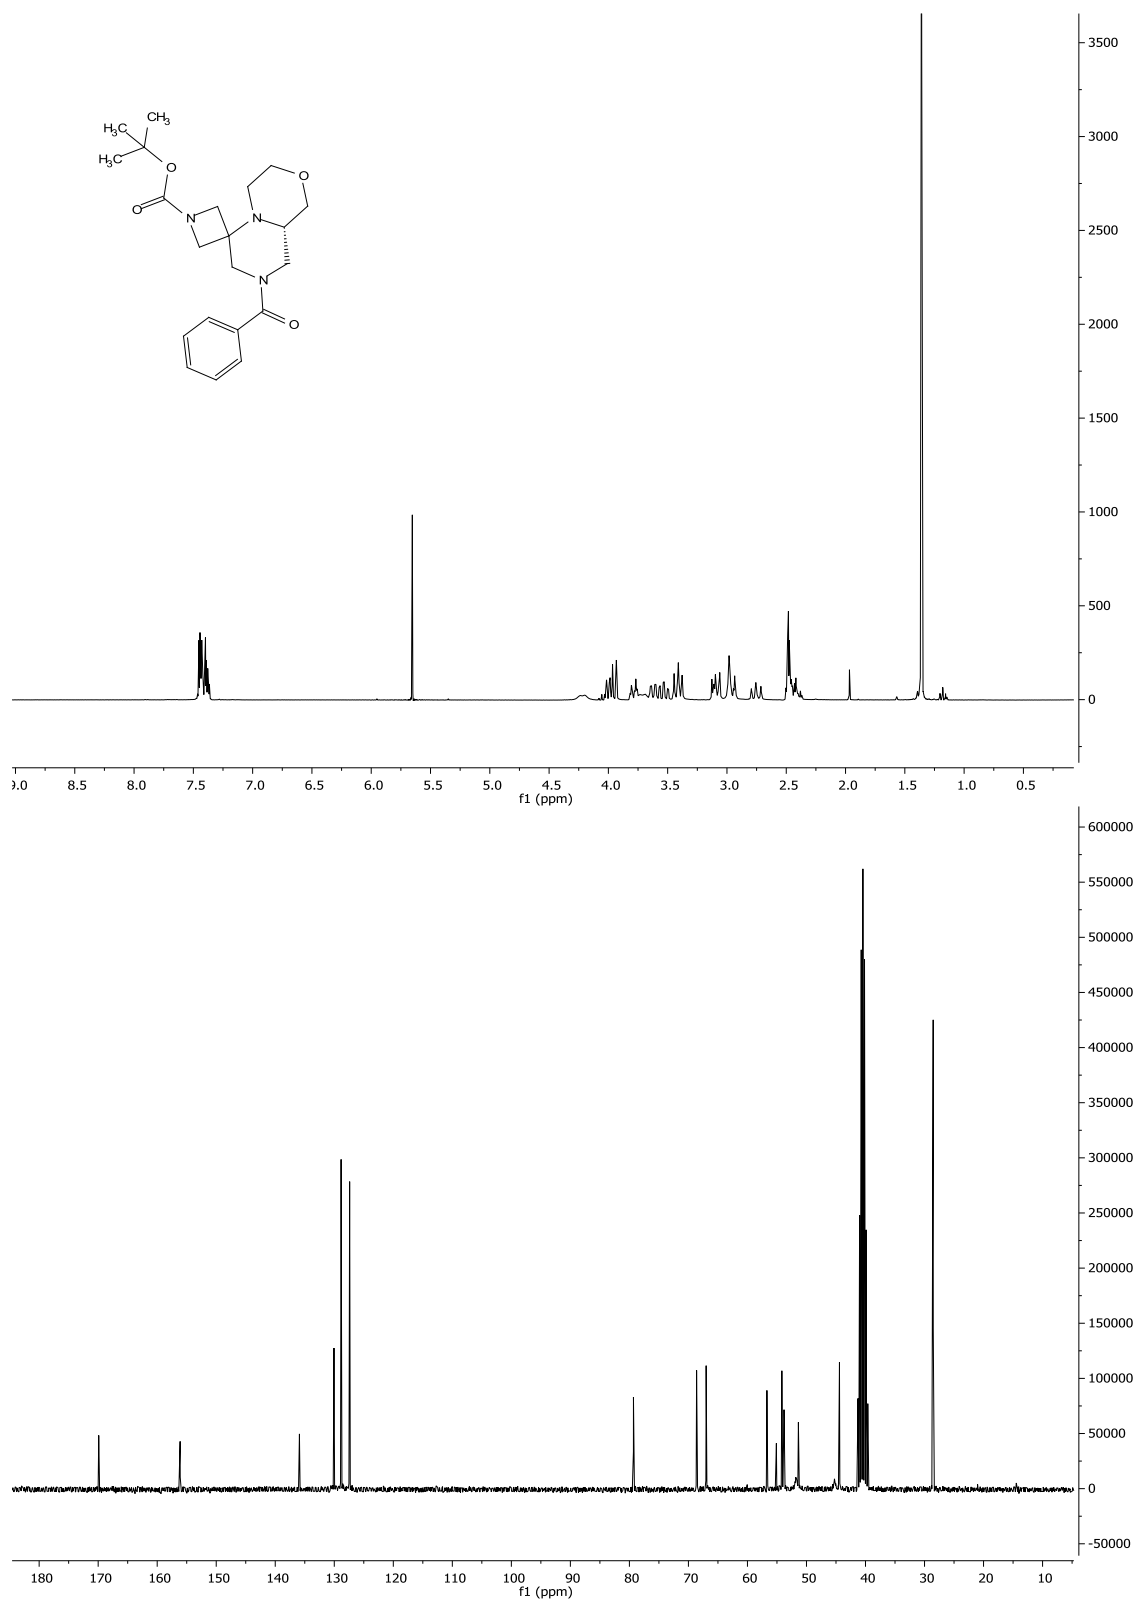

# Compound 14{1}

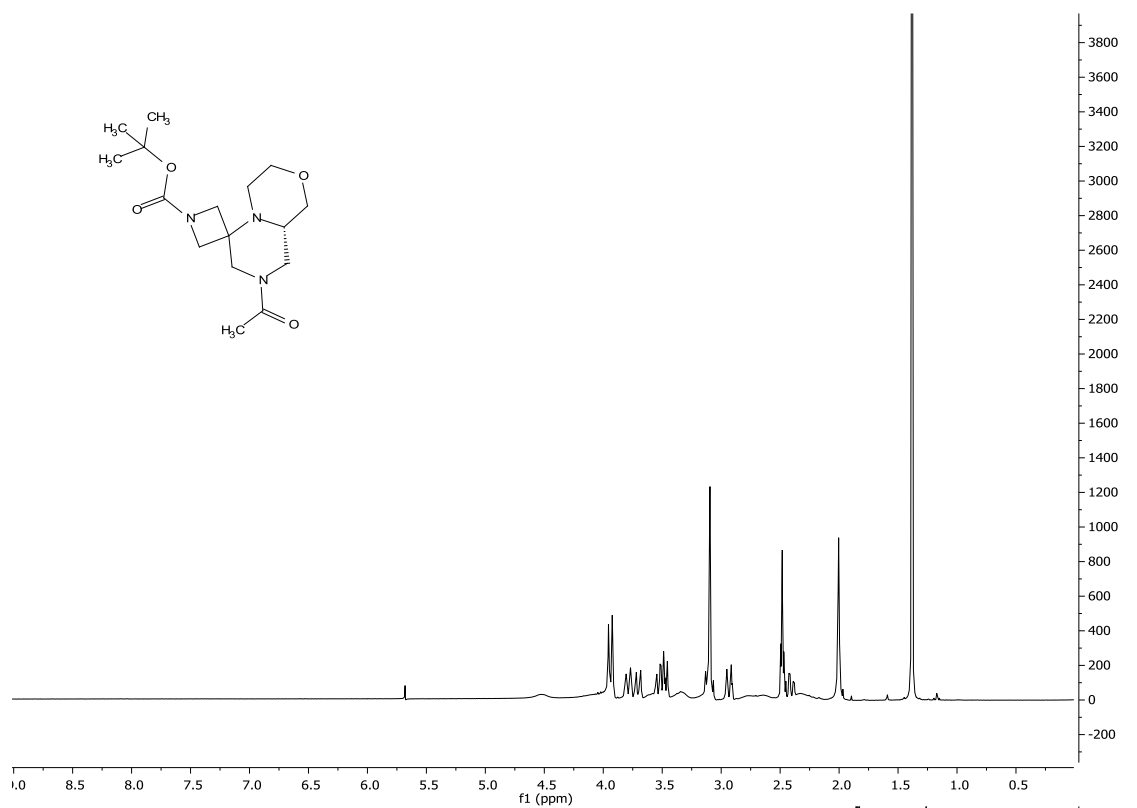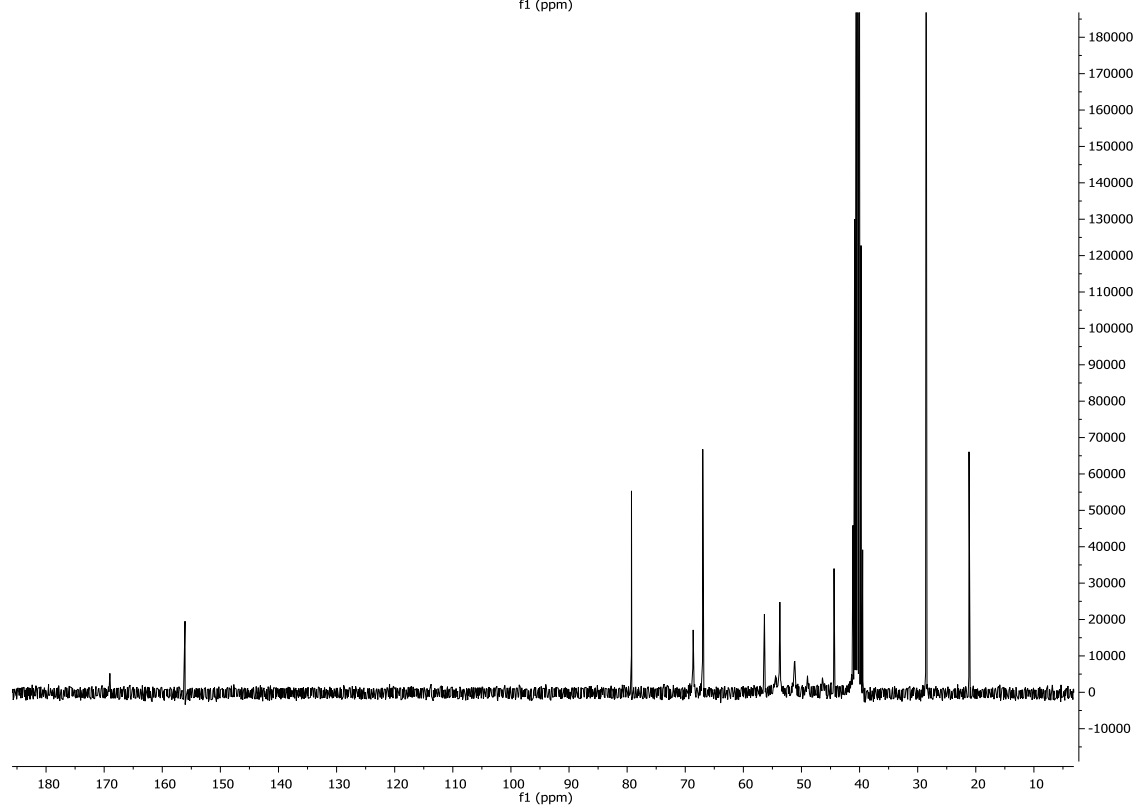

**Compound 14{7}**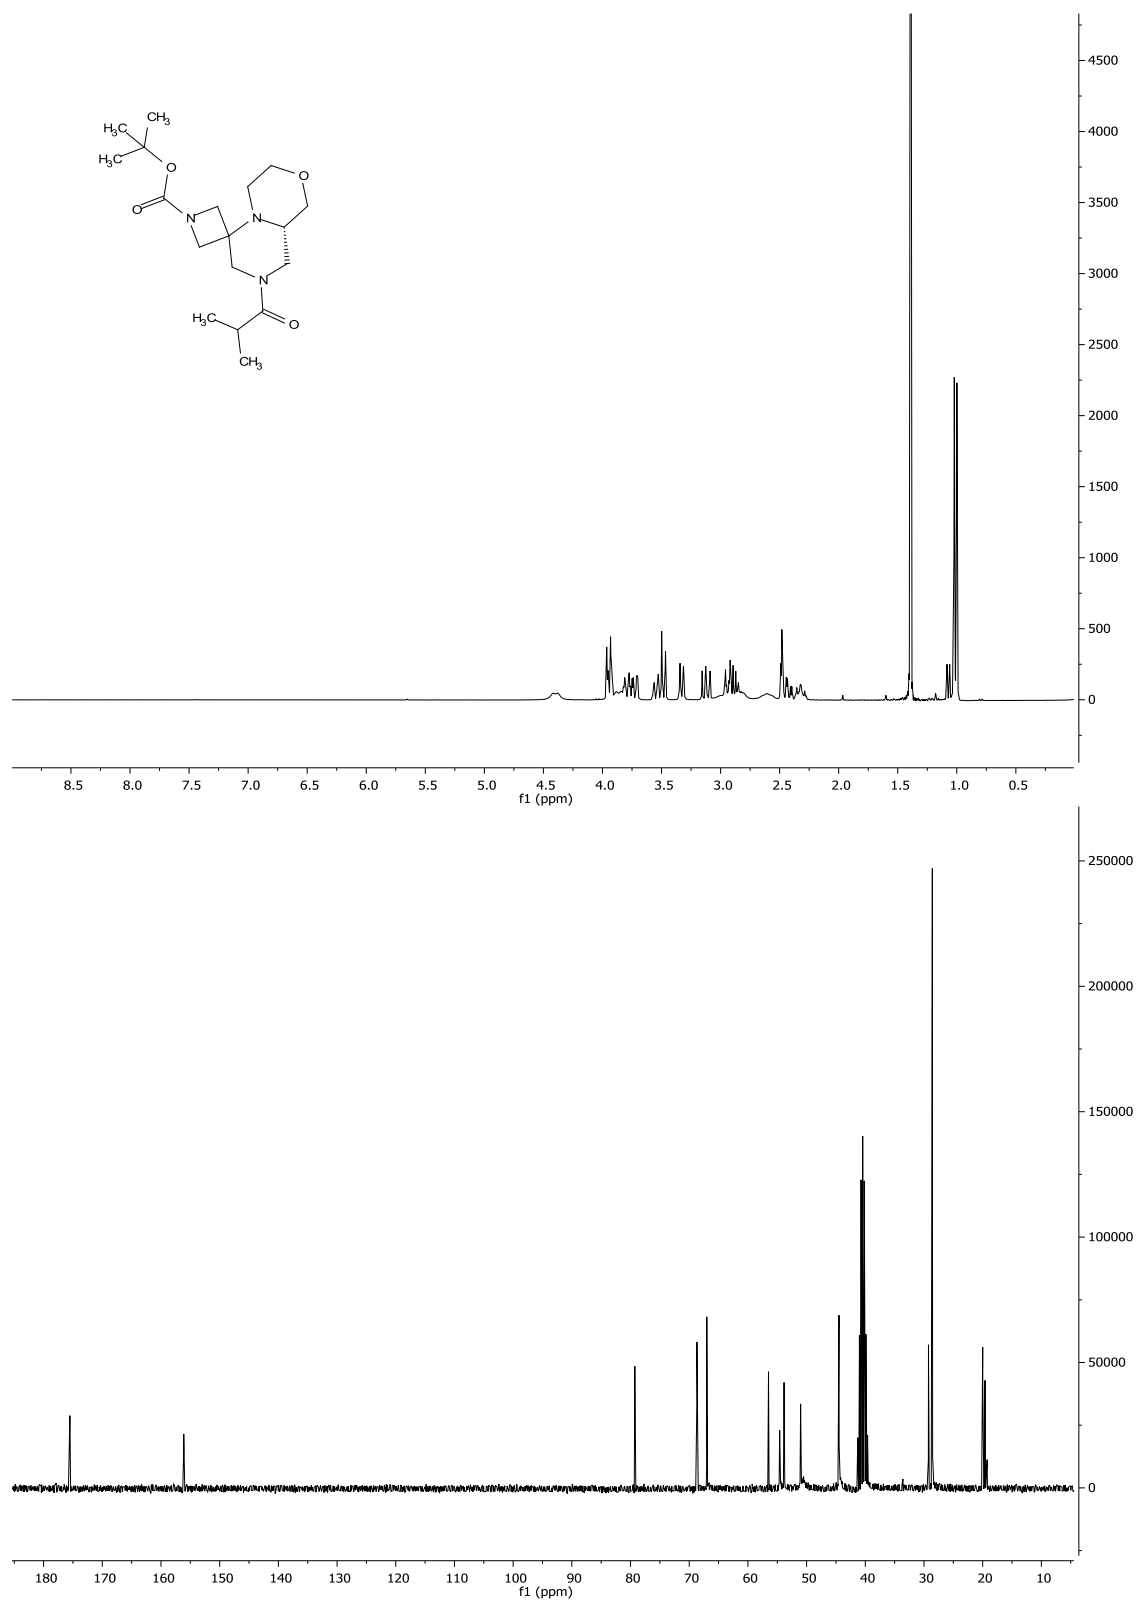

# Compound 14{4}

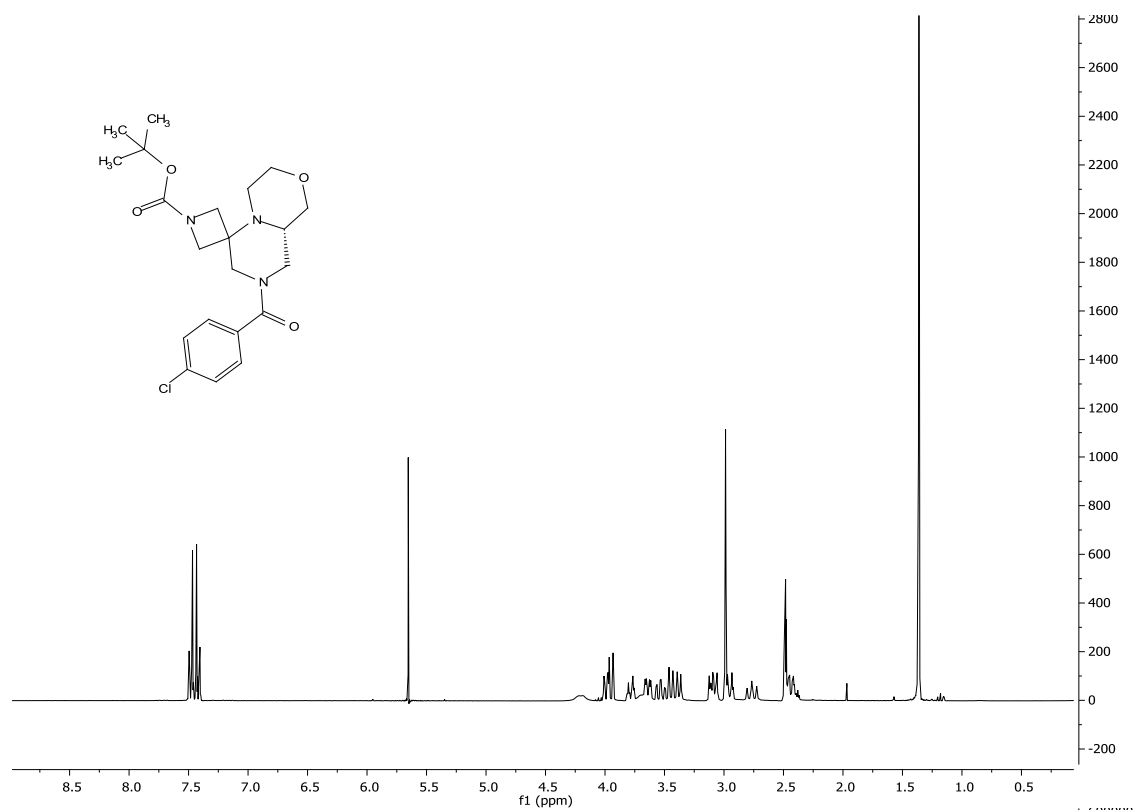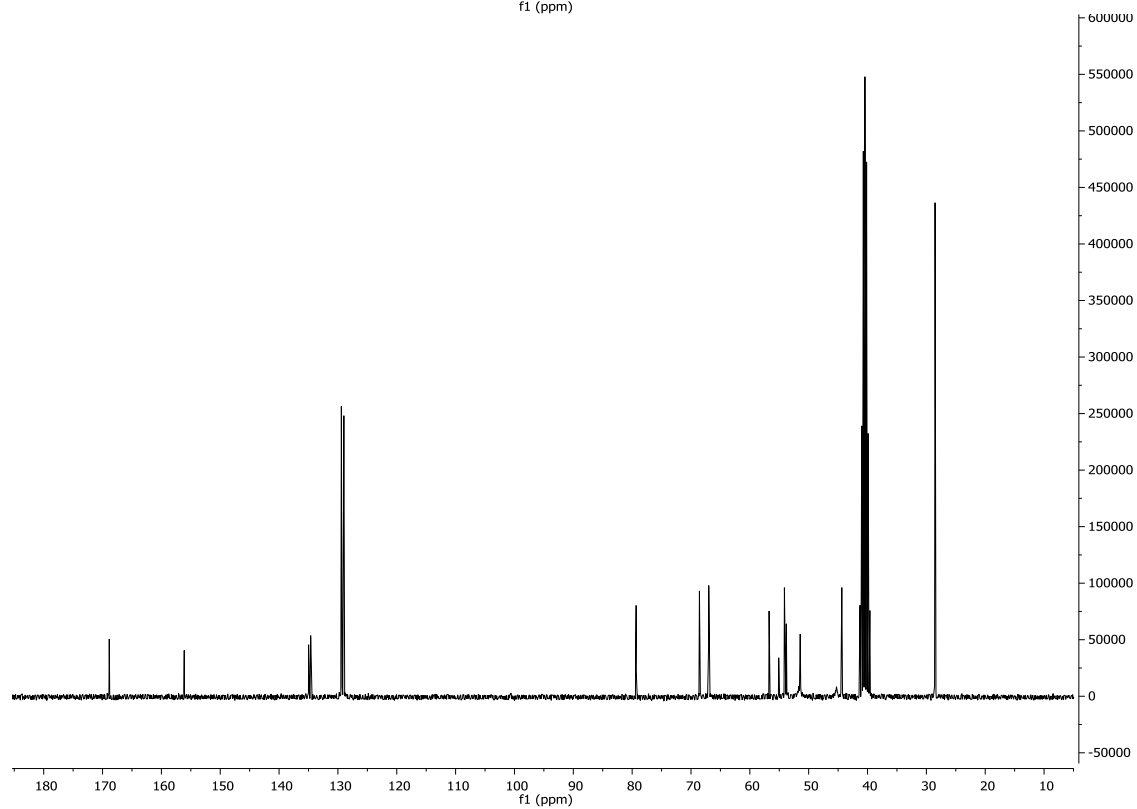

## Compound 14{9}

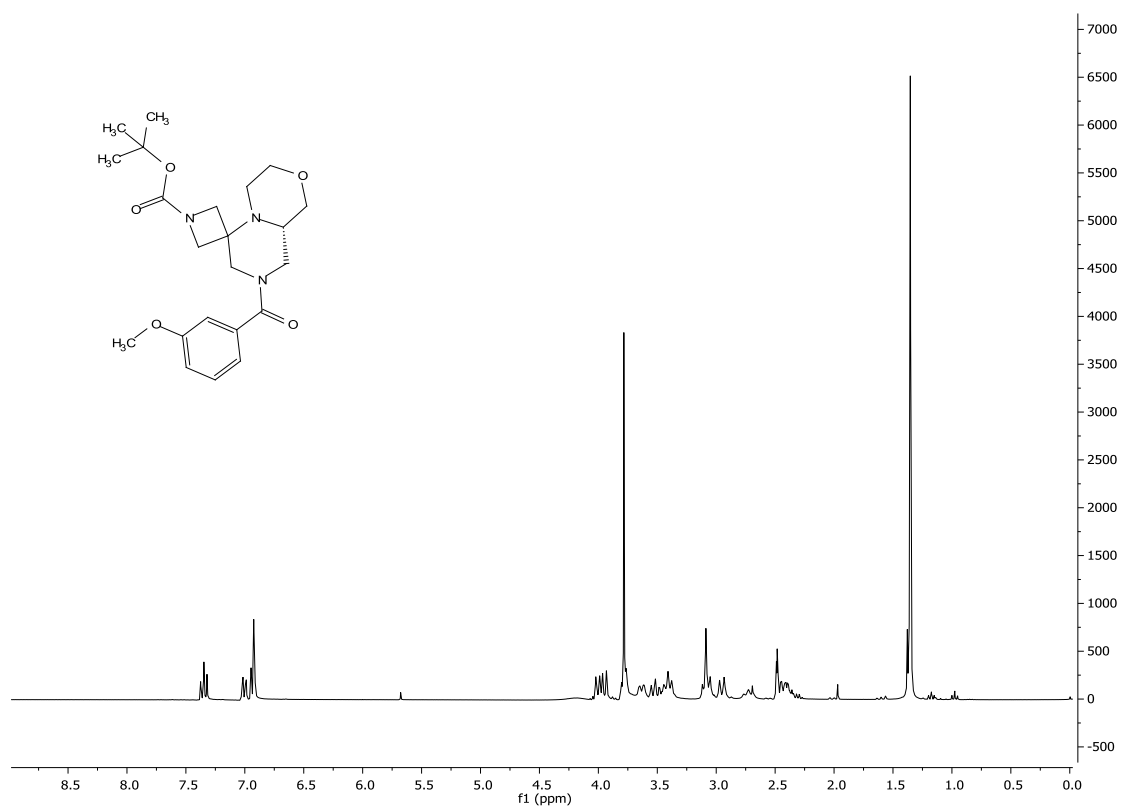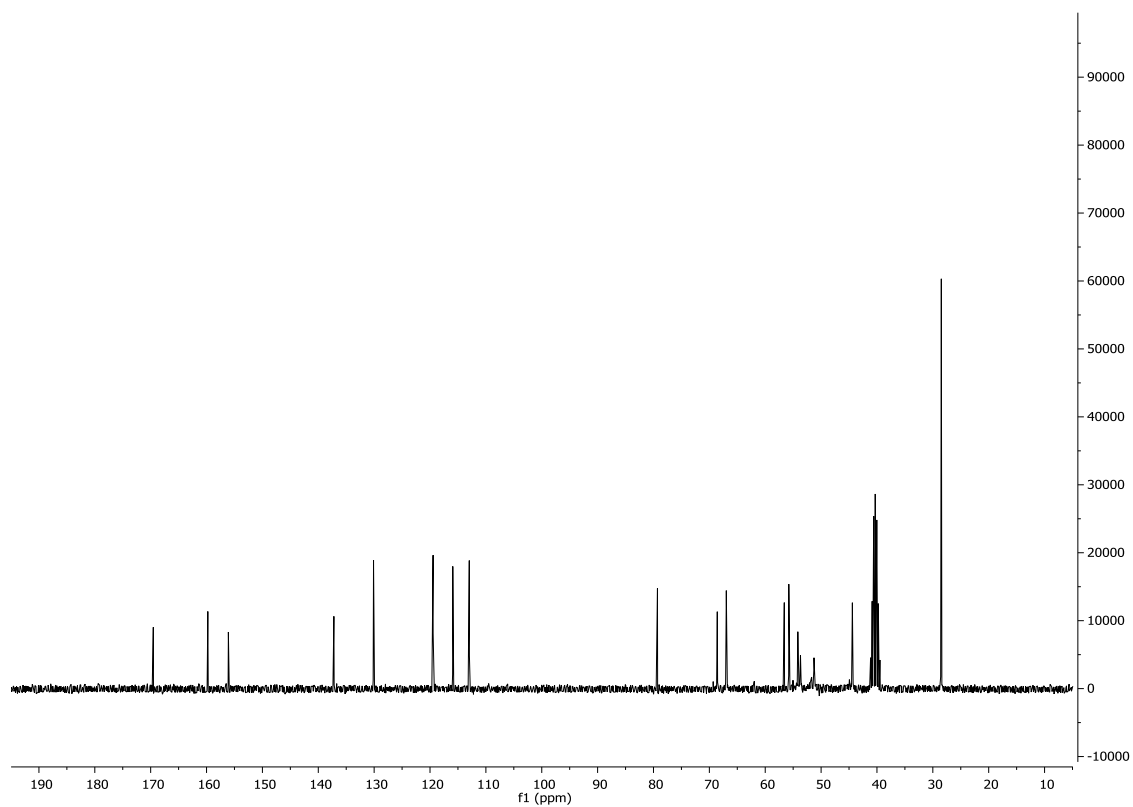



# Compound 14{11}

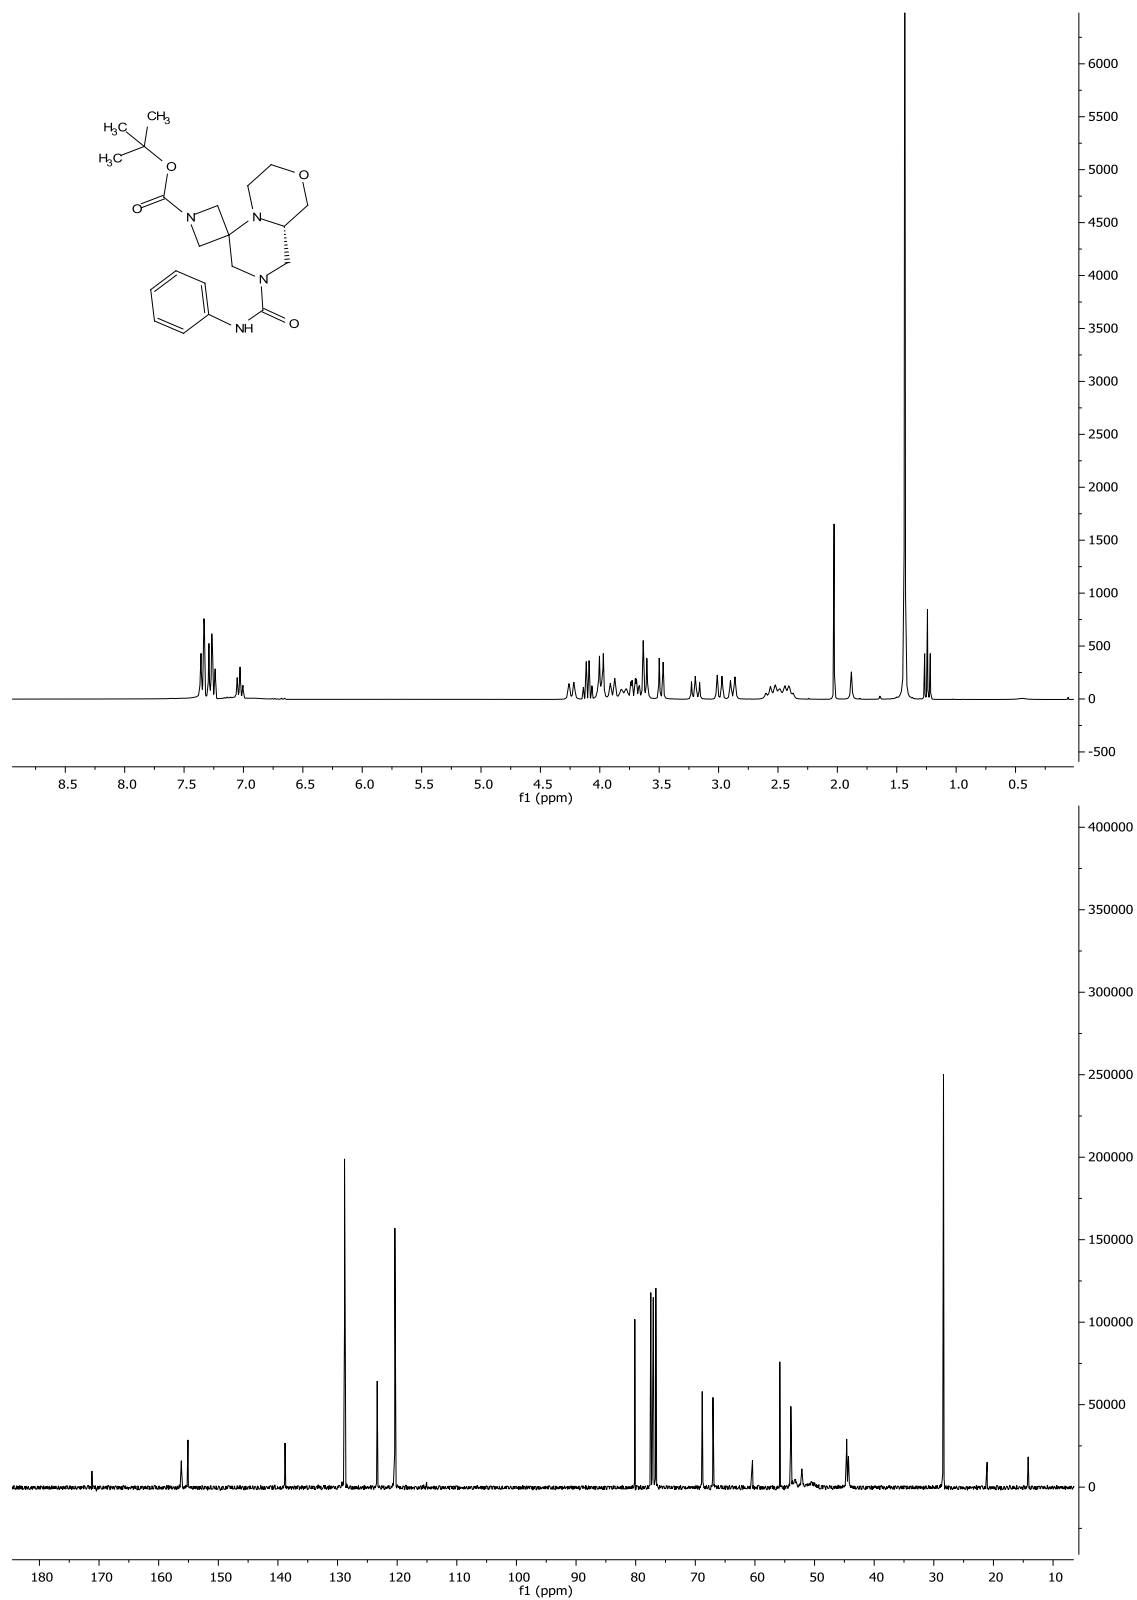

## Compound 14{5}

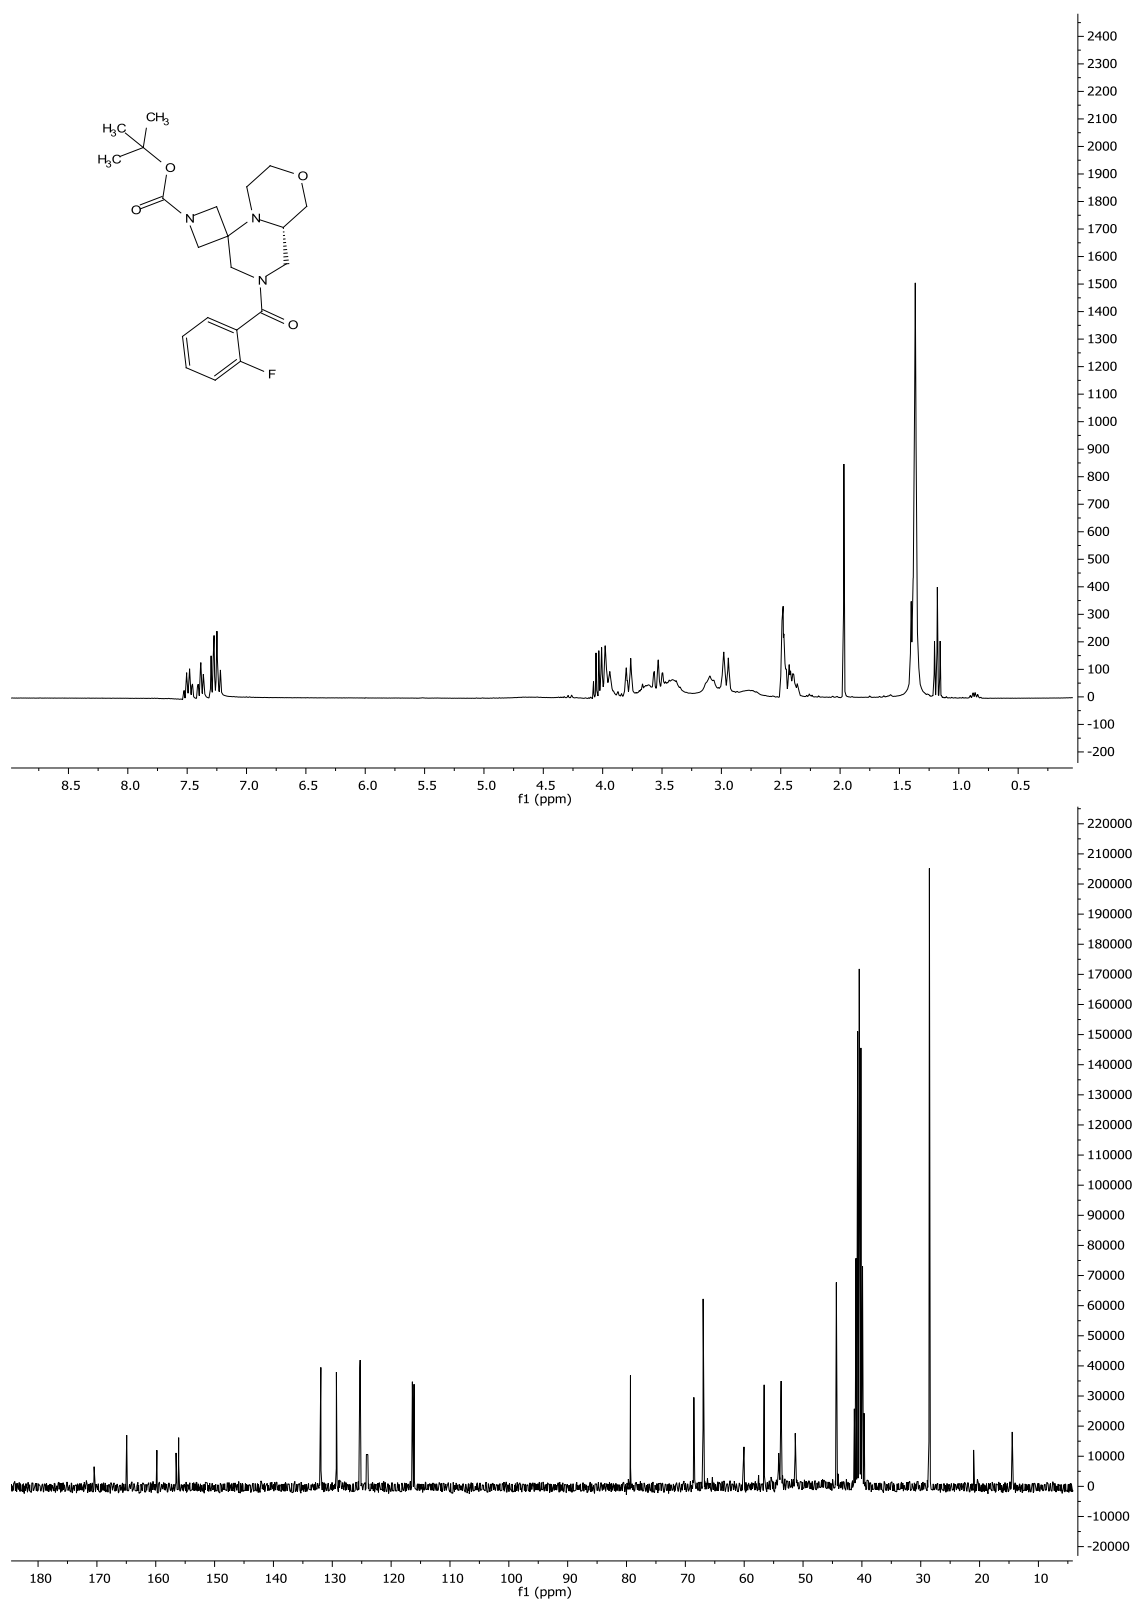

# Compound 14{10}

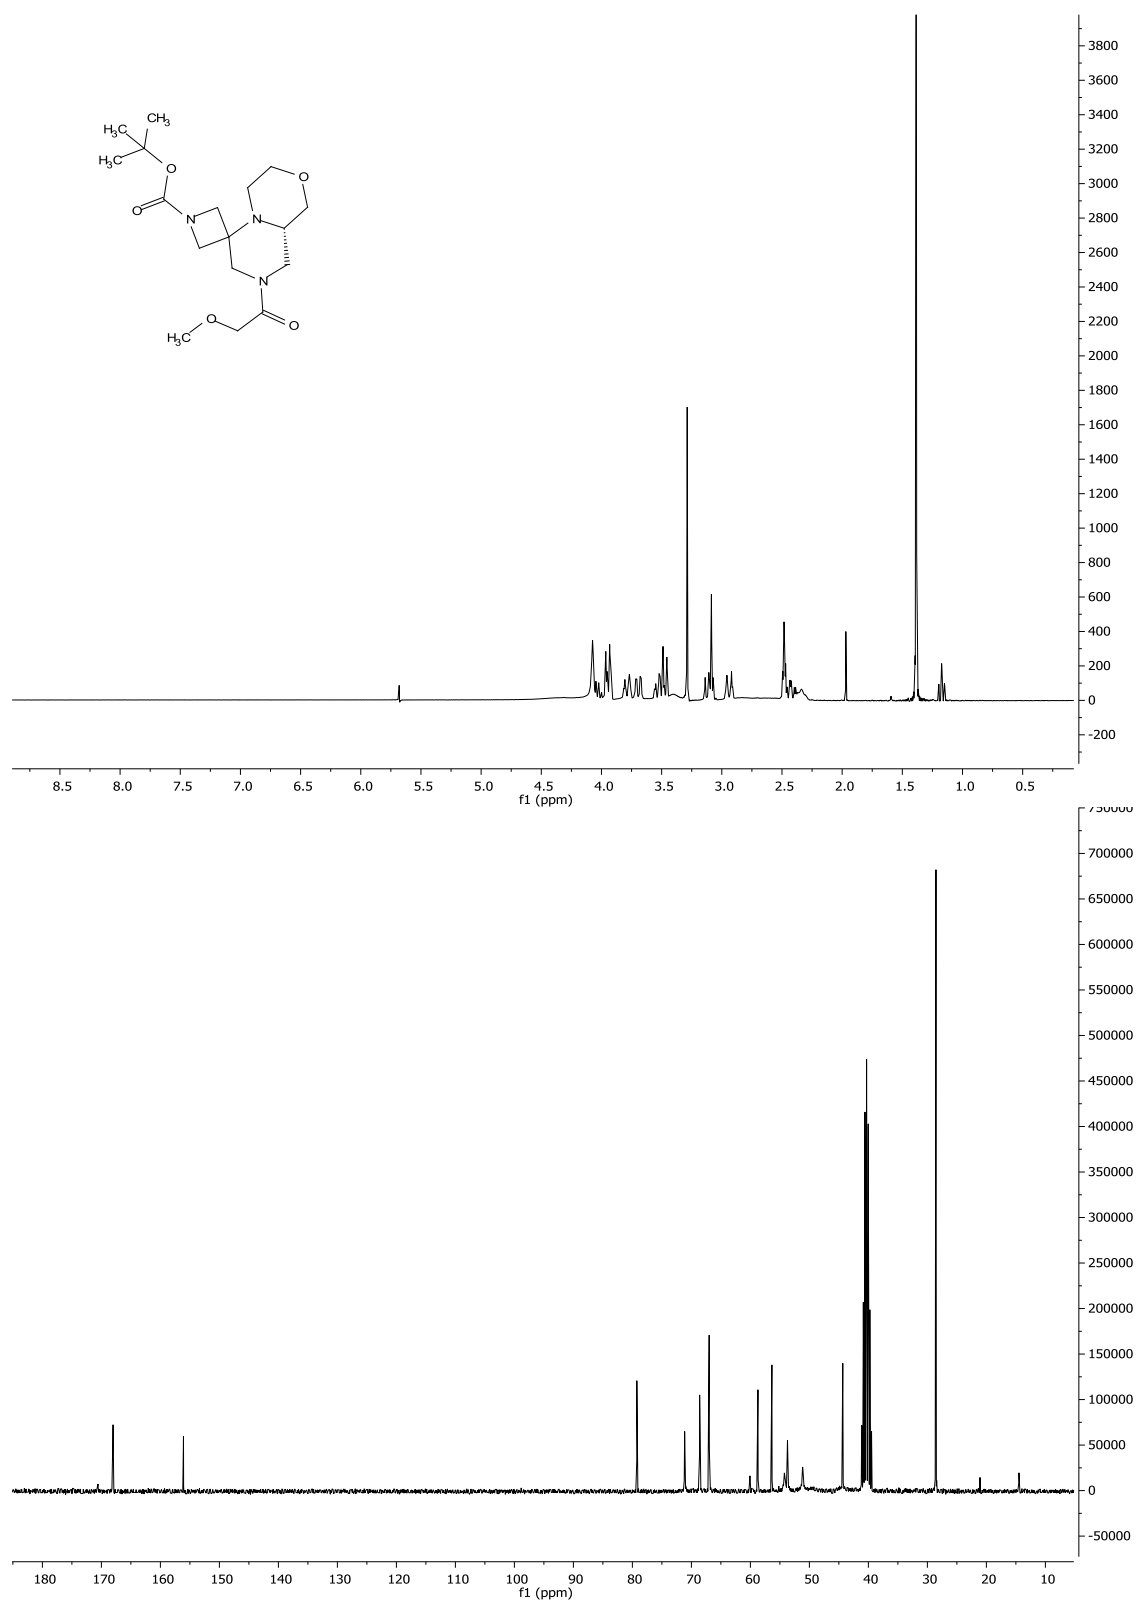

## Compound 14{8}

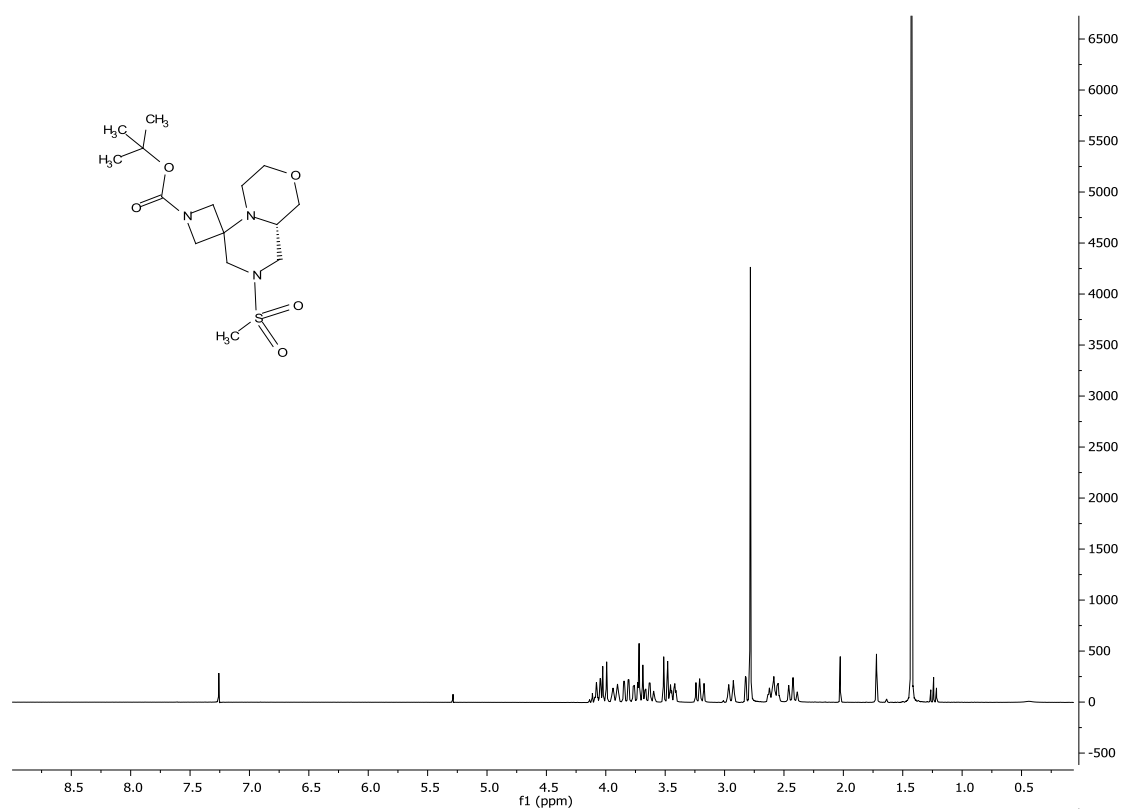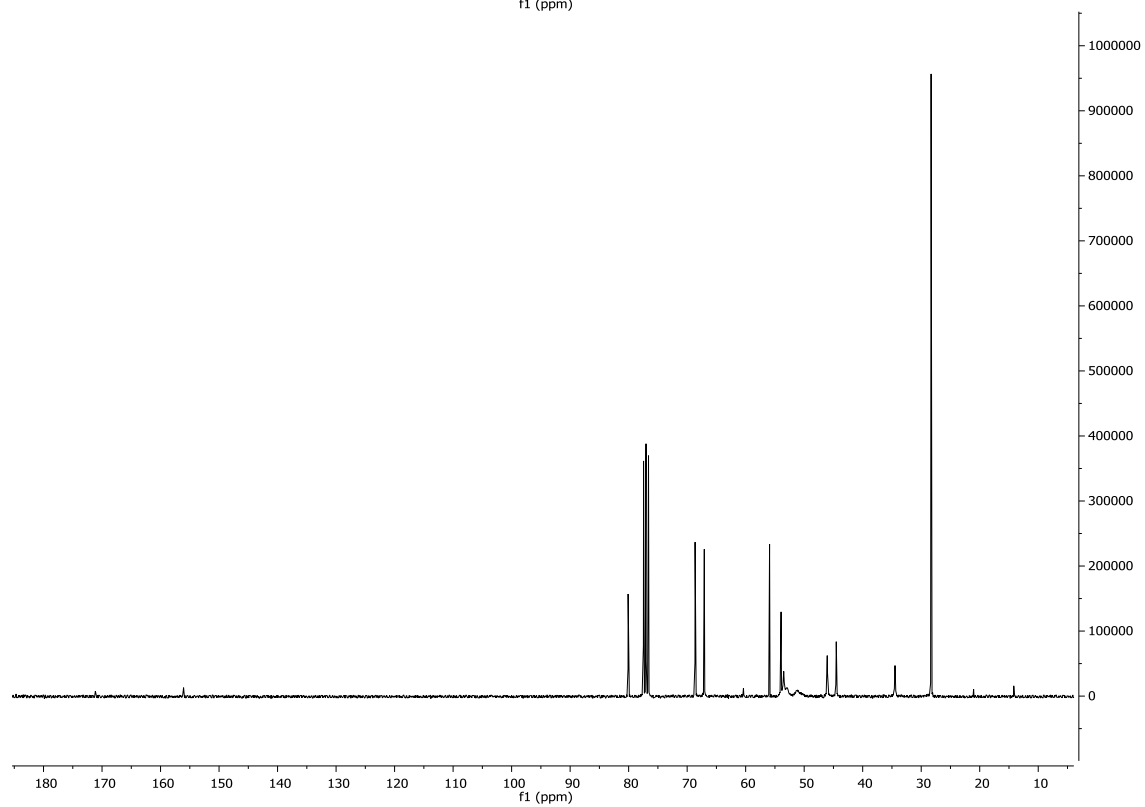

# Compound 14{6}

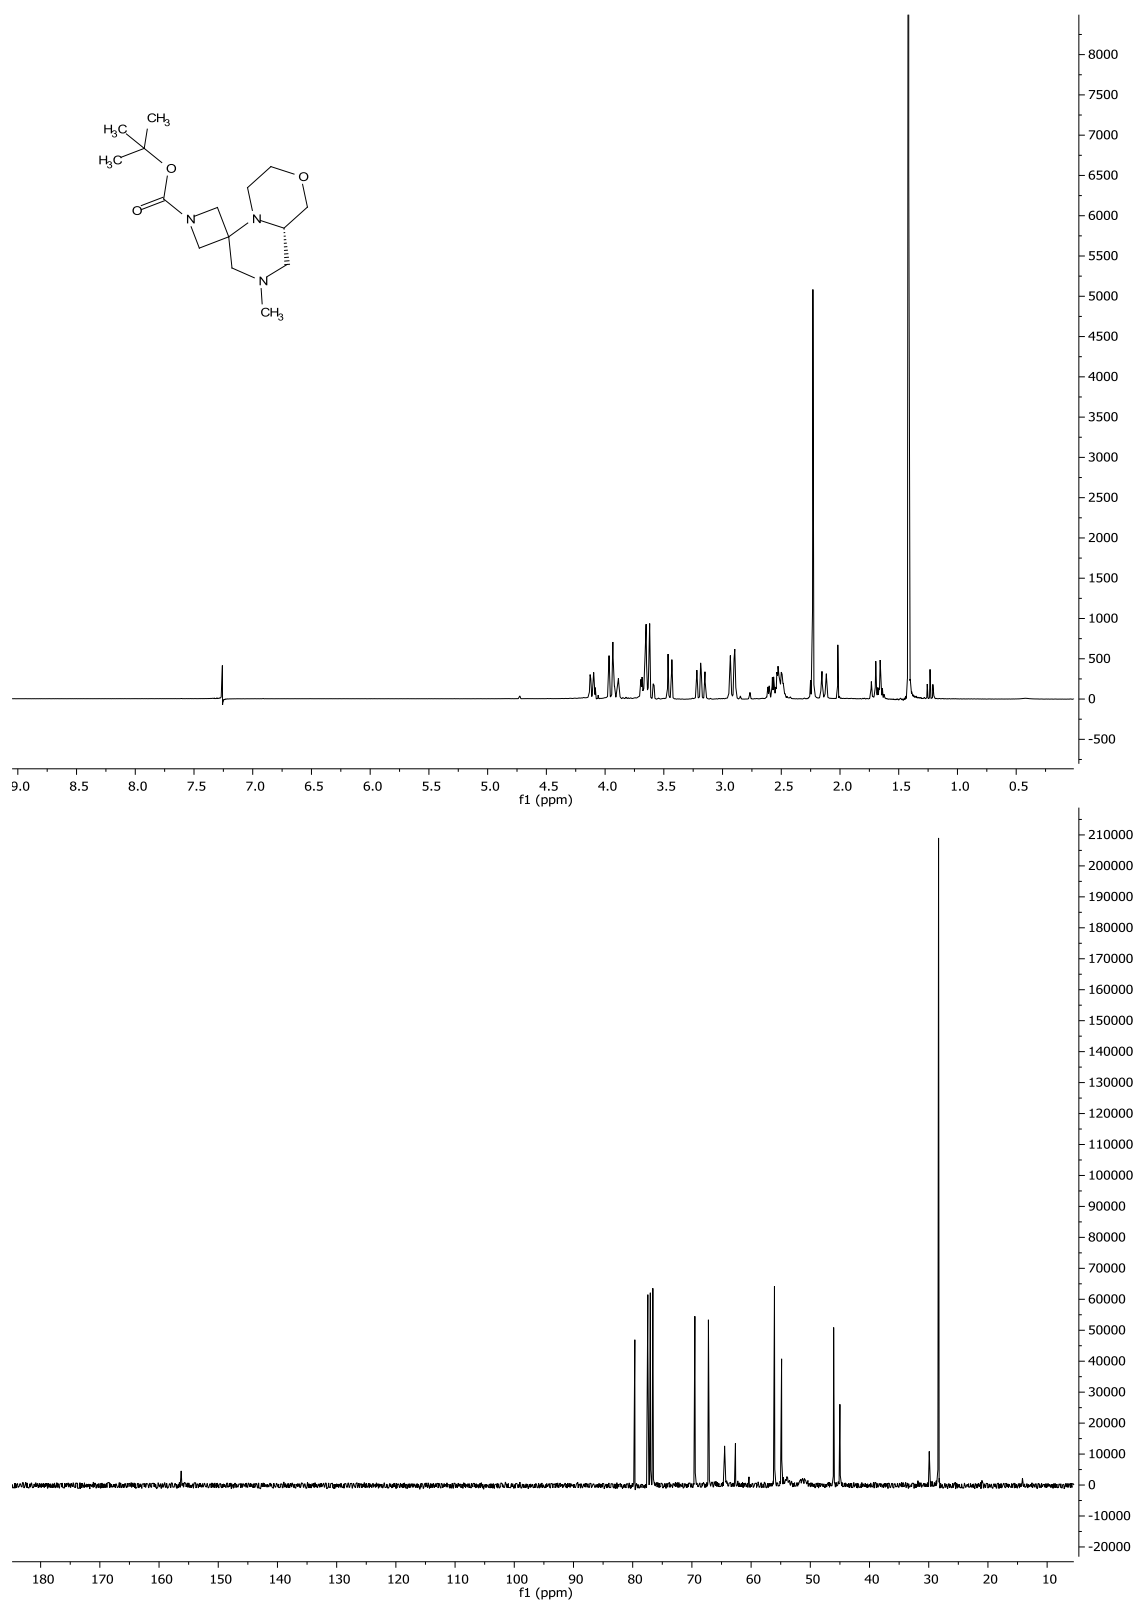

## Compound 14{2}

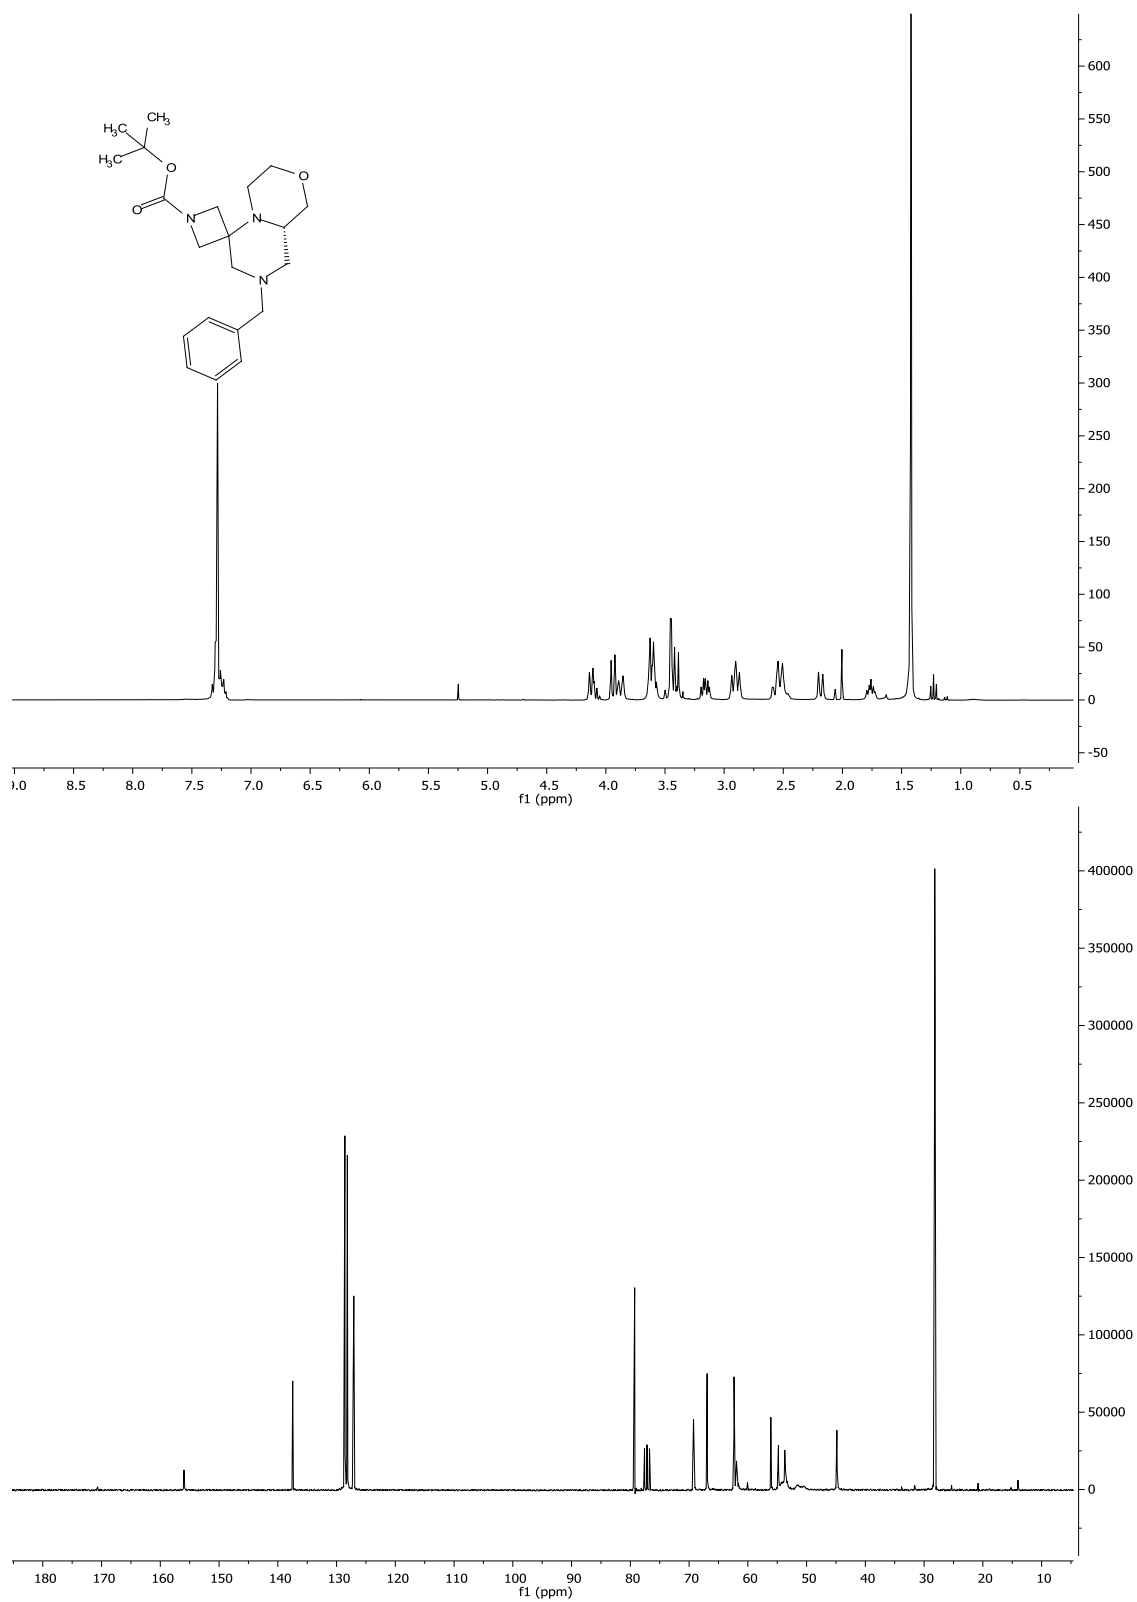

Supplement: Supplementary file [file 12973103]
